# Supplementary material for: Impact of Treatment with RUTF on Plasma Lipid Profiles of Severely Malnourished Pakistani Children
Source: MDPI journal article supplement (doi:10.3390/nu12072163), 2020-07-21

**Supplementary Figure S1: Polar lipid composition.** Median and interquartile ranges shown for baseline (Before) and after three months of treatment with RUTF (After).  
**Legend:**  $p$ -values after FDR adjustment are expressed as \*\*\* $p<0.001$ , \*\*  $p<0.01$ , \*  $p<0.05$ , ns non-significant

Carn

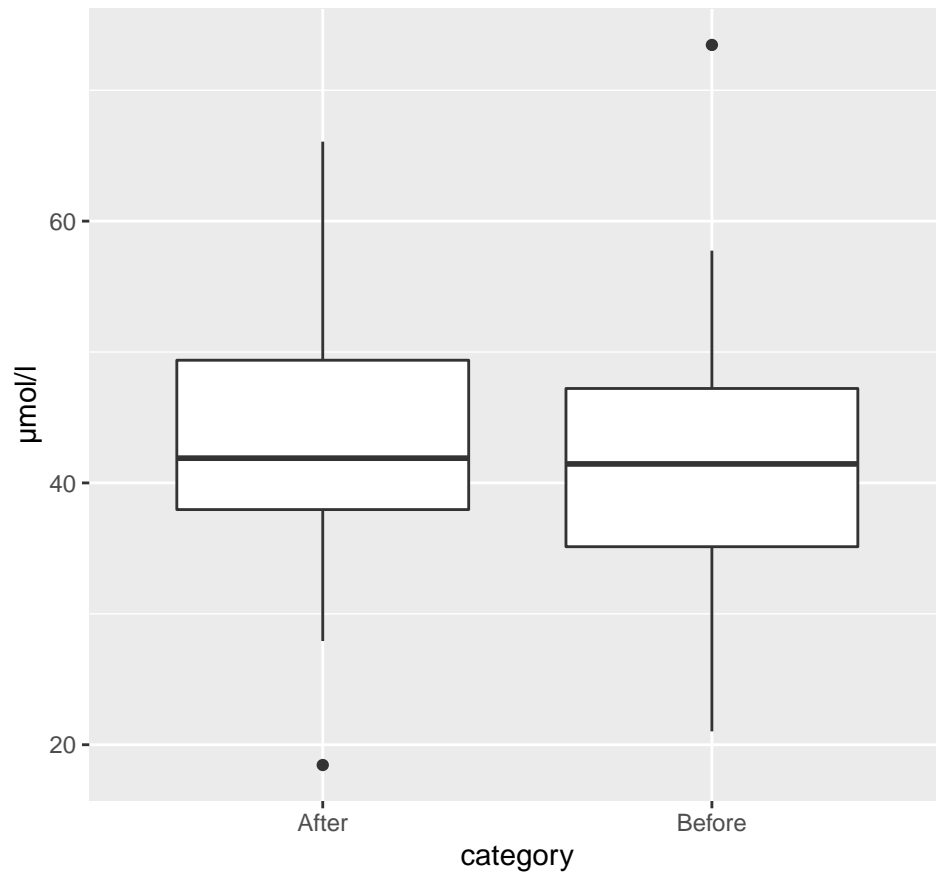

Carn.a.C2.0

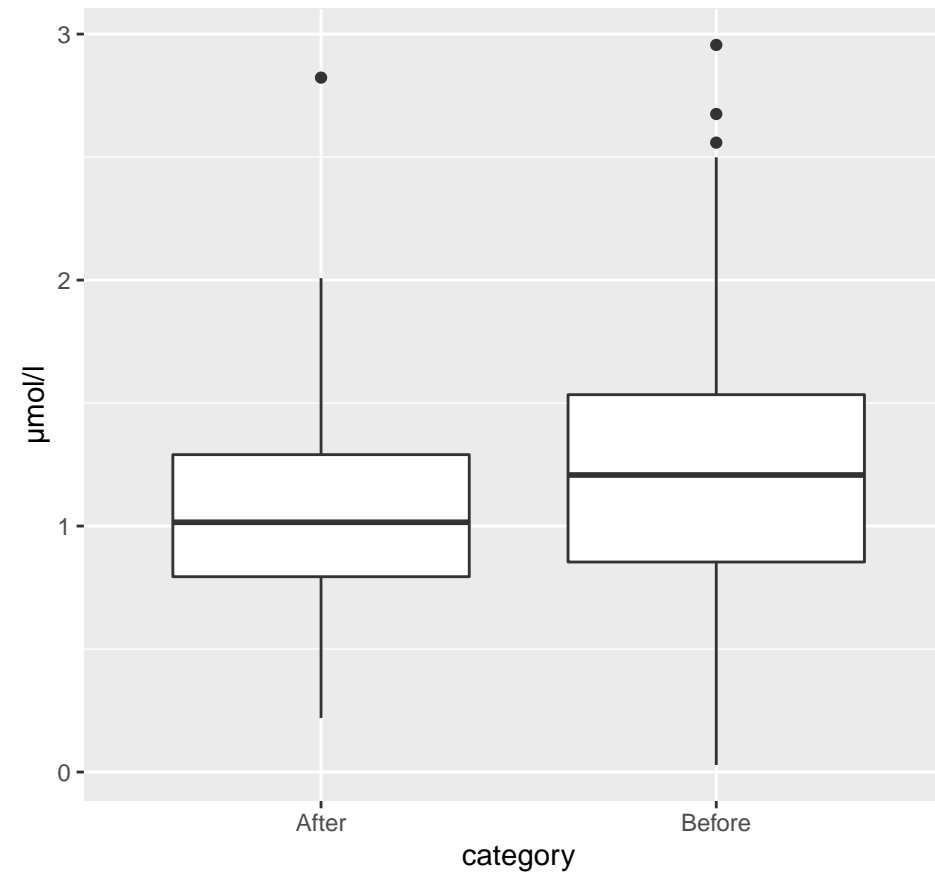

Carn.a.C3.0

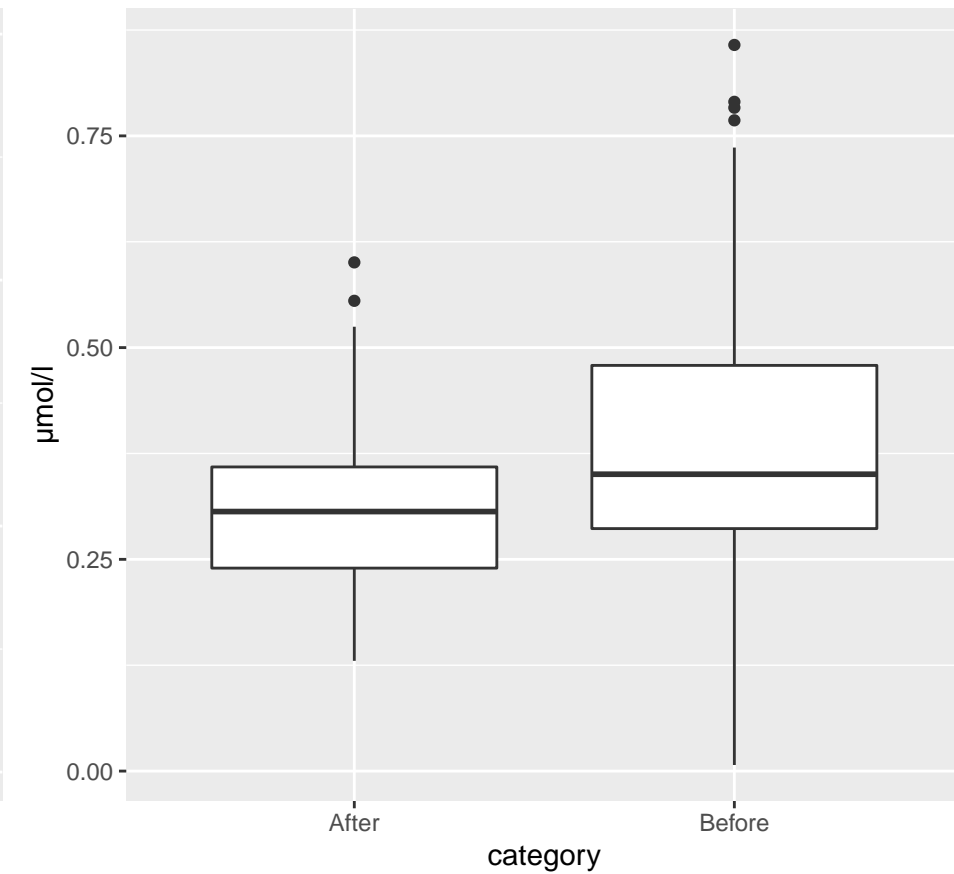

Carn.a.C8.0

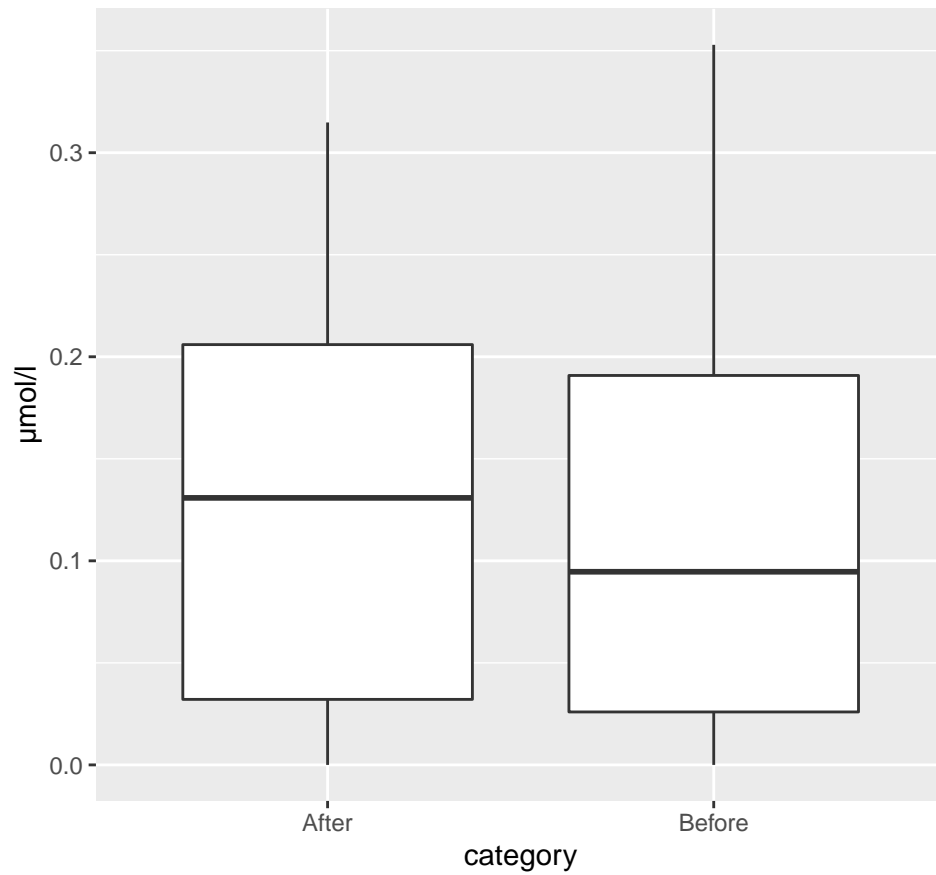

Carn.a.C8.1

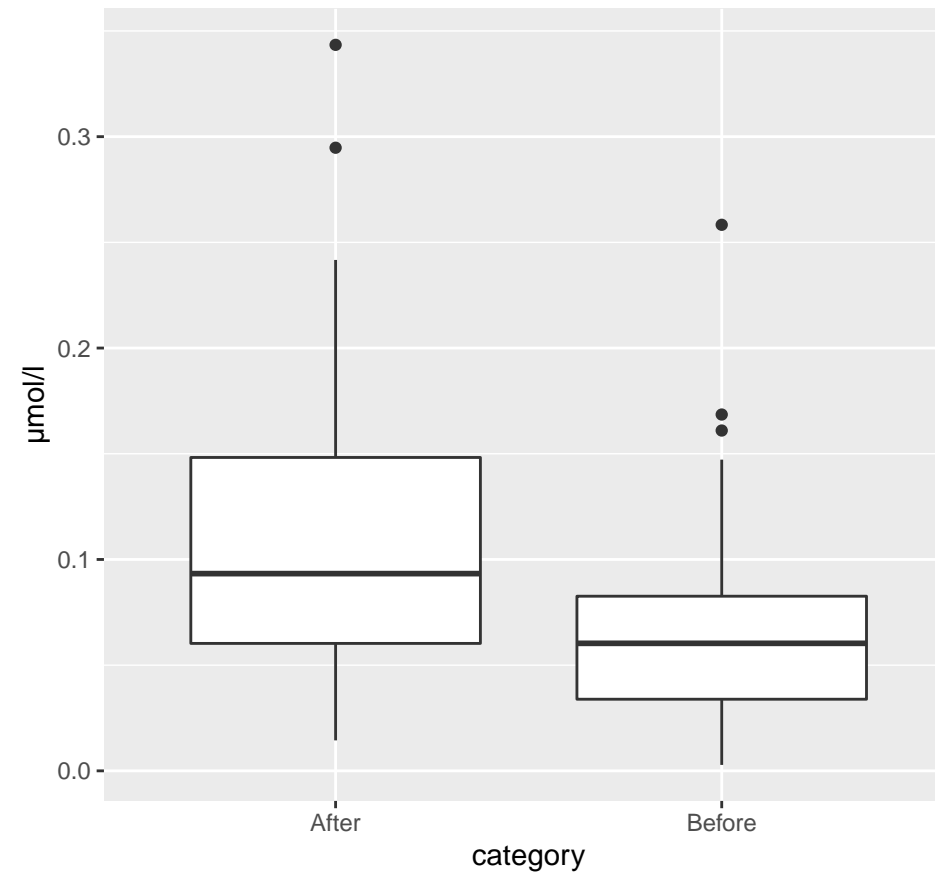

Carn.a.C9.0

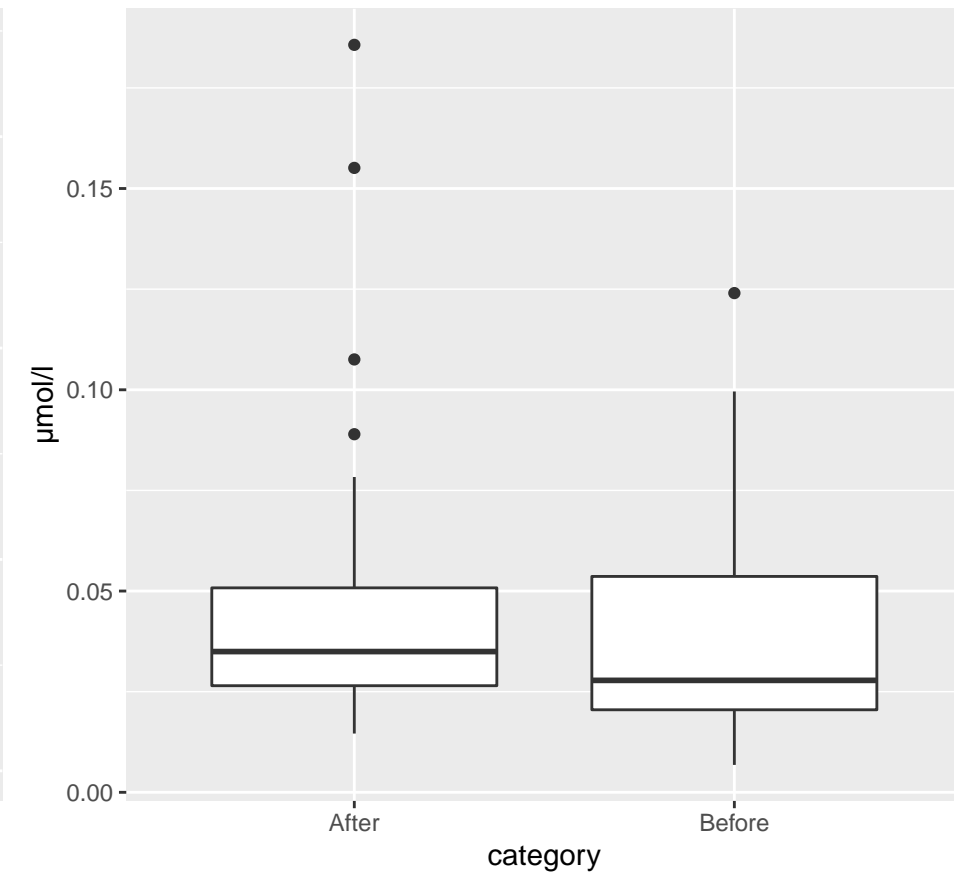

Carn.a.C10.0

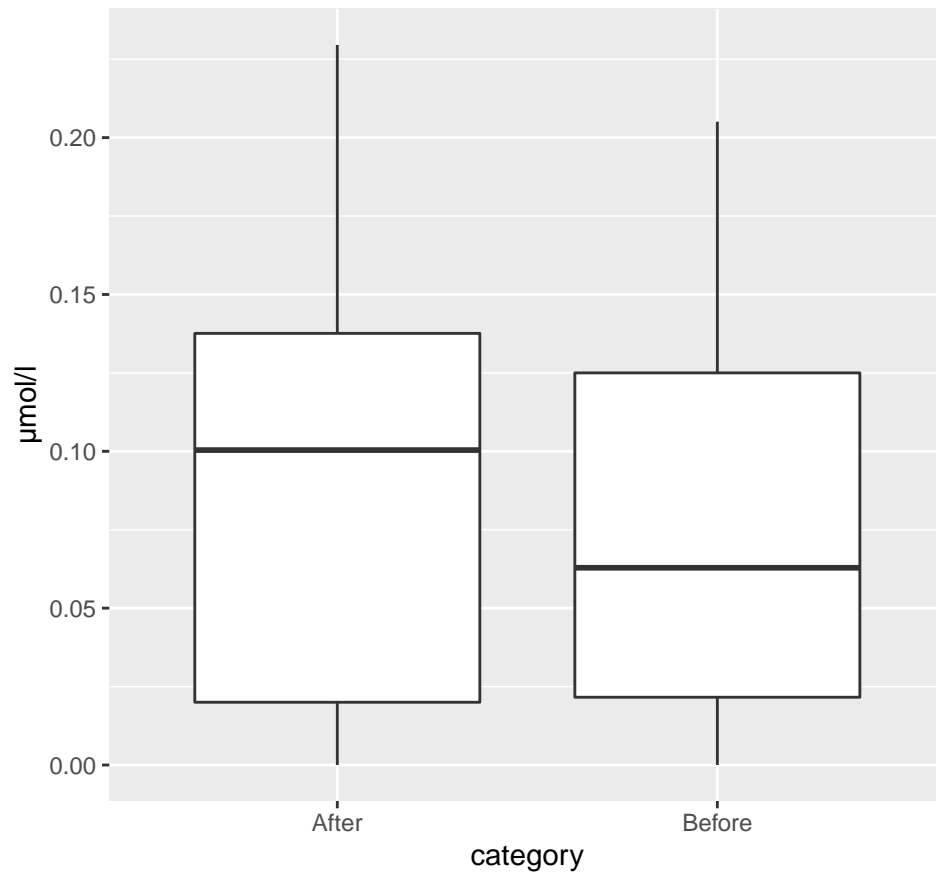

Carn.a.C10.1

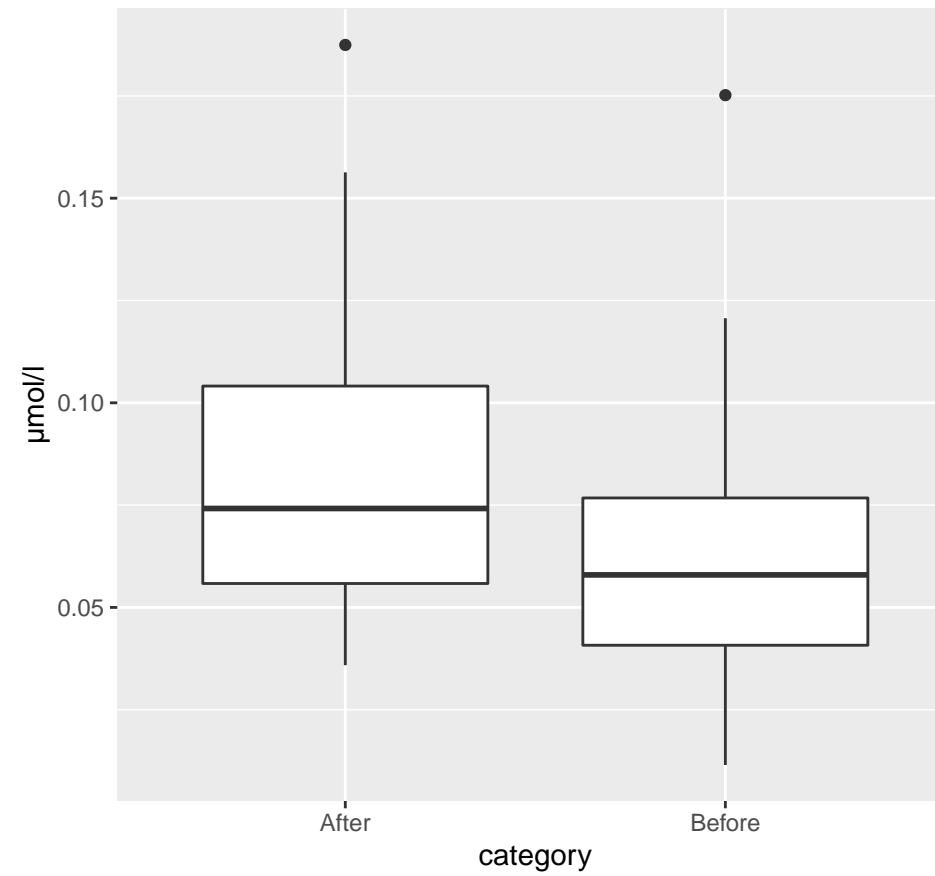

Carn.a.C12.0

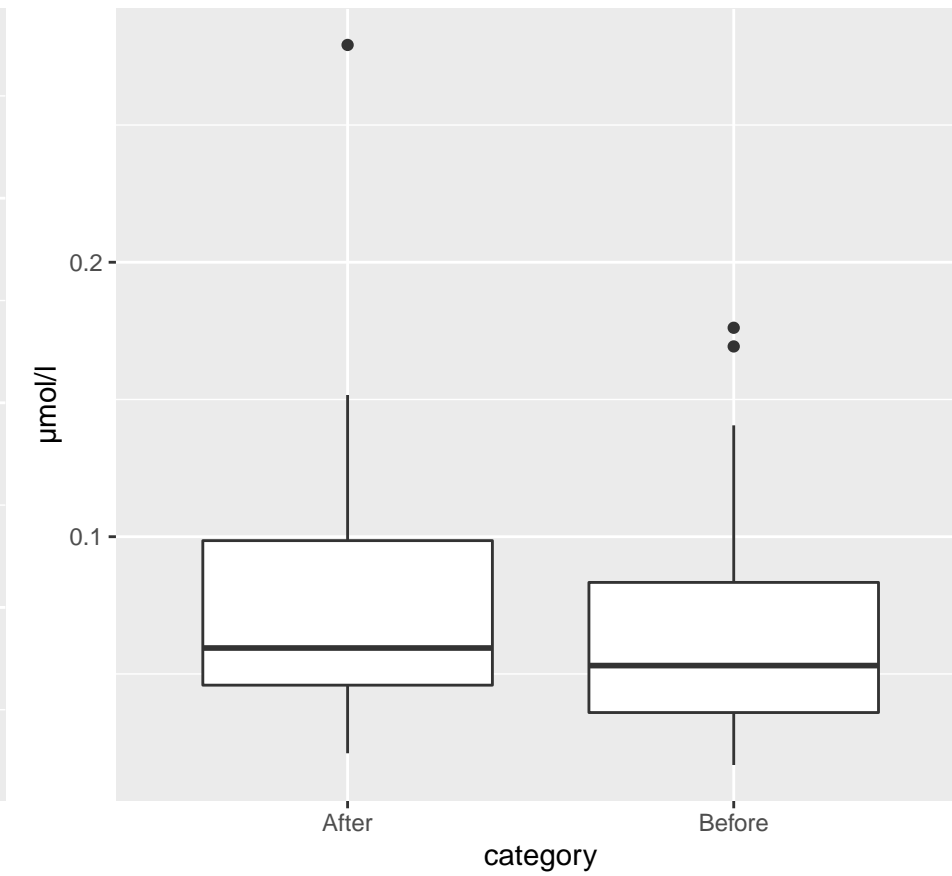

Carn.a.C12.1

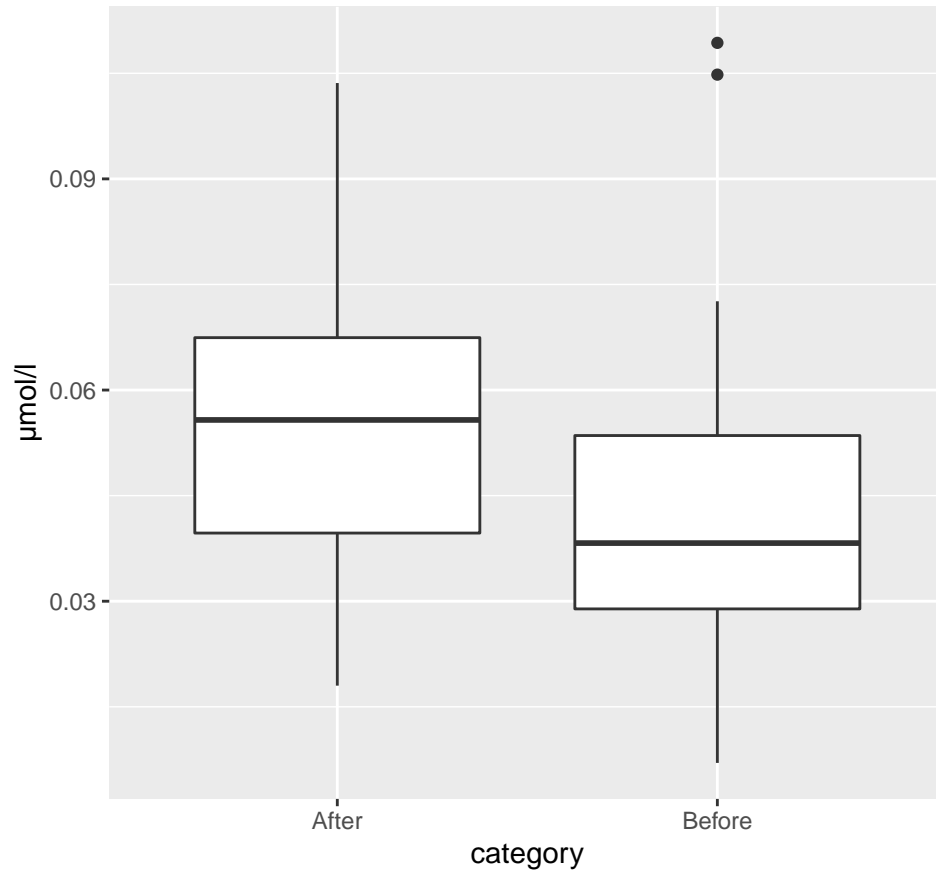

Carn.a.C14.0

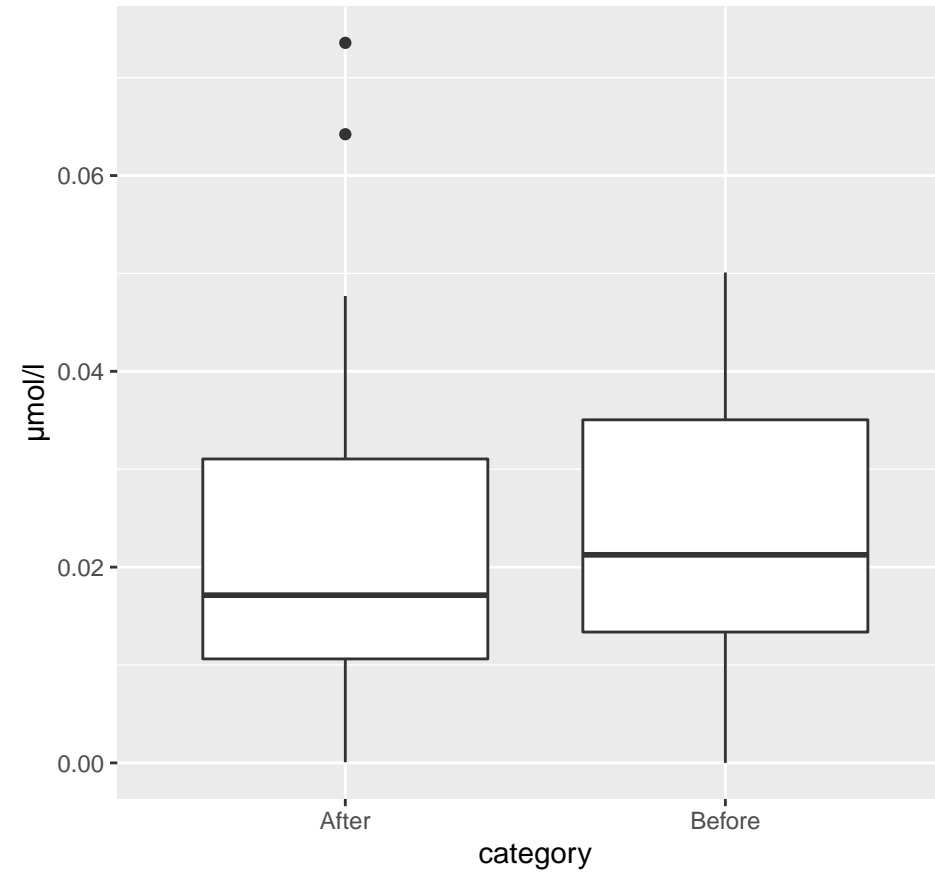

Carn.a.C14.1

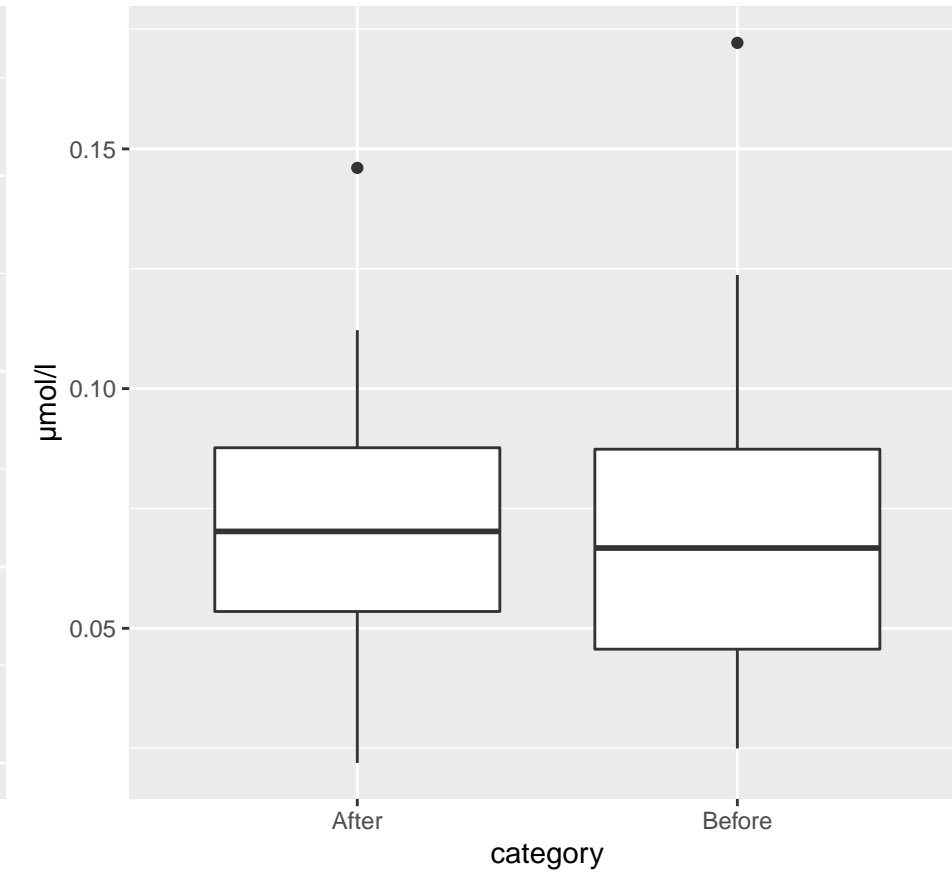

Carn.a.C14.2

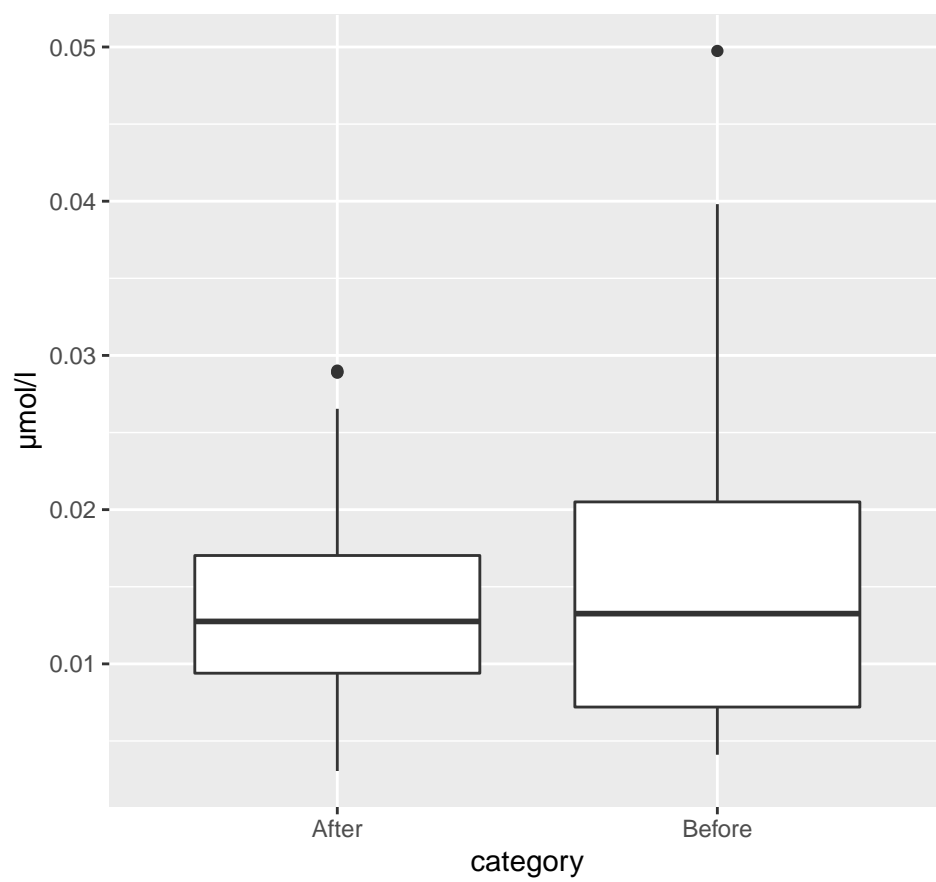

Carn.a.C16.0

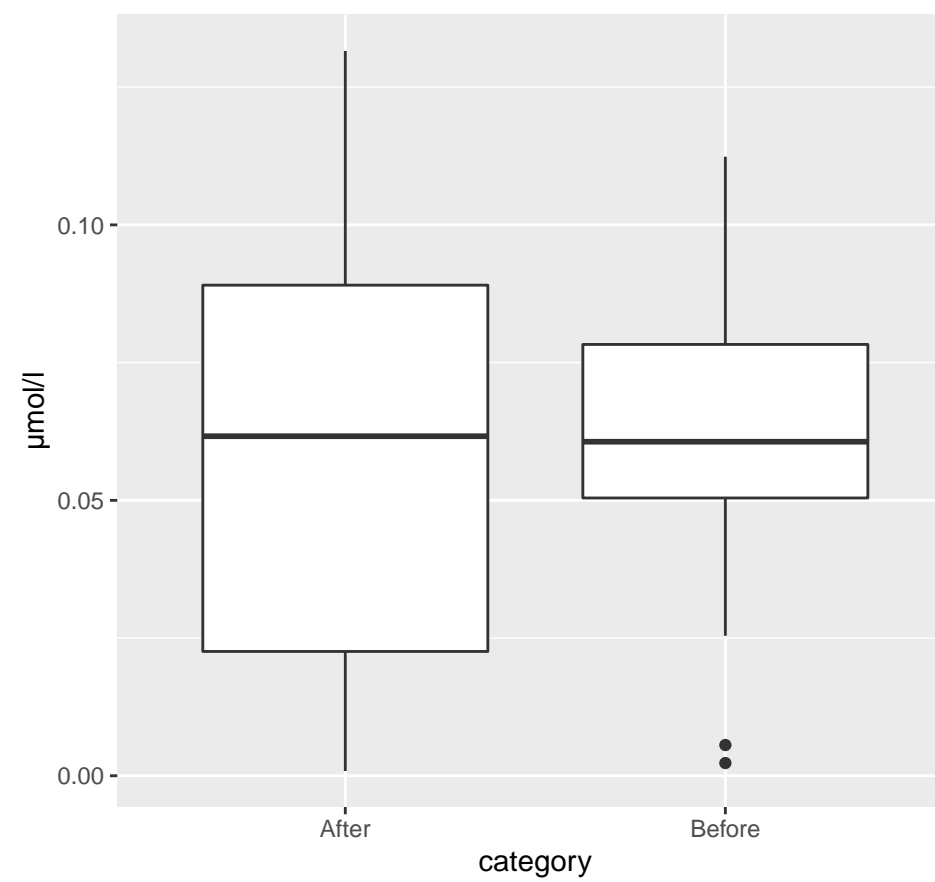

Carn.a.C16.1

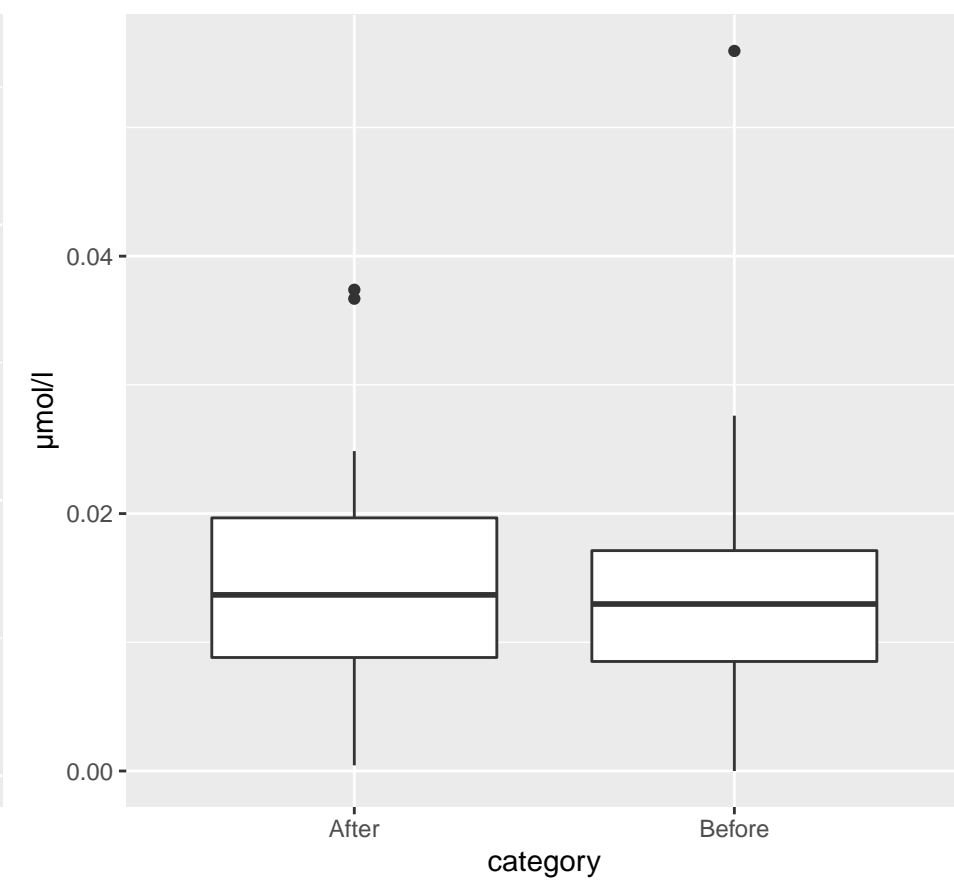

Carn.a.C18.0

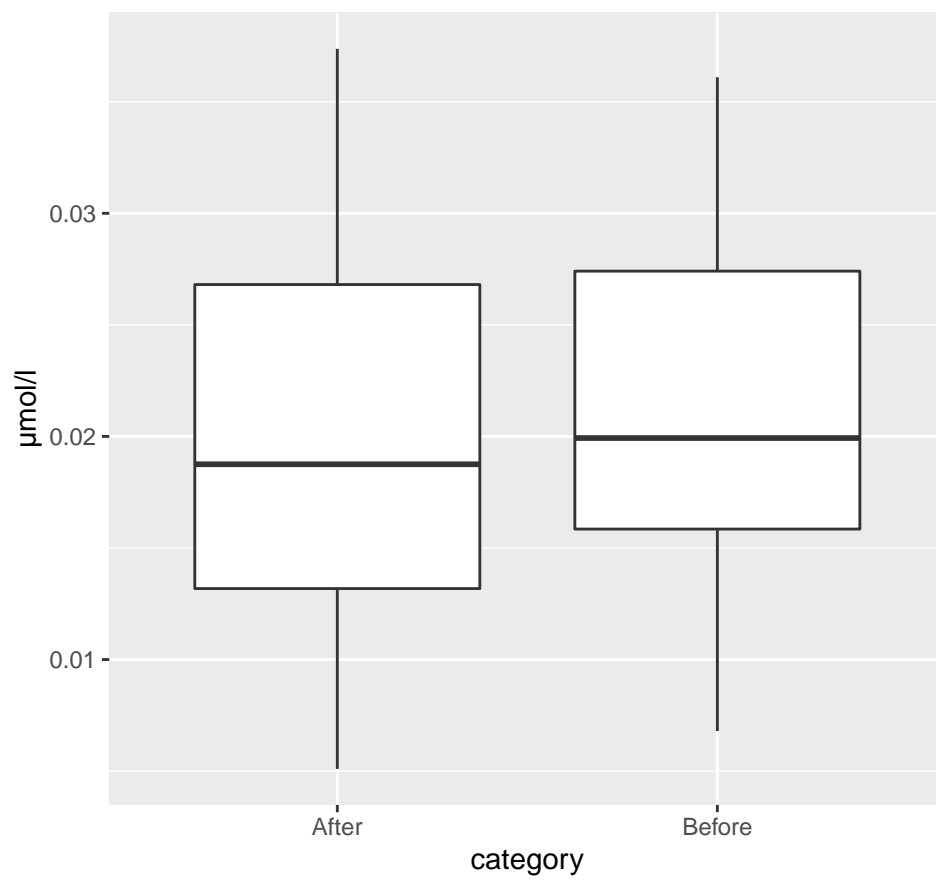

Carn.a.C18.1

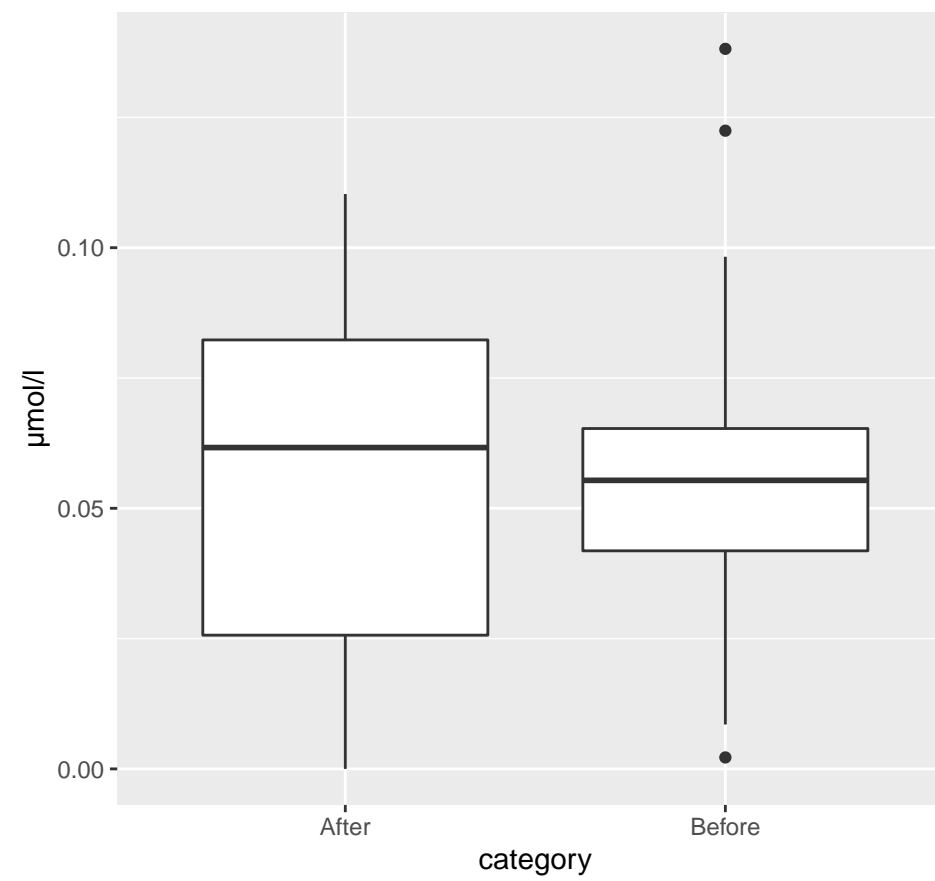

Lyso.PC.a.C14.0

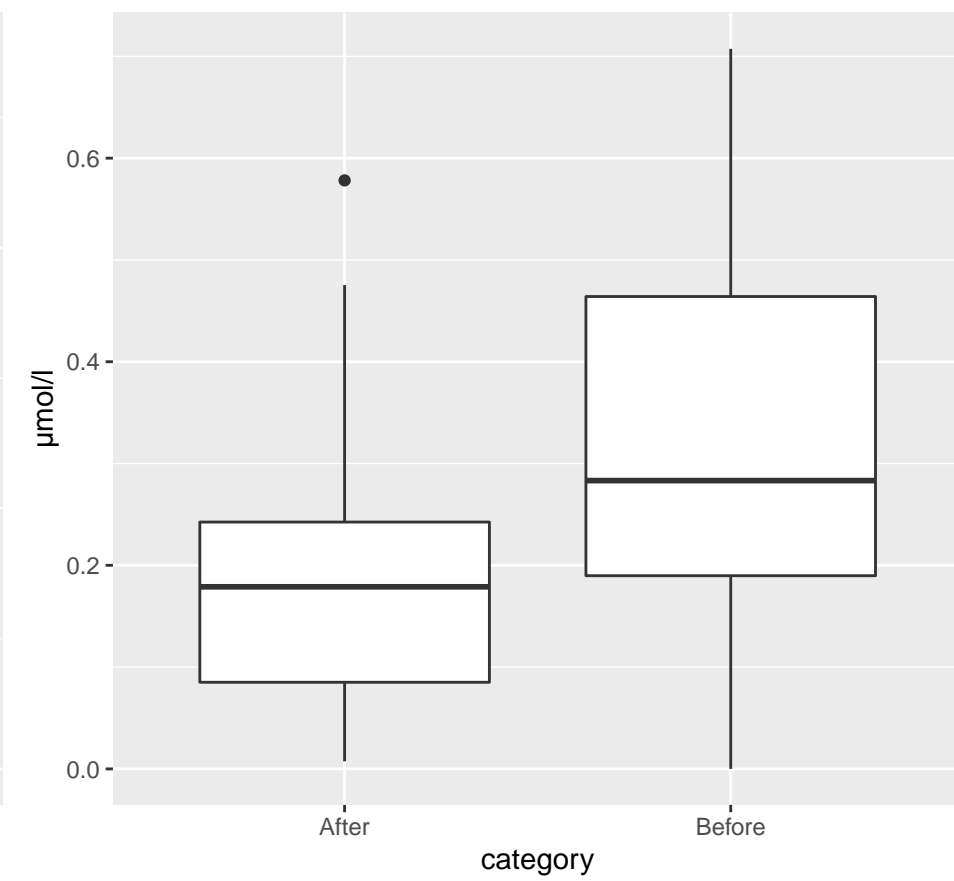

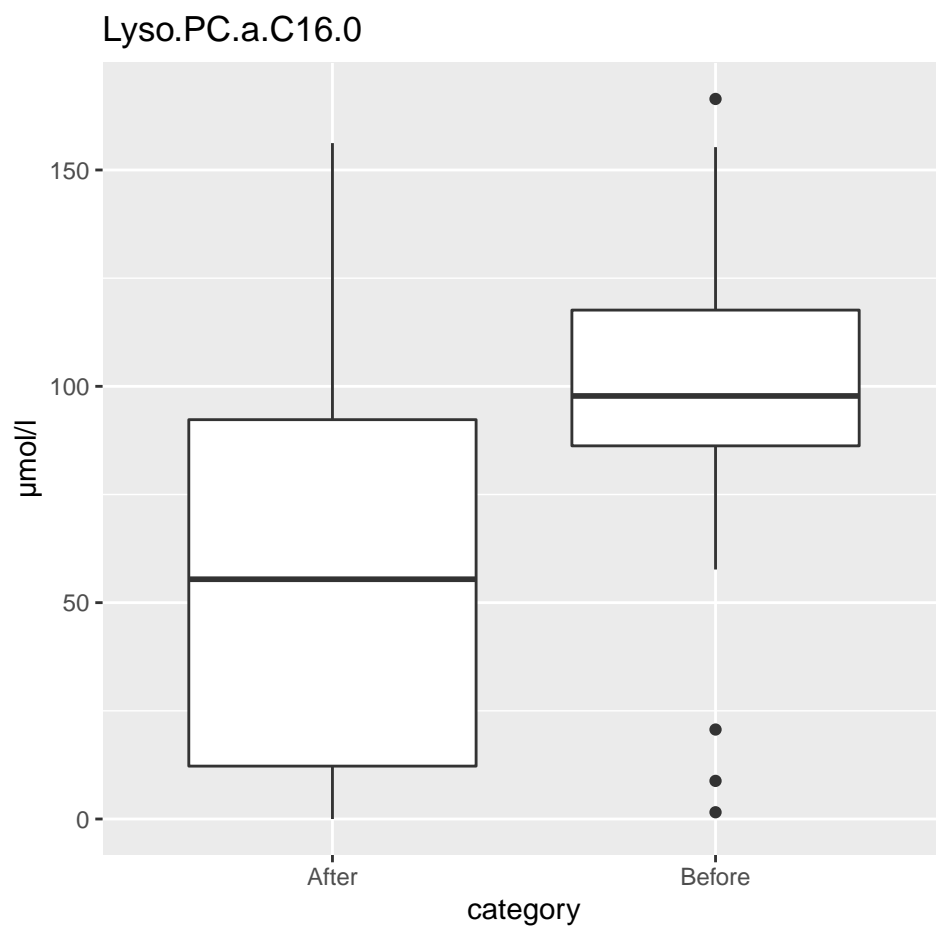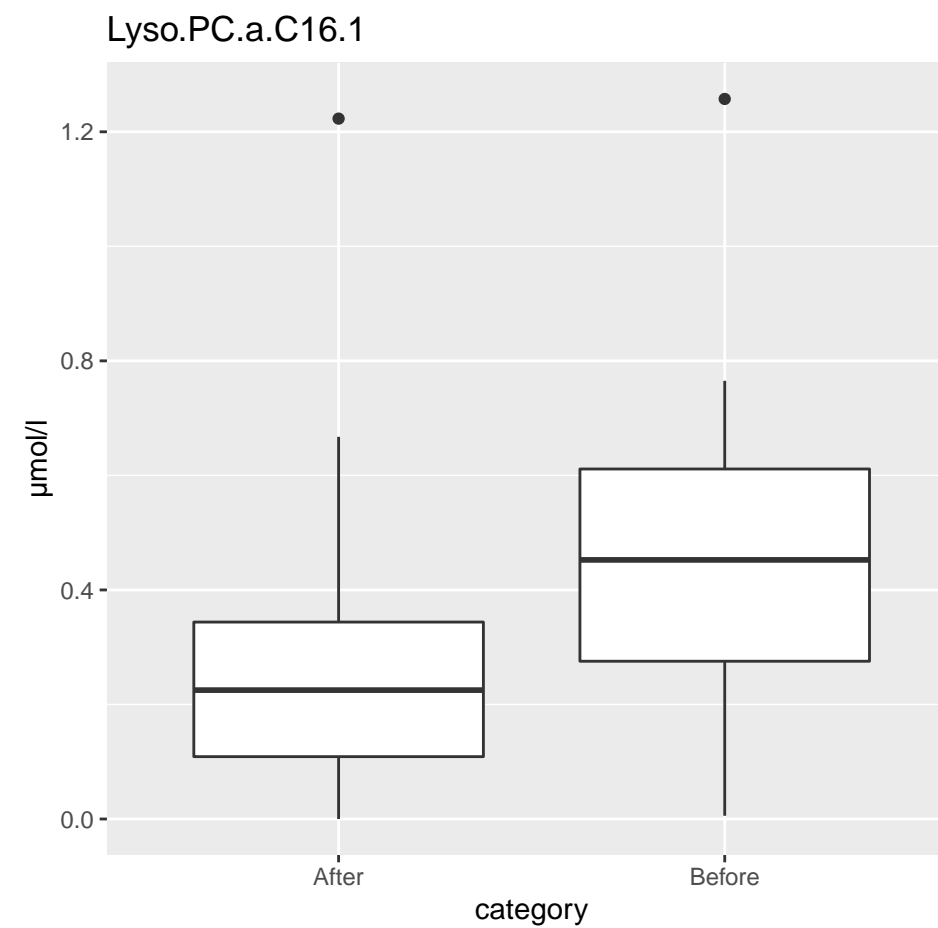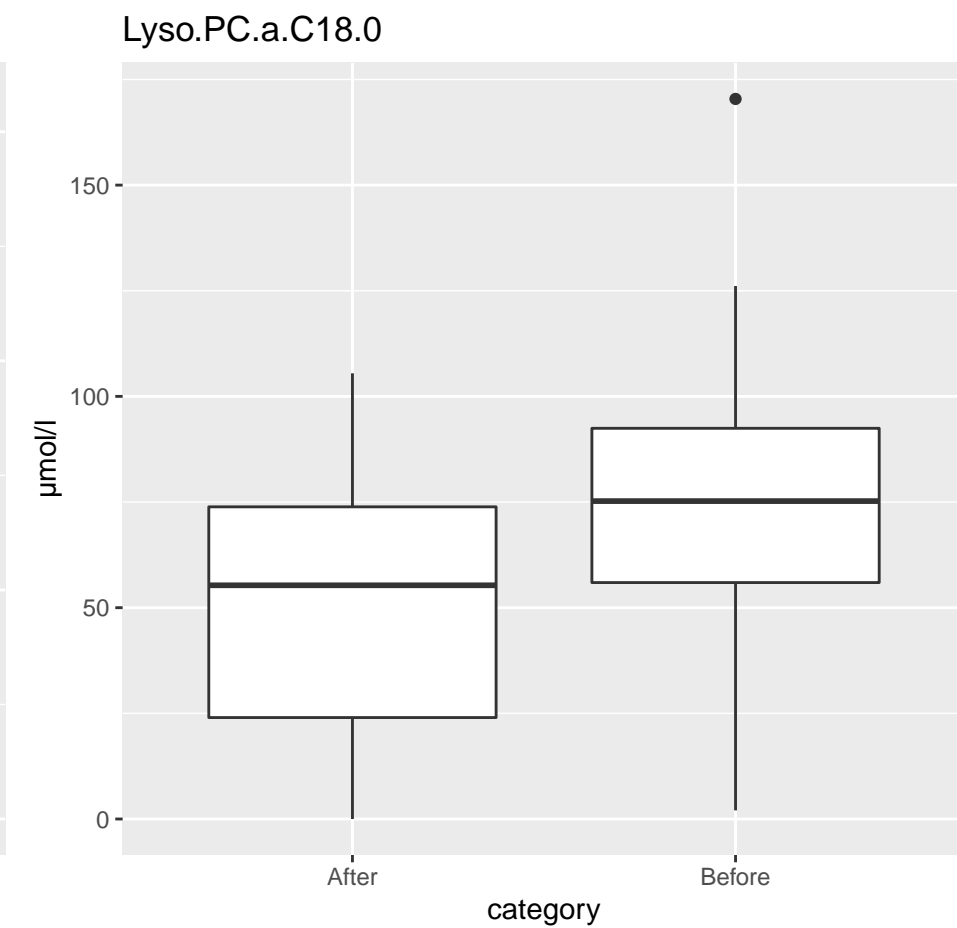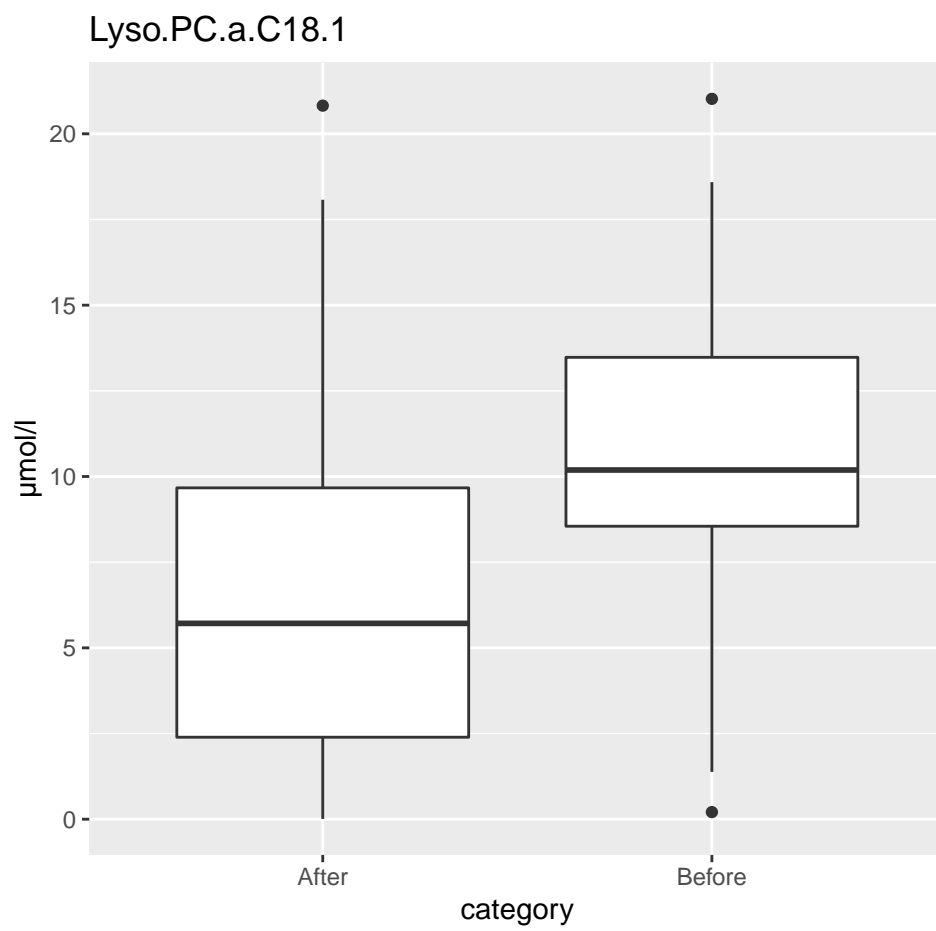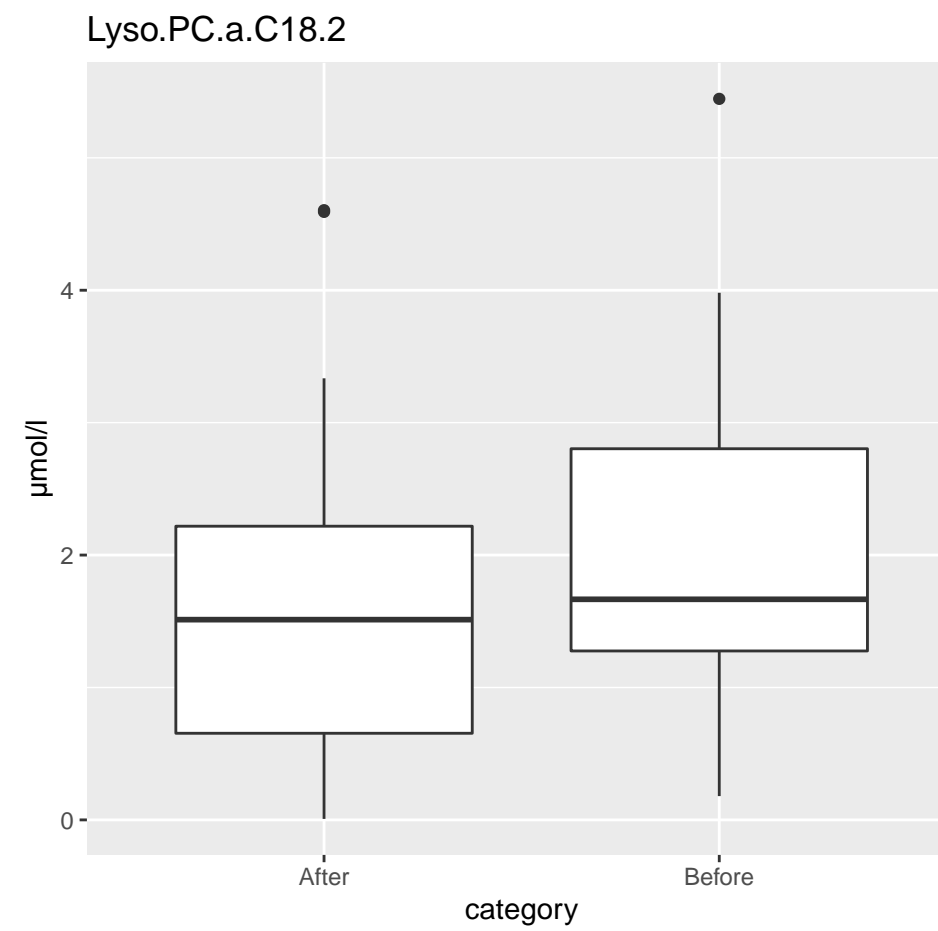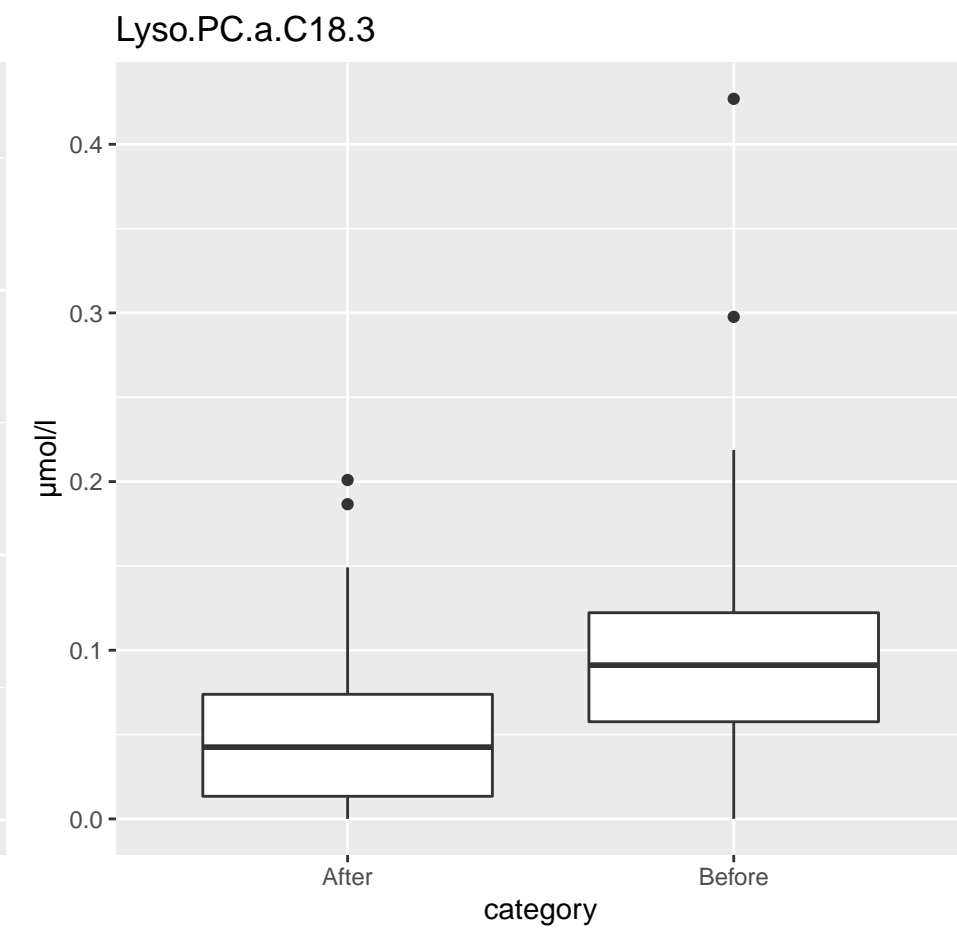

Lyso.PC.a.C20.3

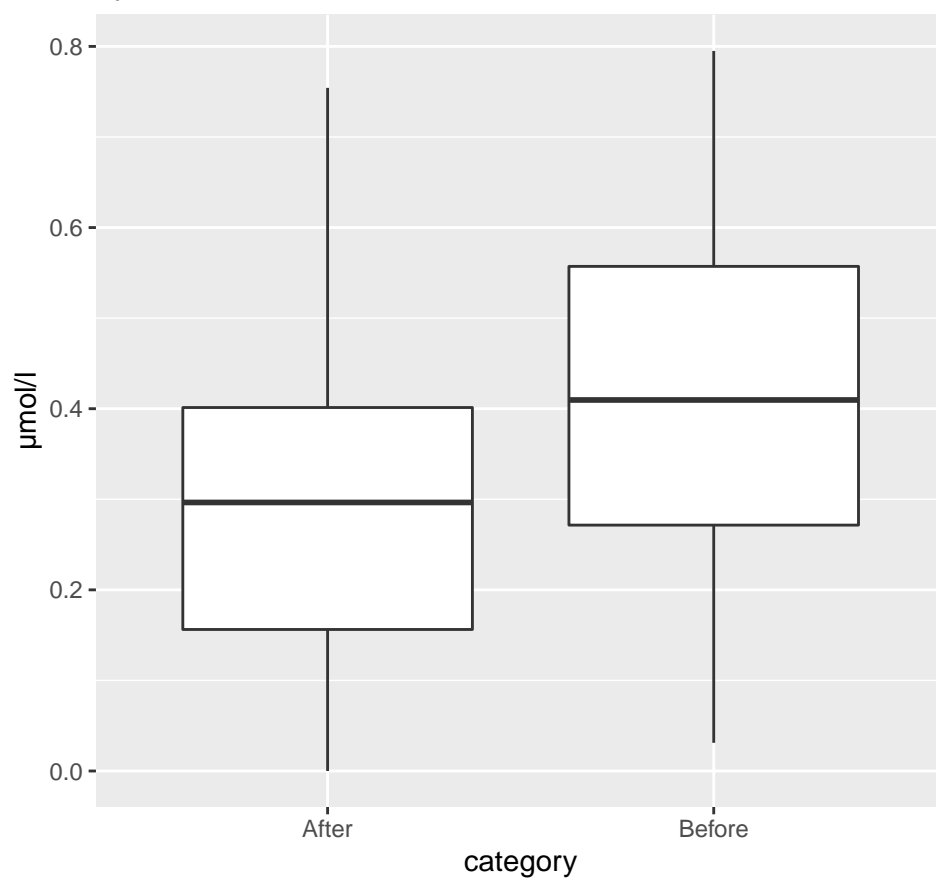

Lyso.PC.a.C20.4

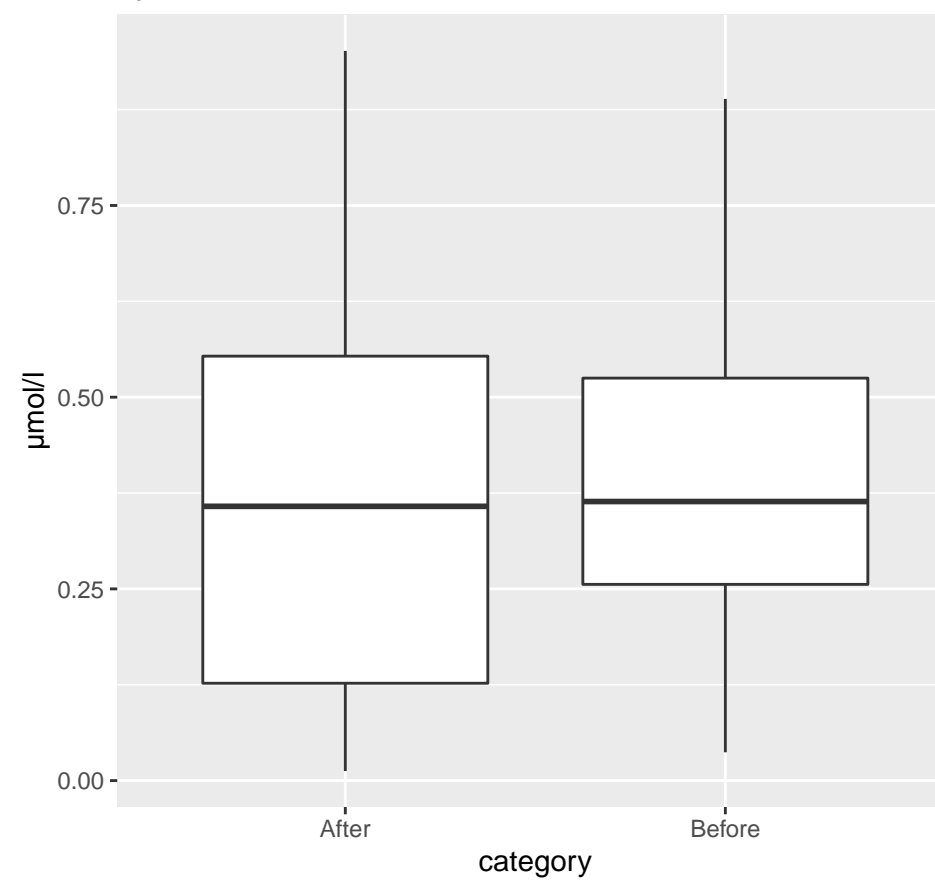

Lyso.PC.a.C20.5

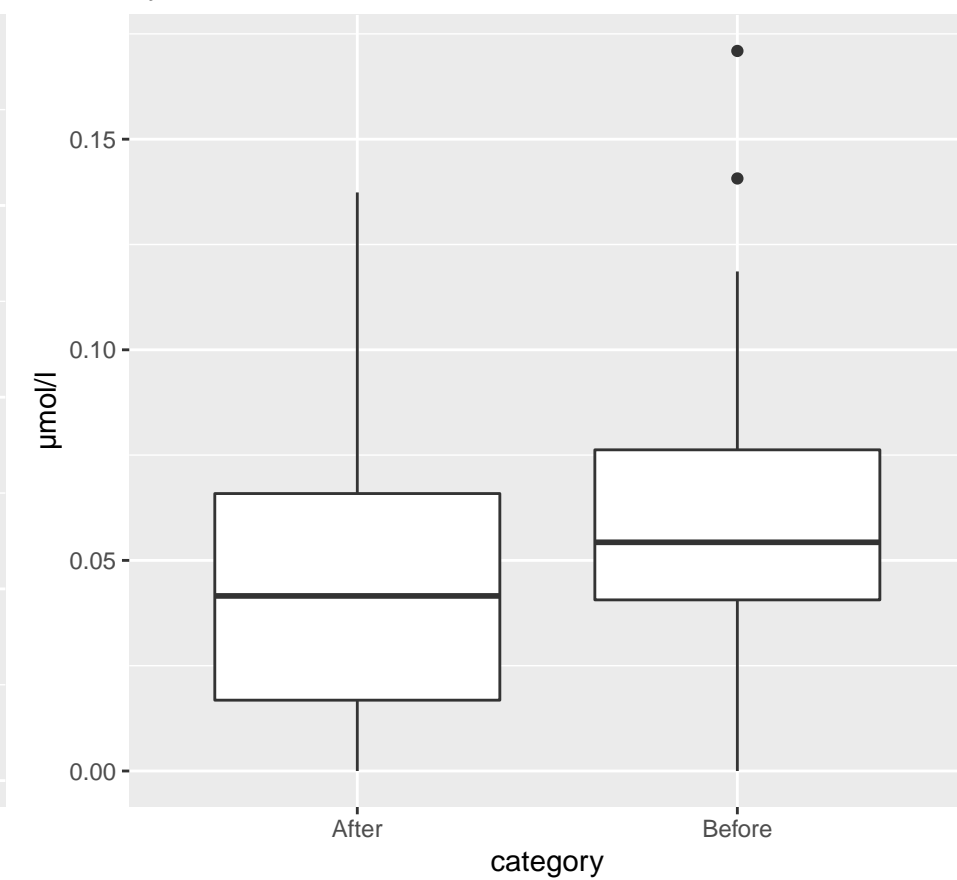

Lyso.PC.a.C22.6

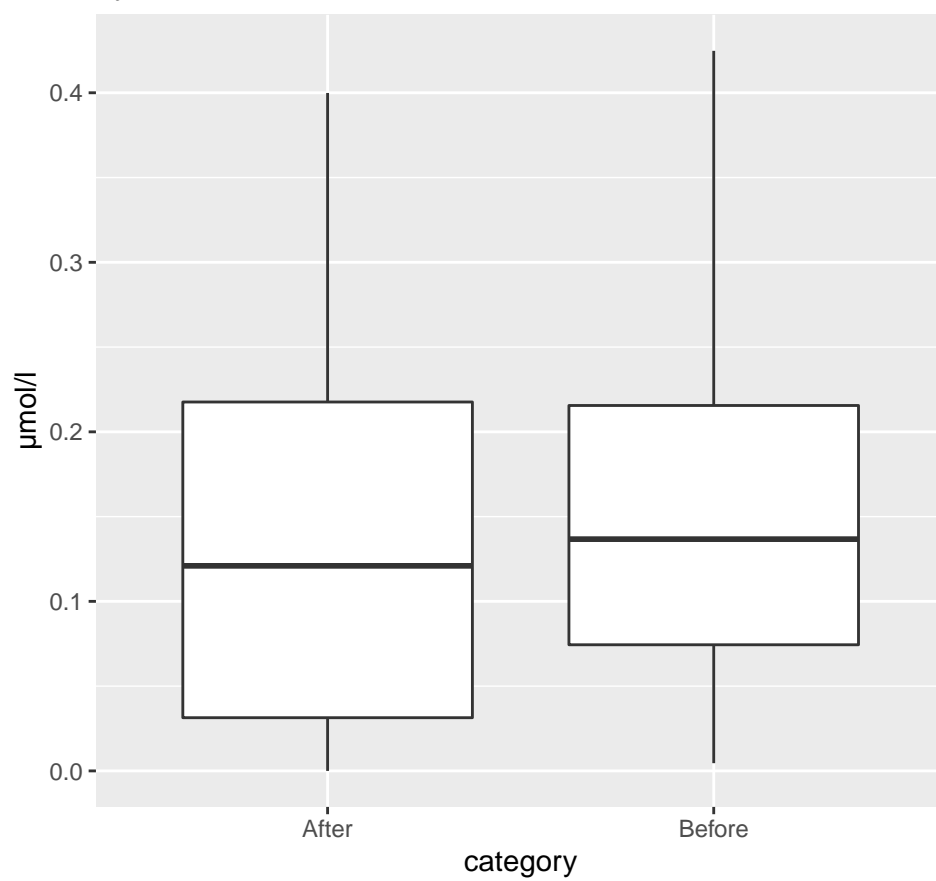

Lyso.PC.e.C16.0

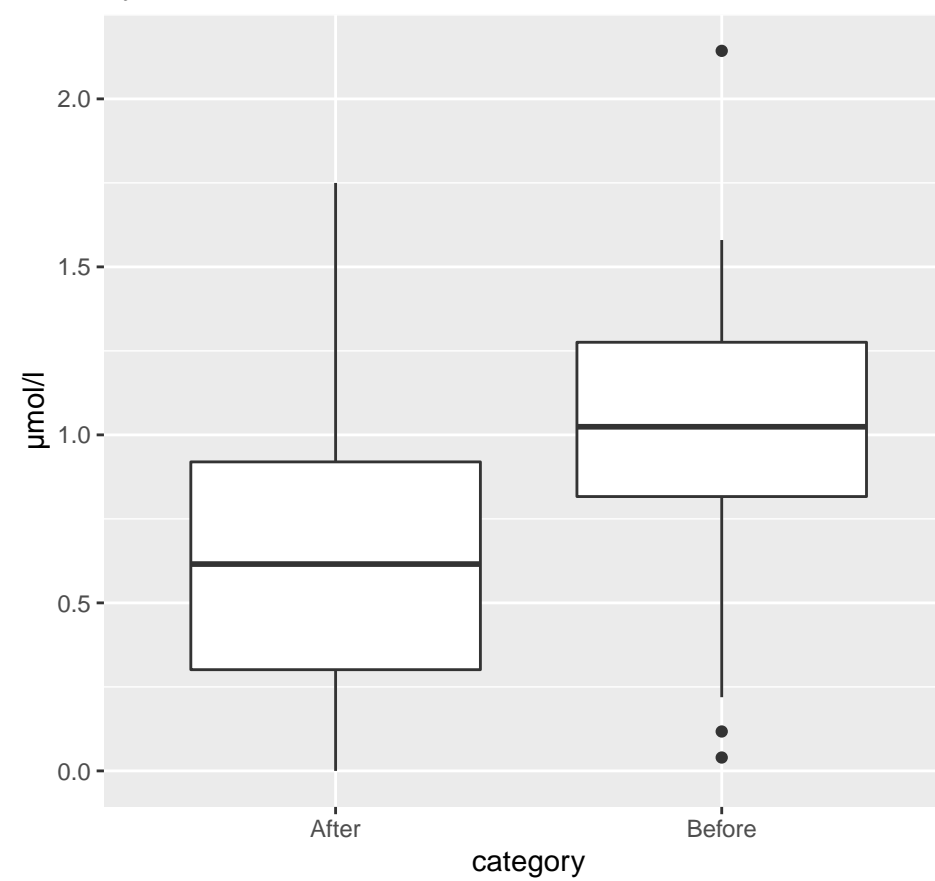

Lyso.PC.e.C18.0

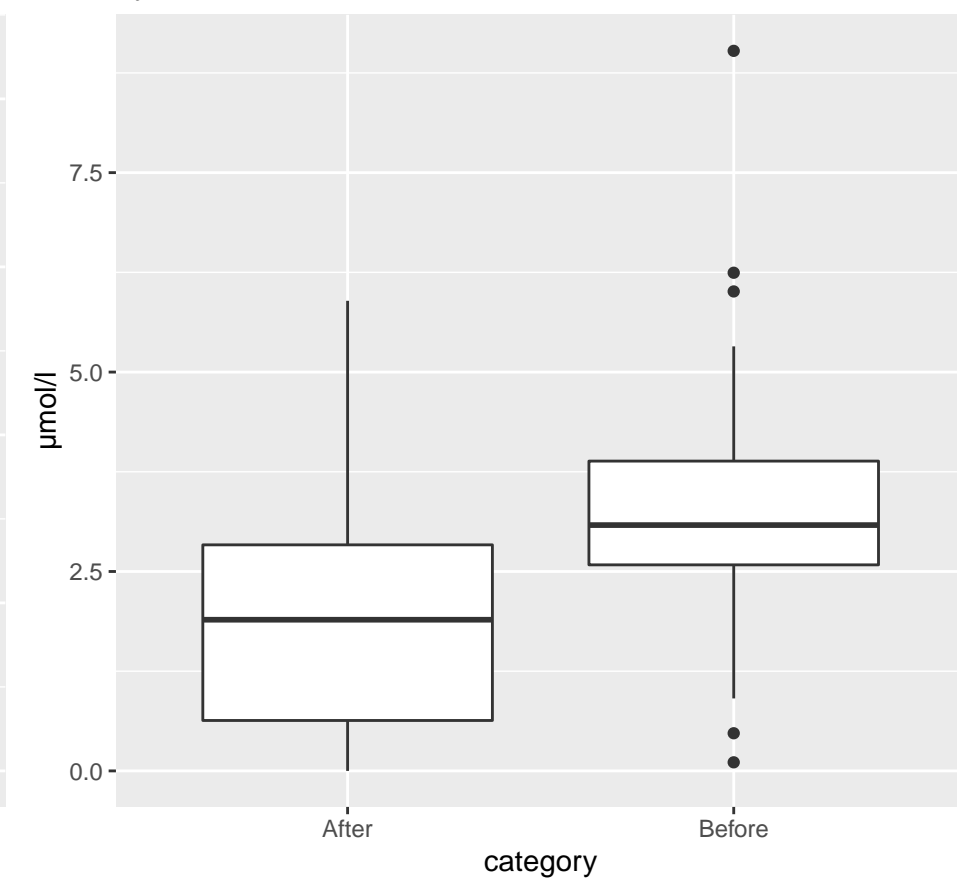

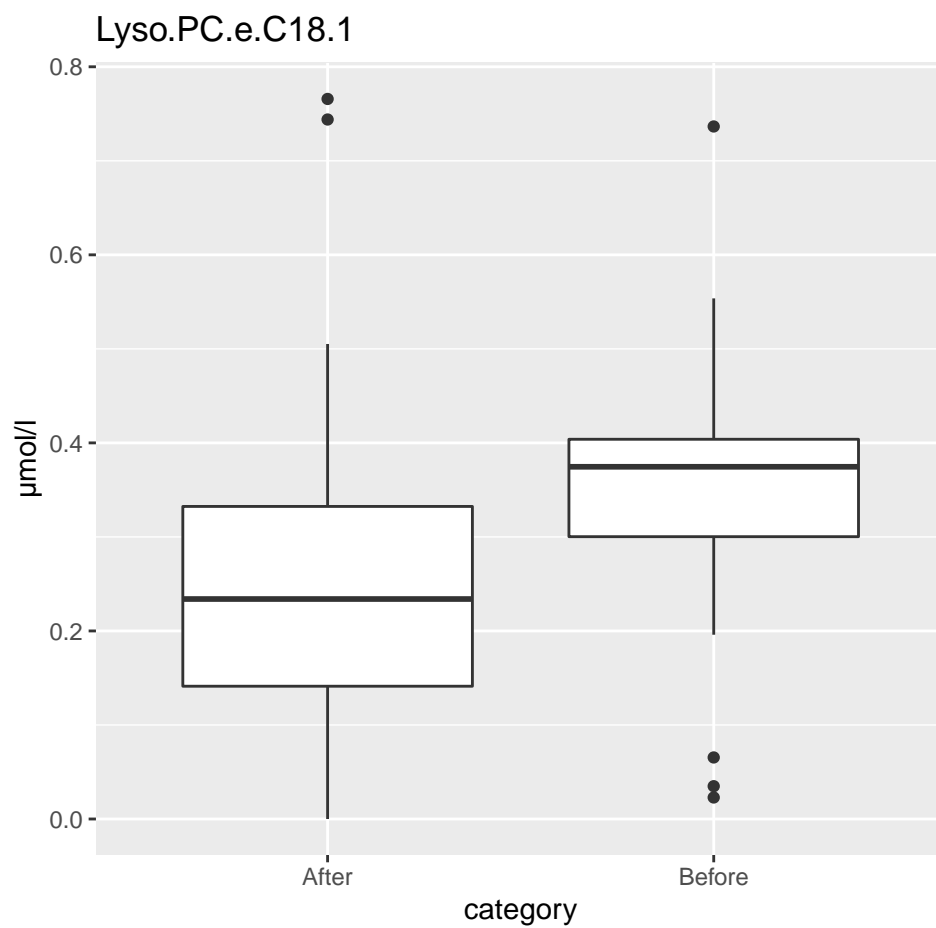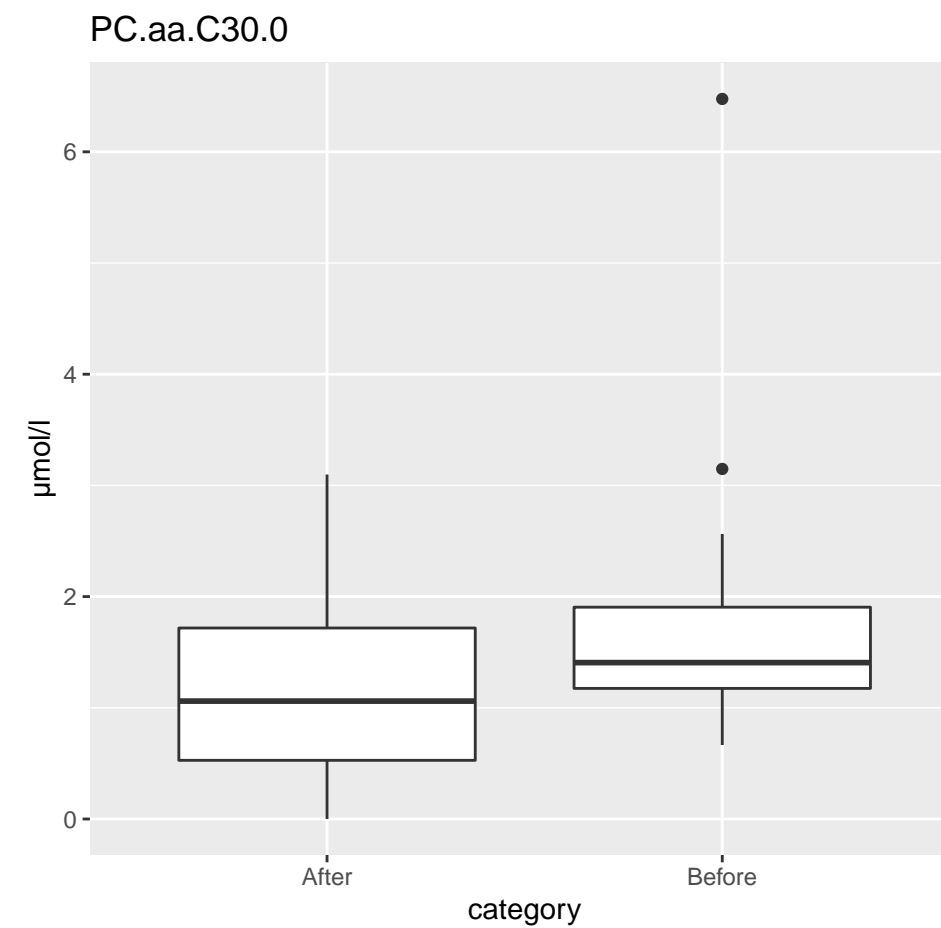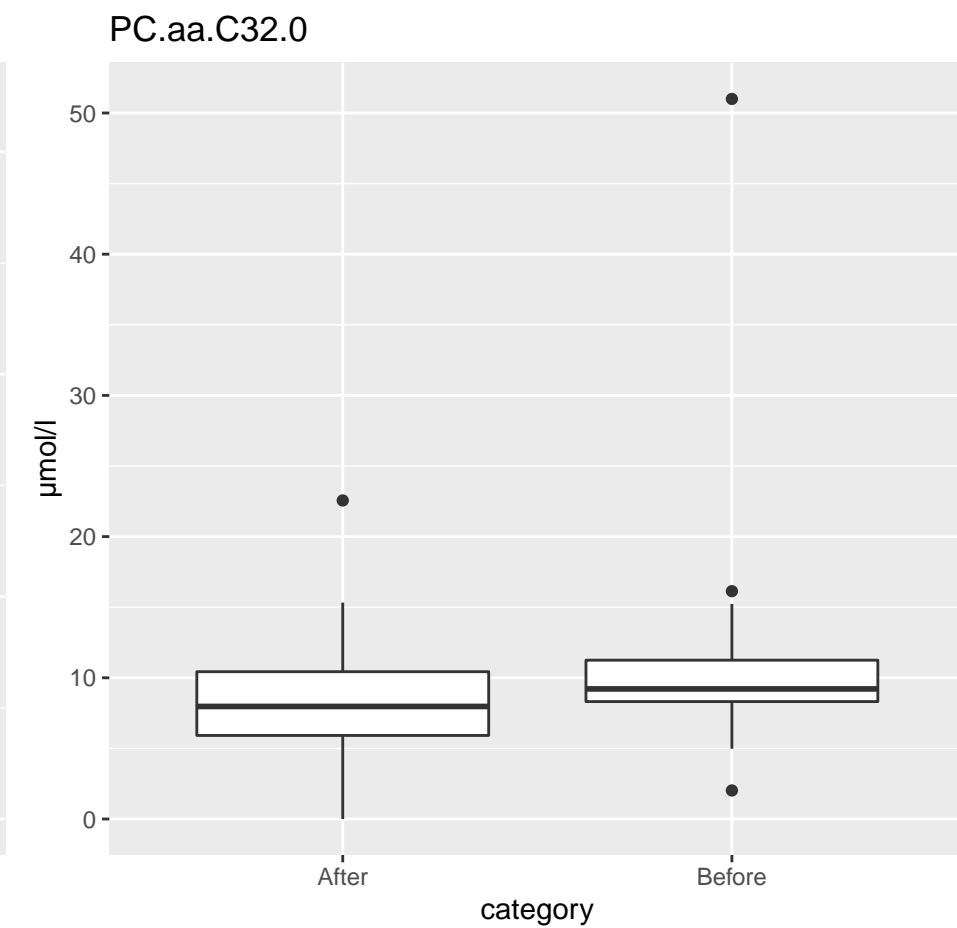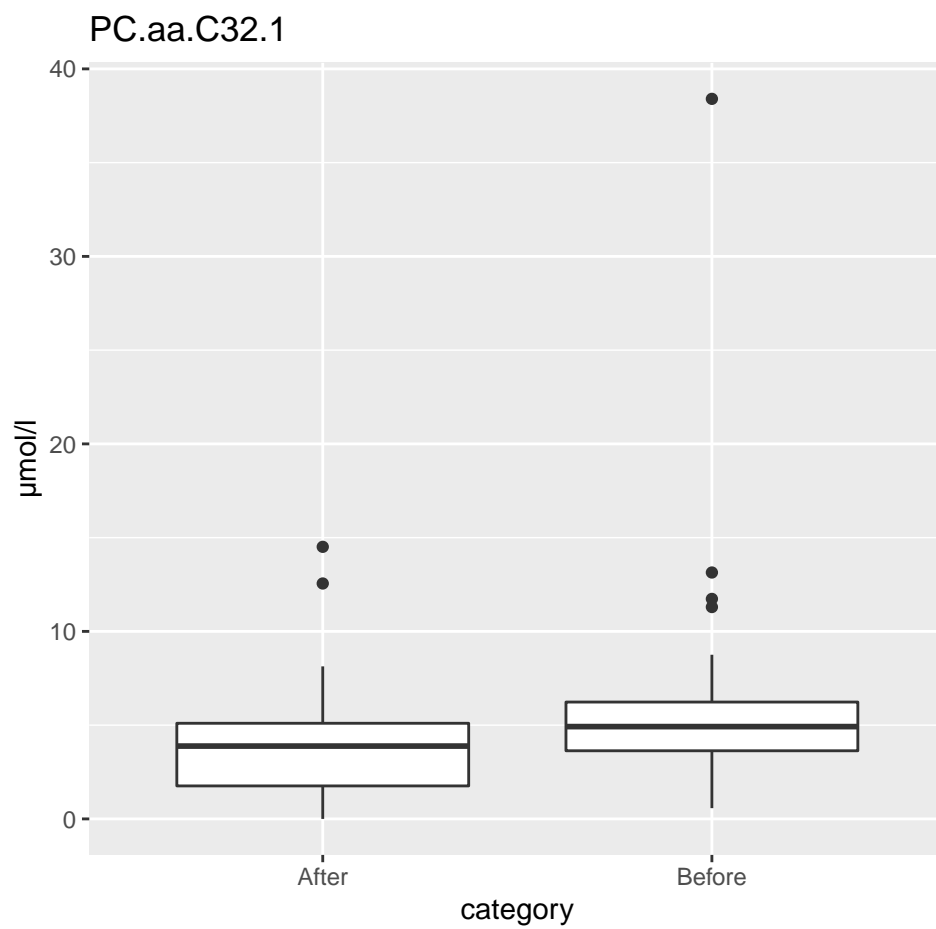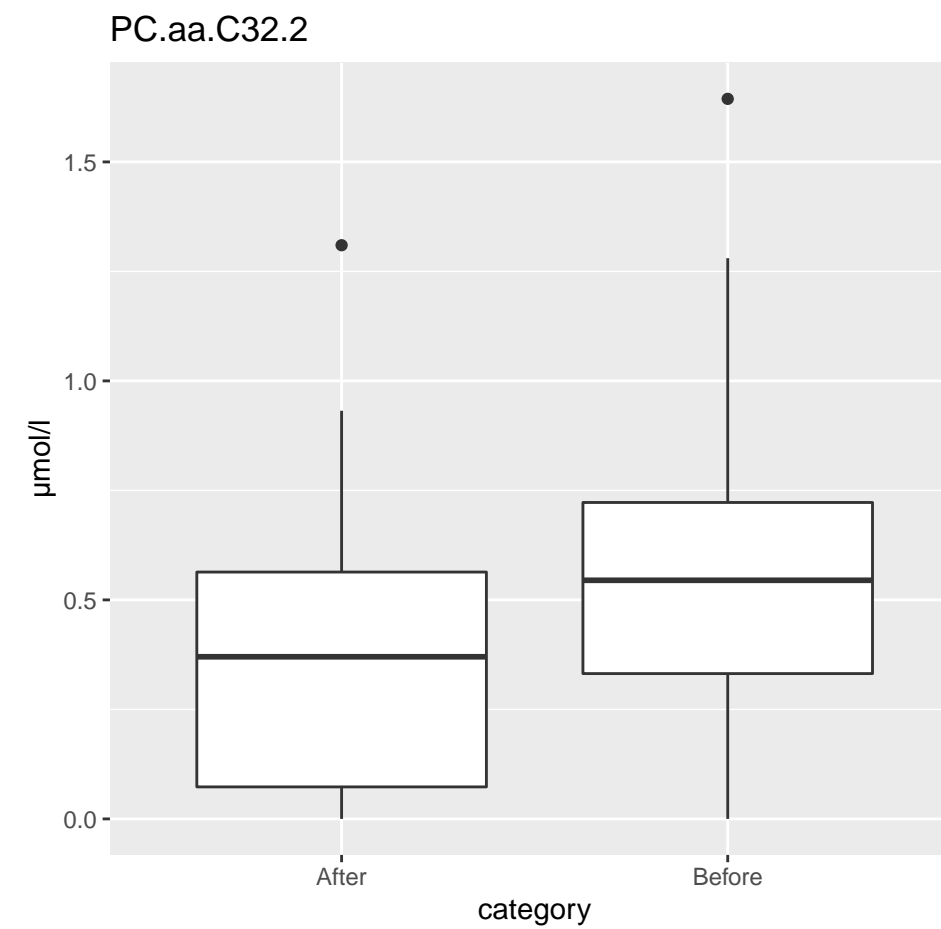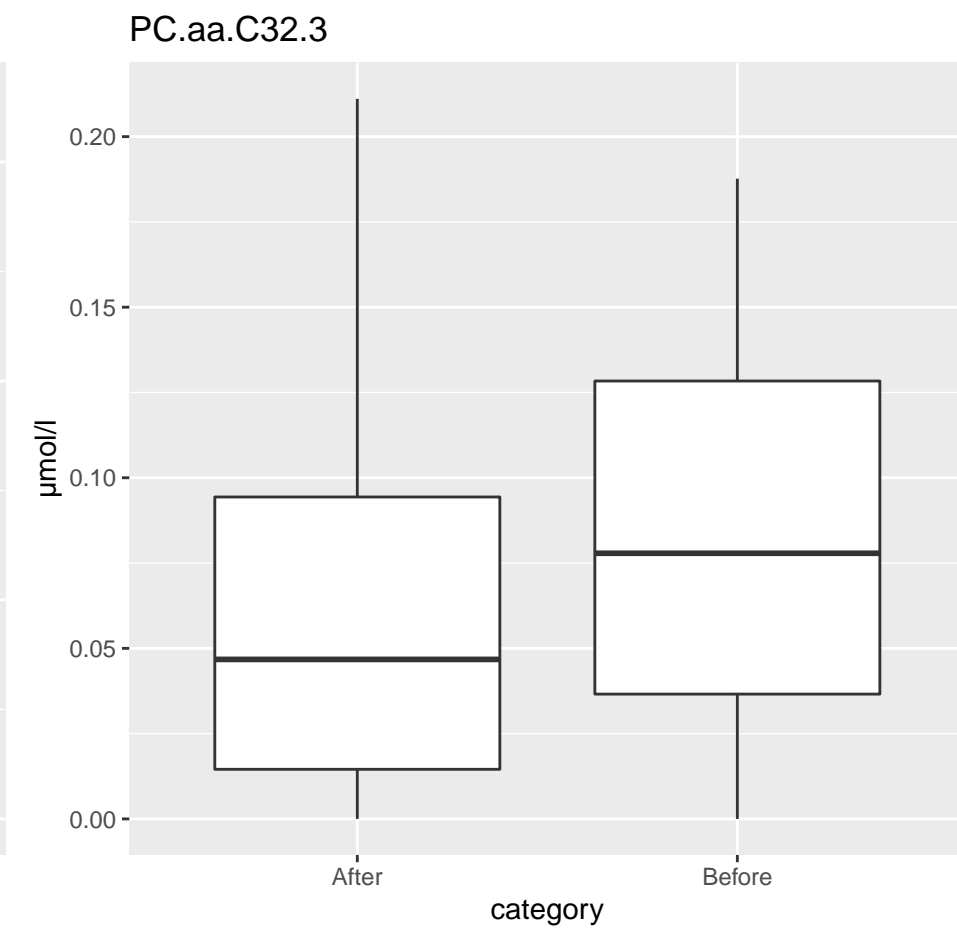

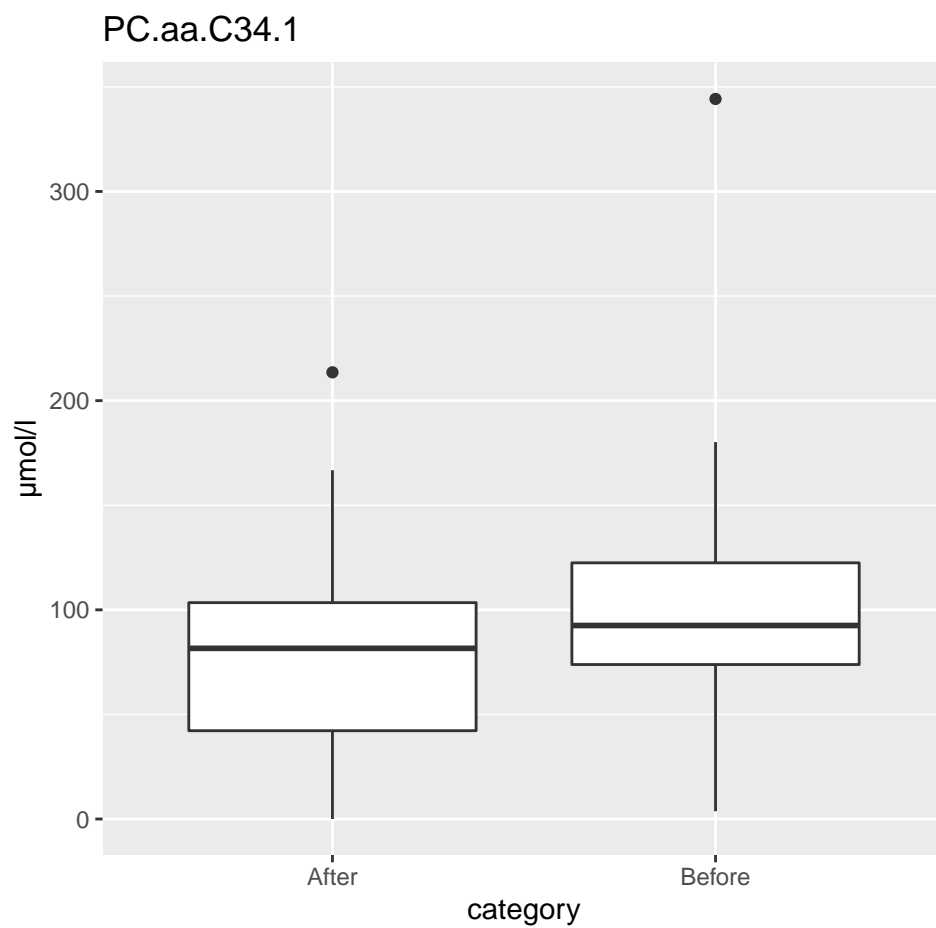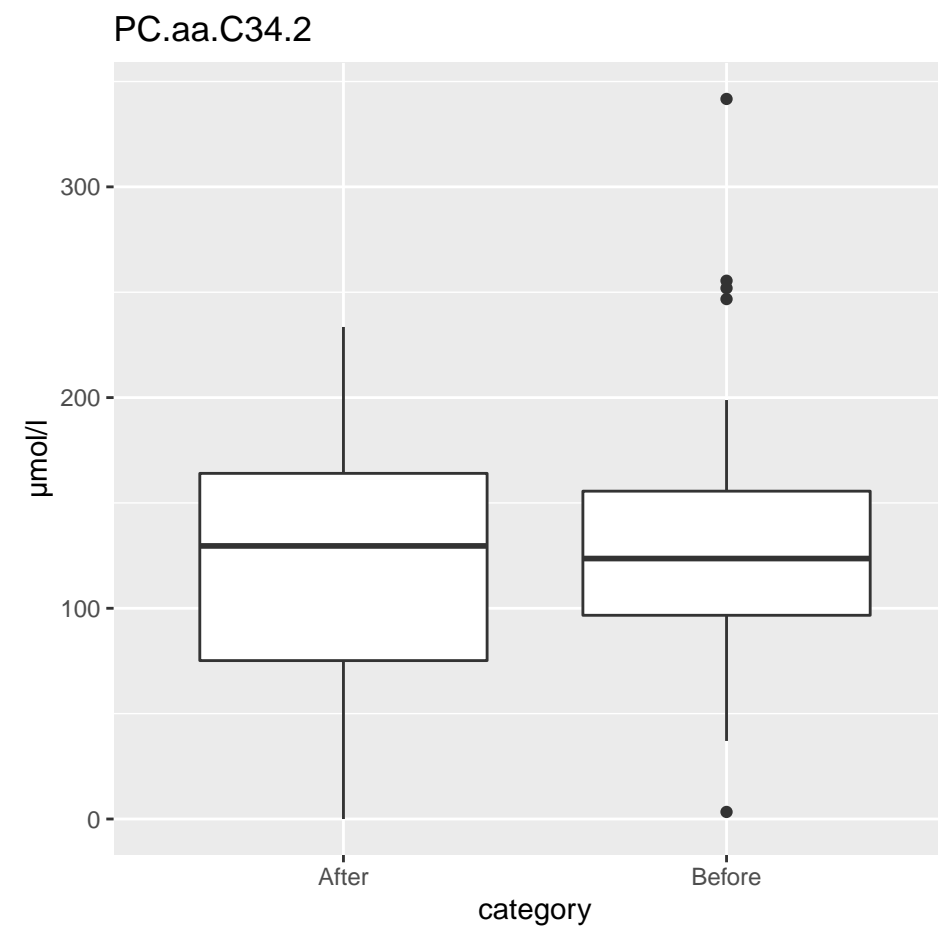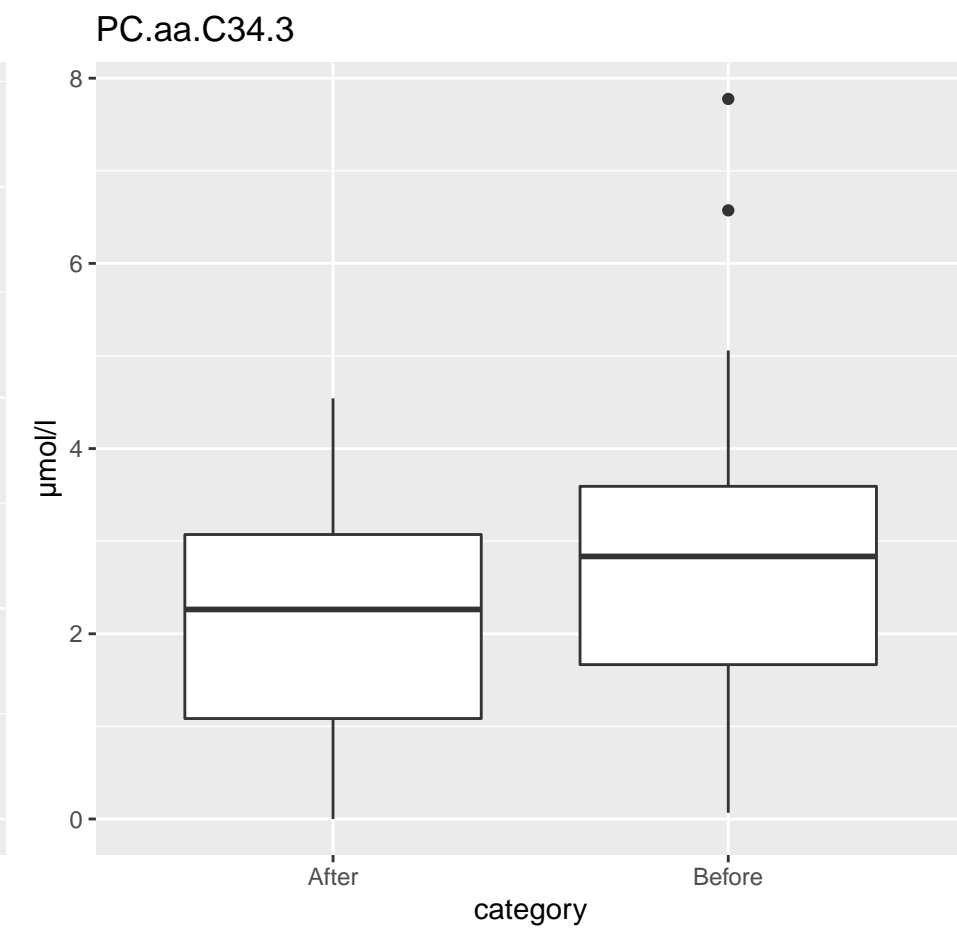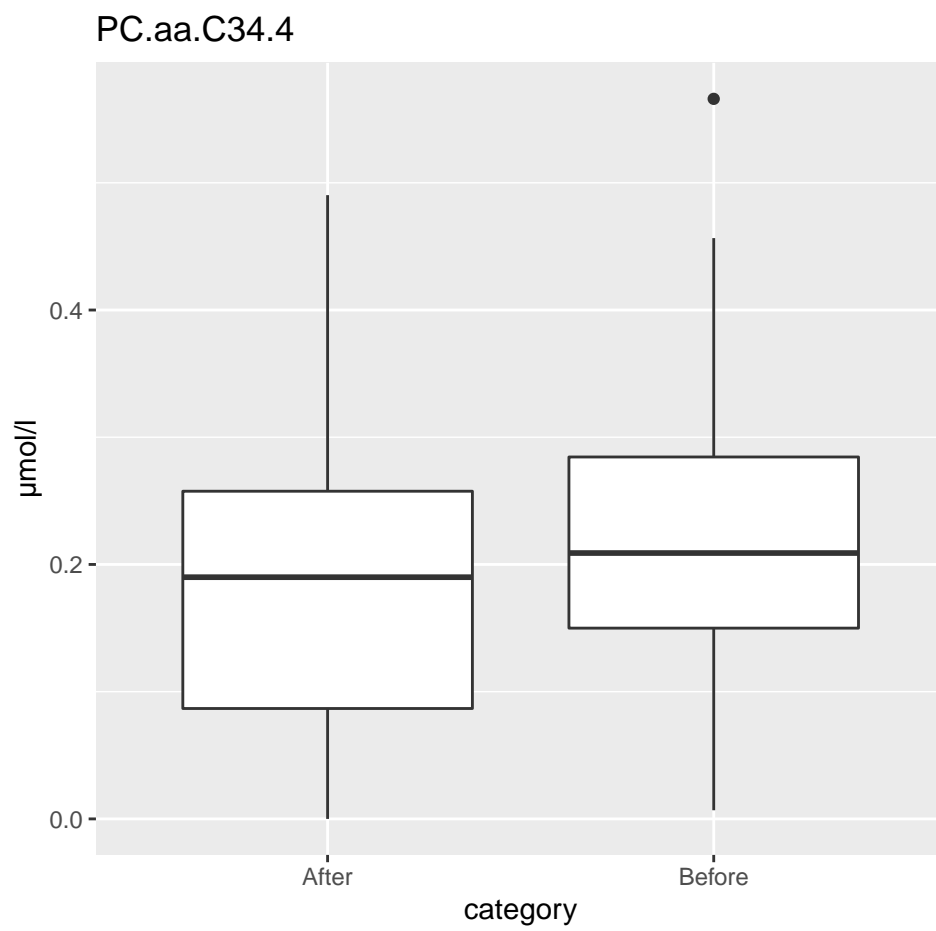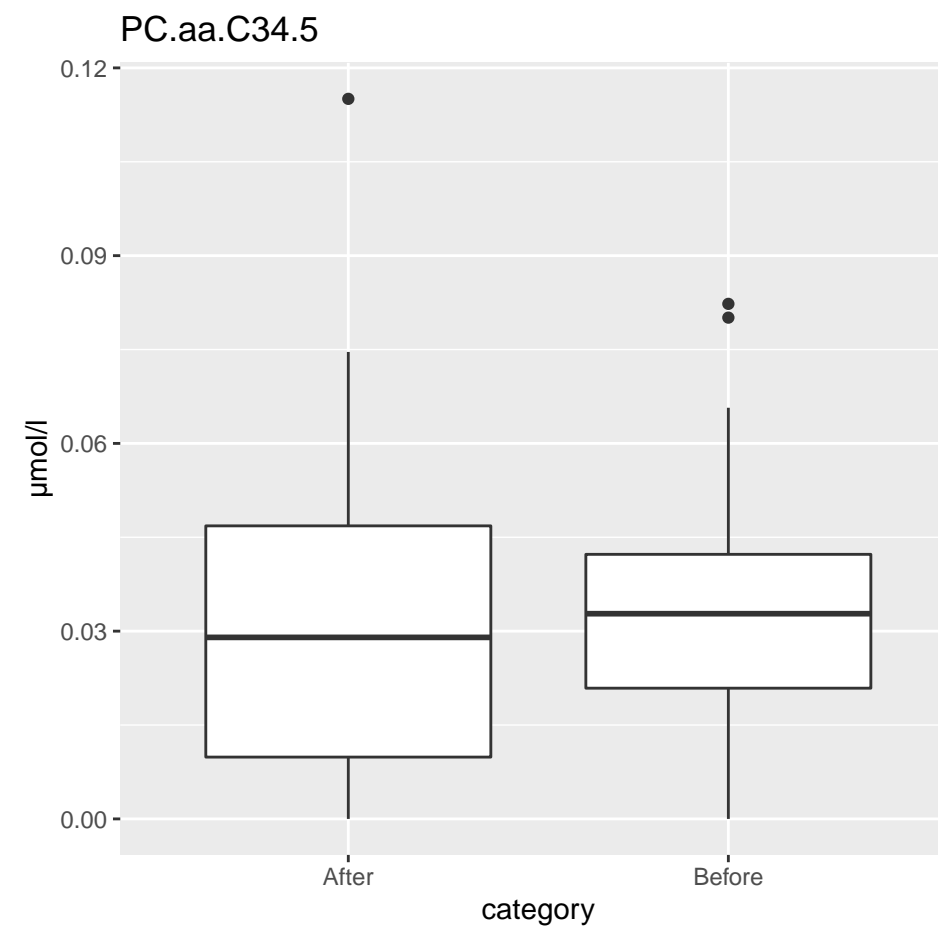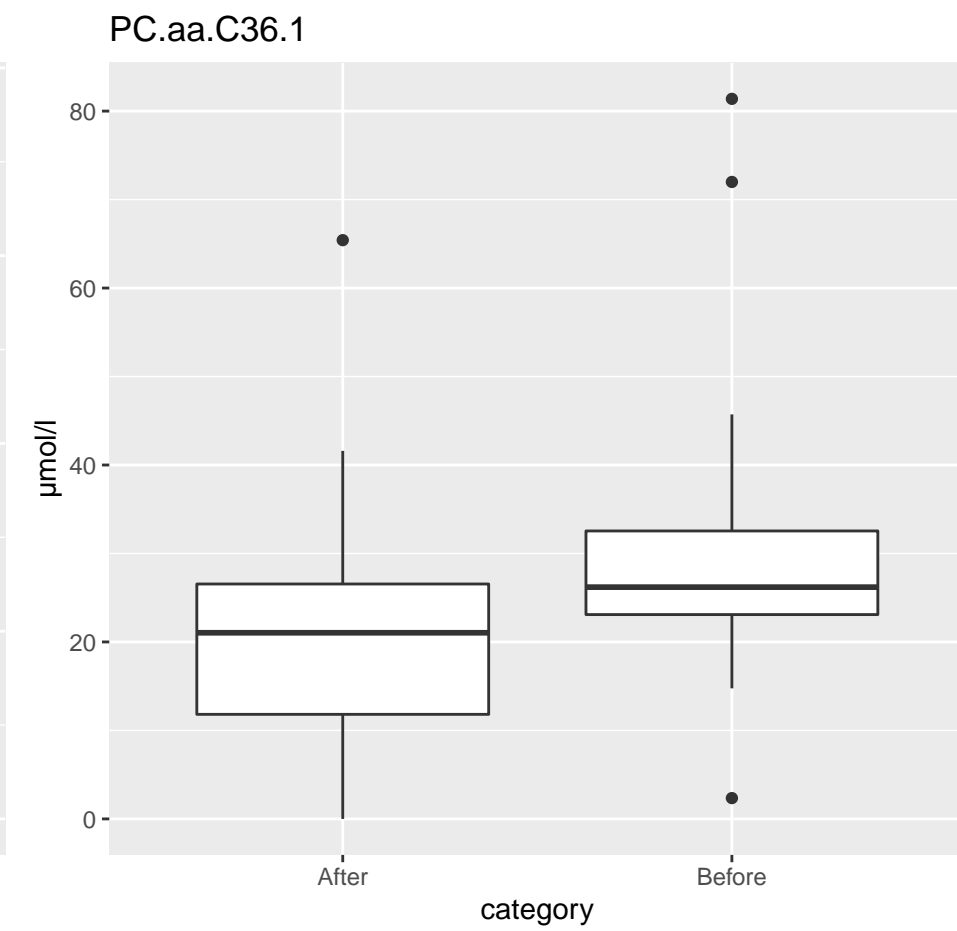

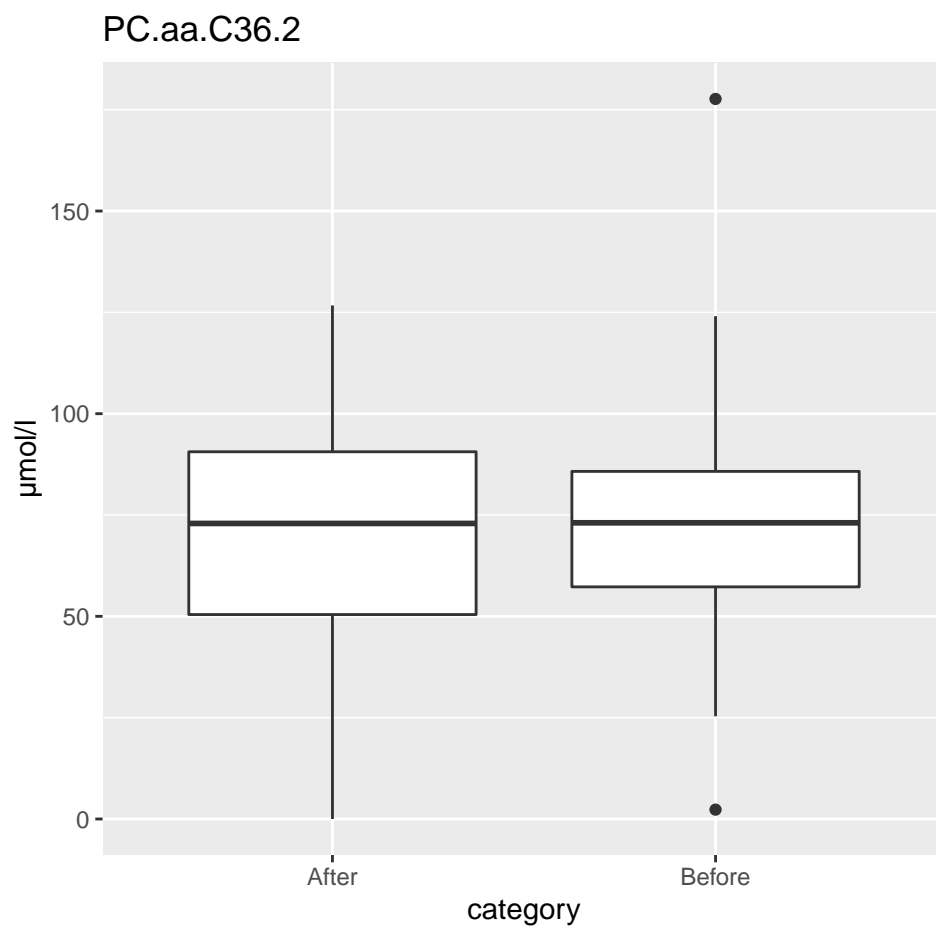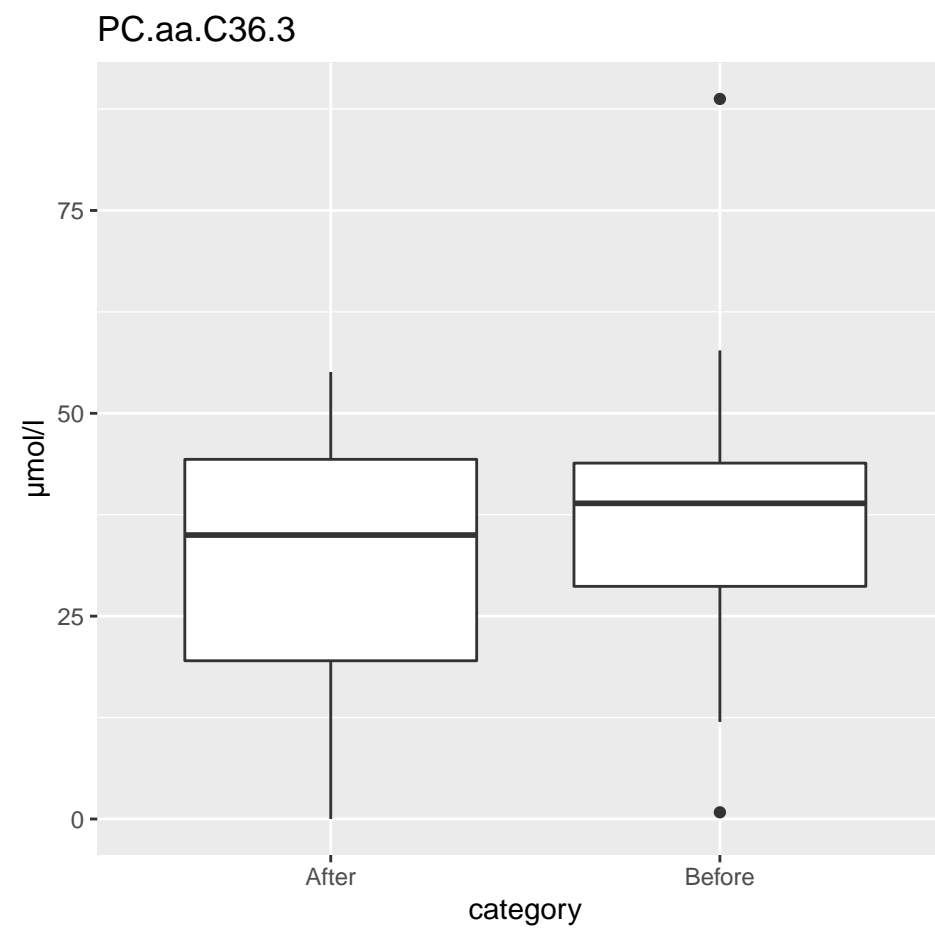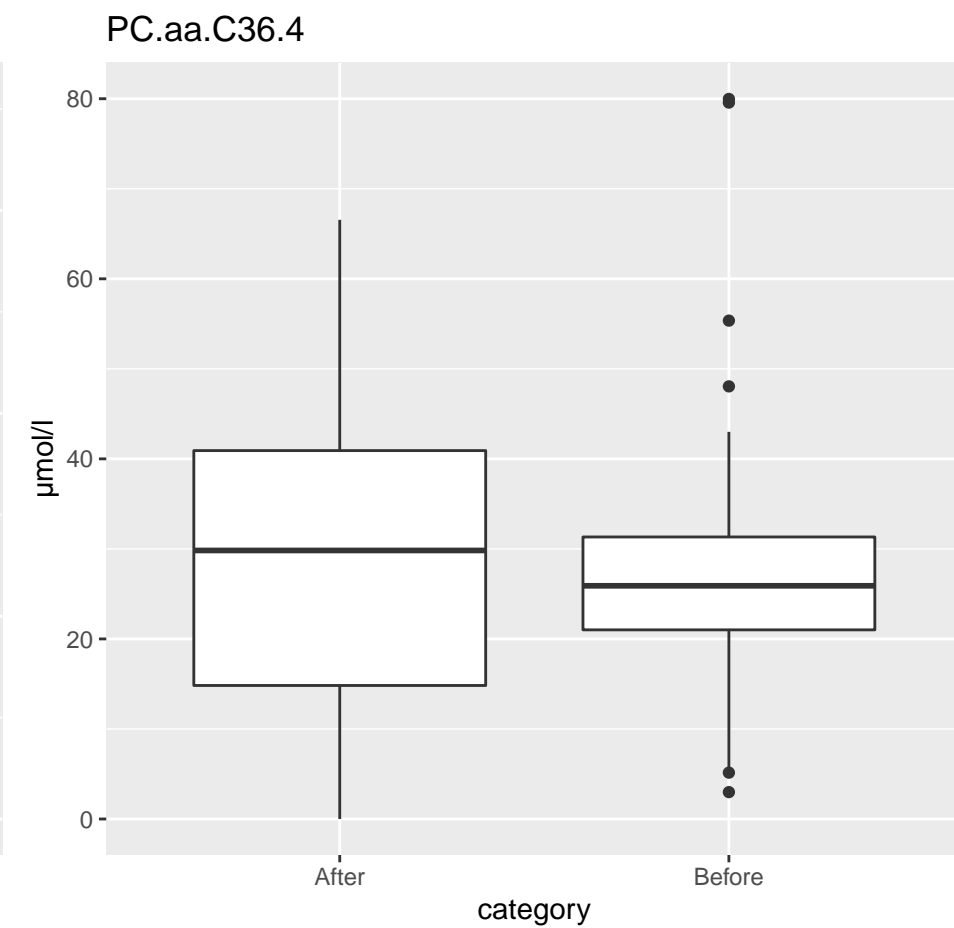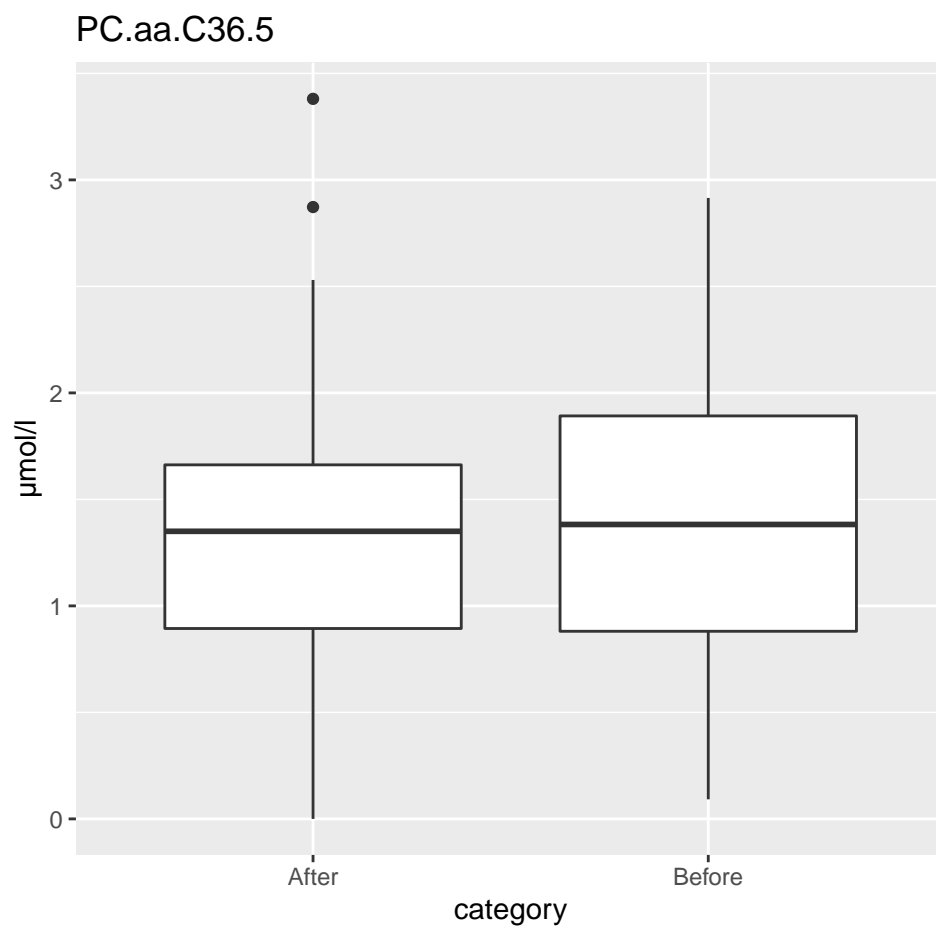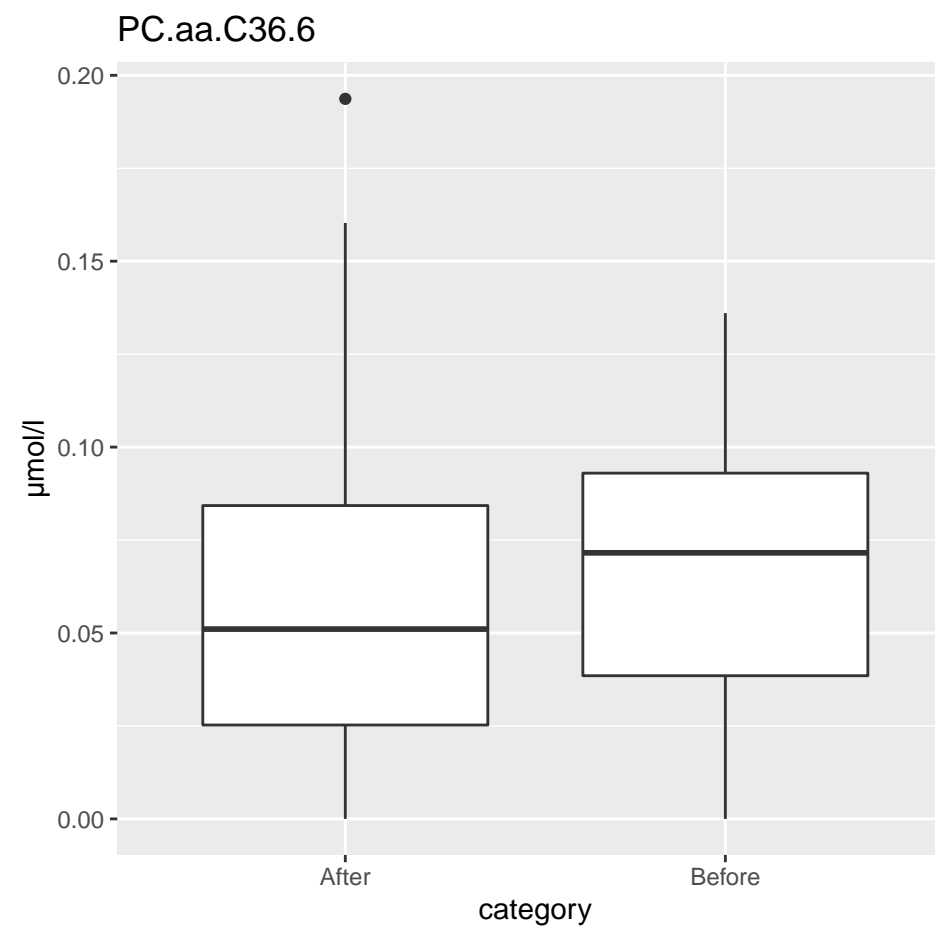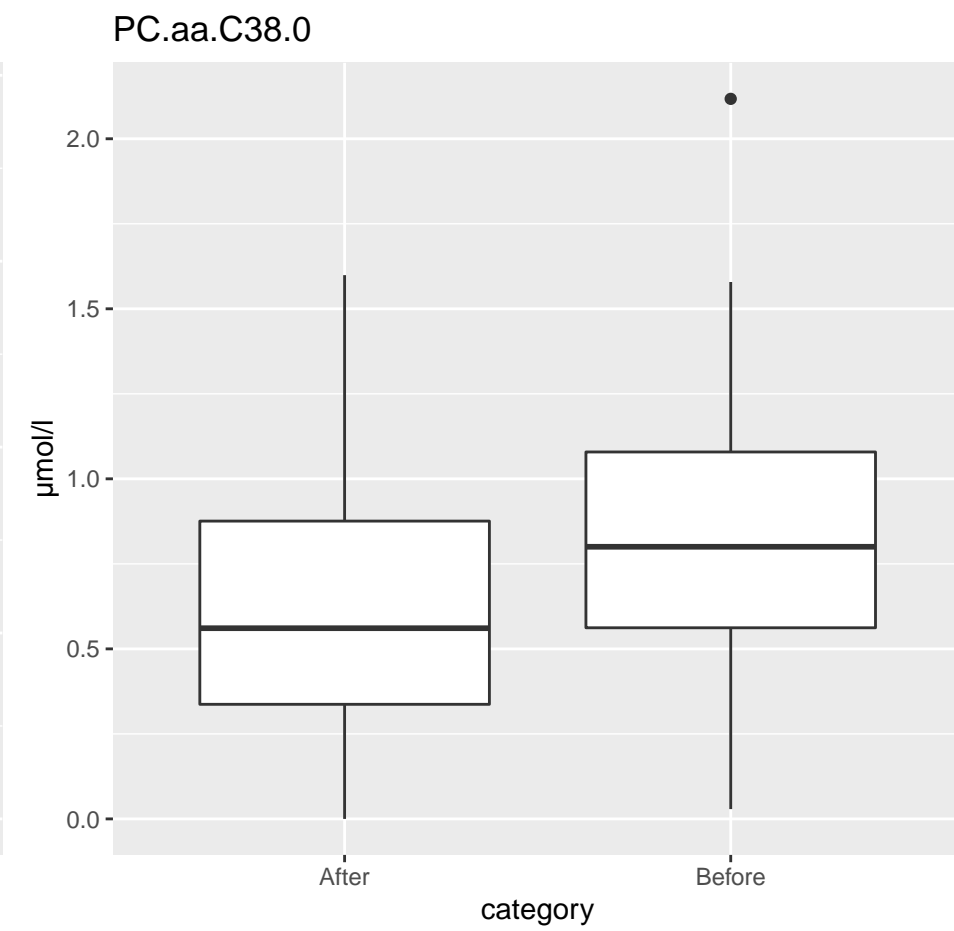

PC.aa.C38.2

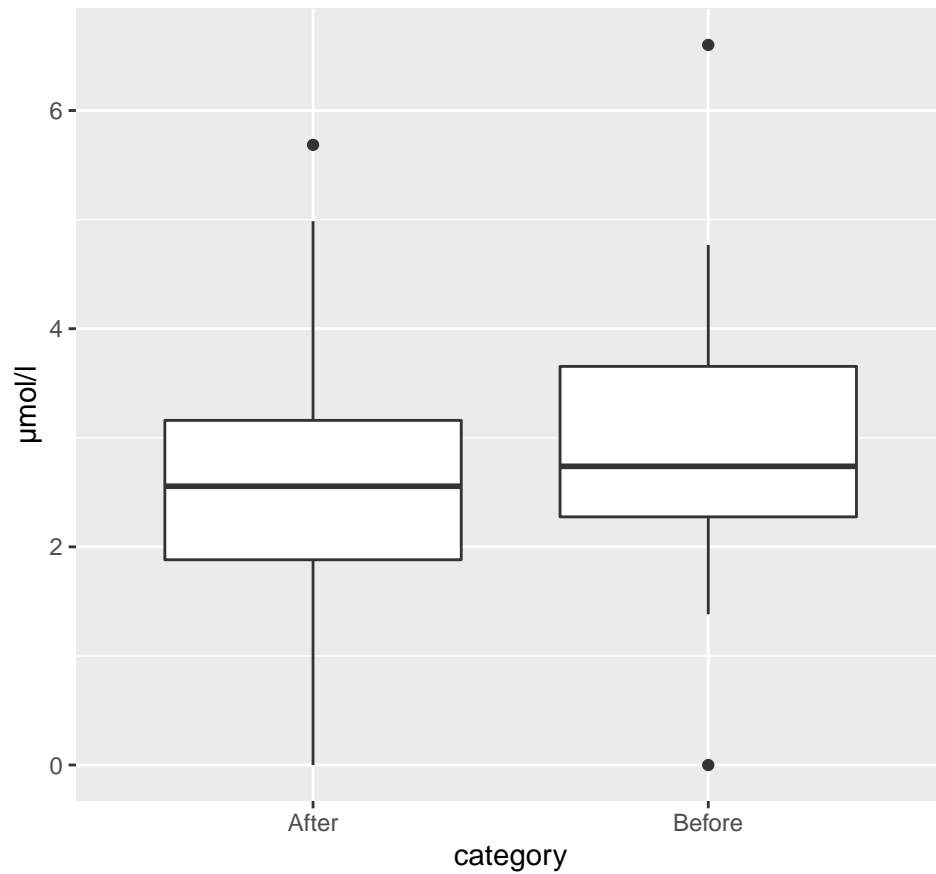

PC.aa.C38.3

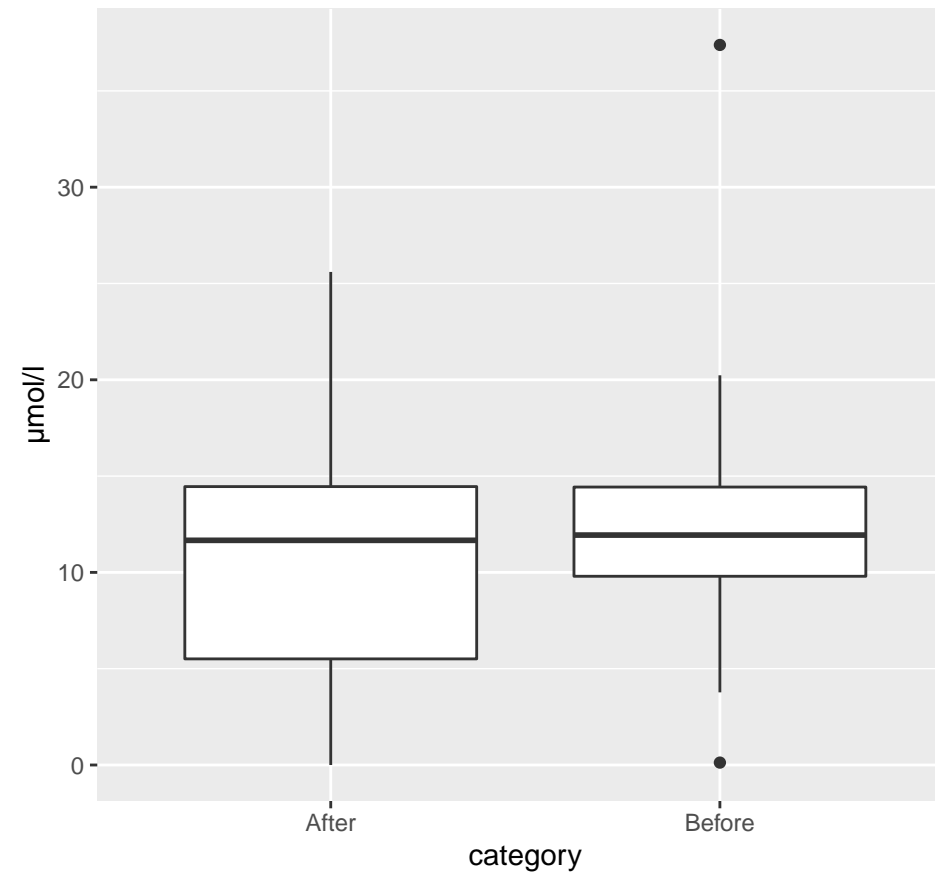

PC.aa.C38.4

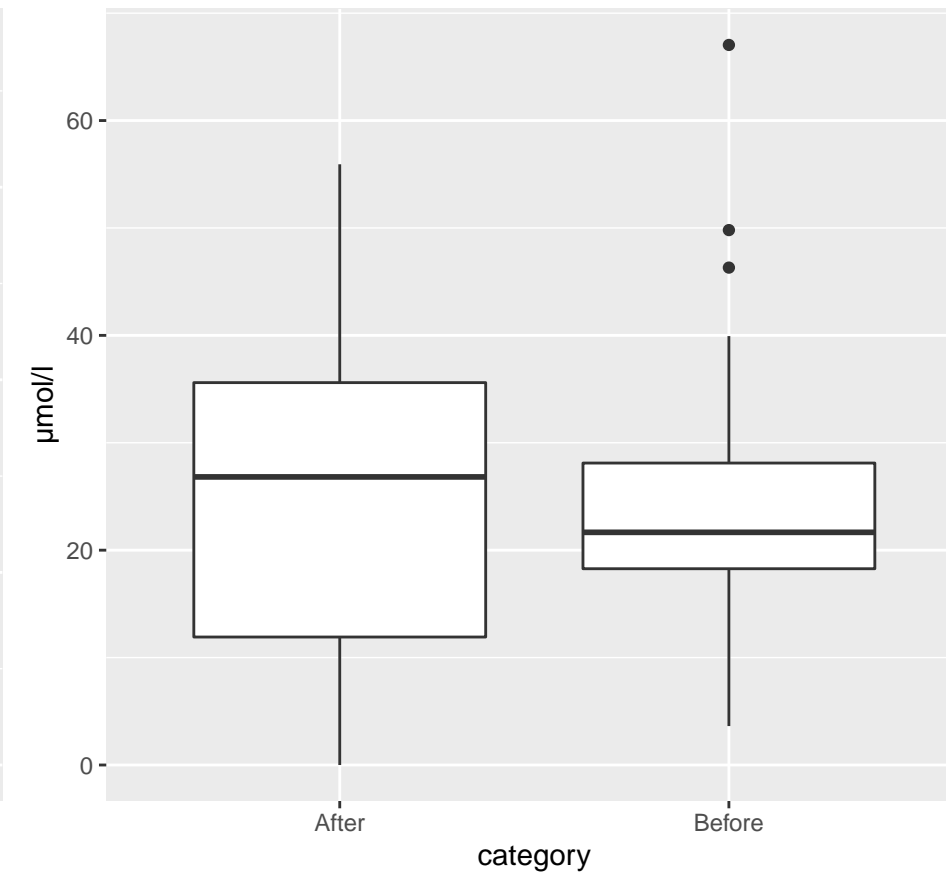

PC.aa.C38.5

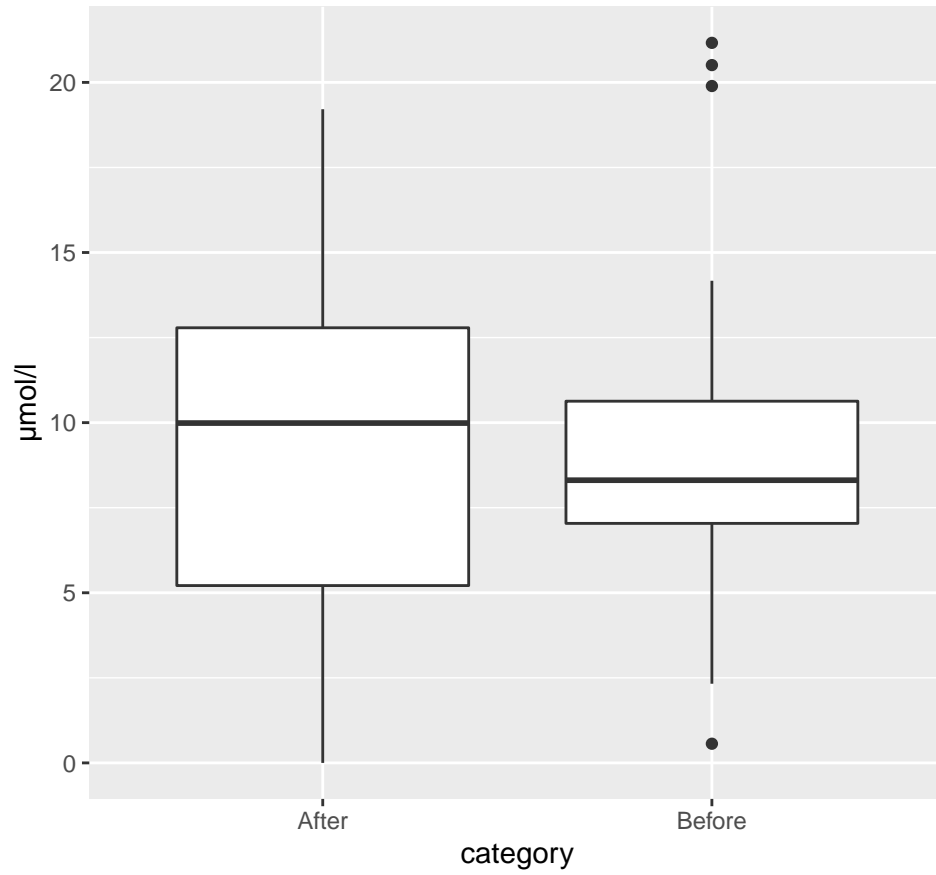

PC.aa.C38.6

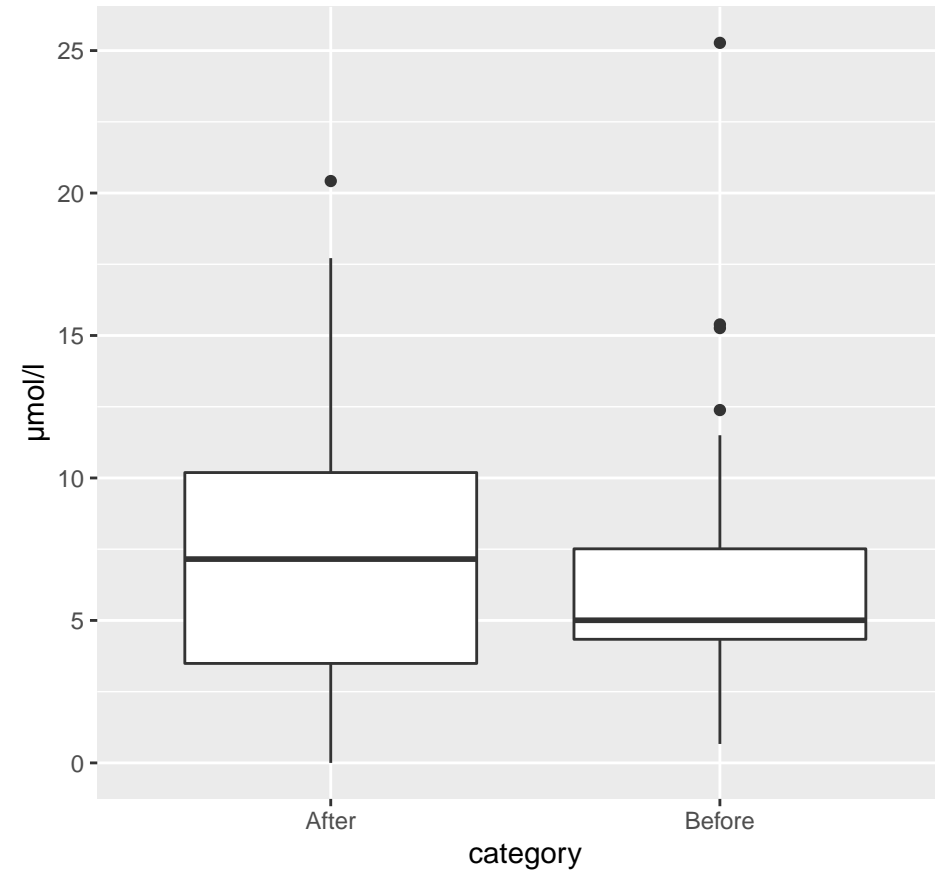

PC.aa.C40.4

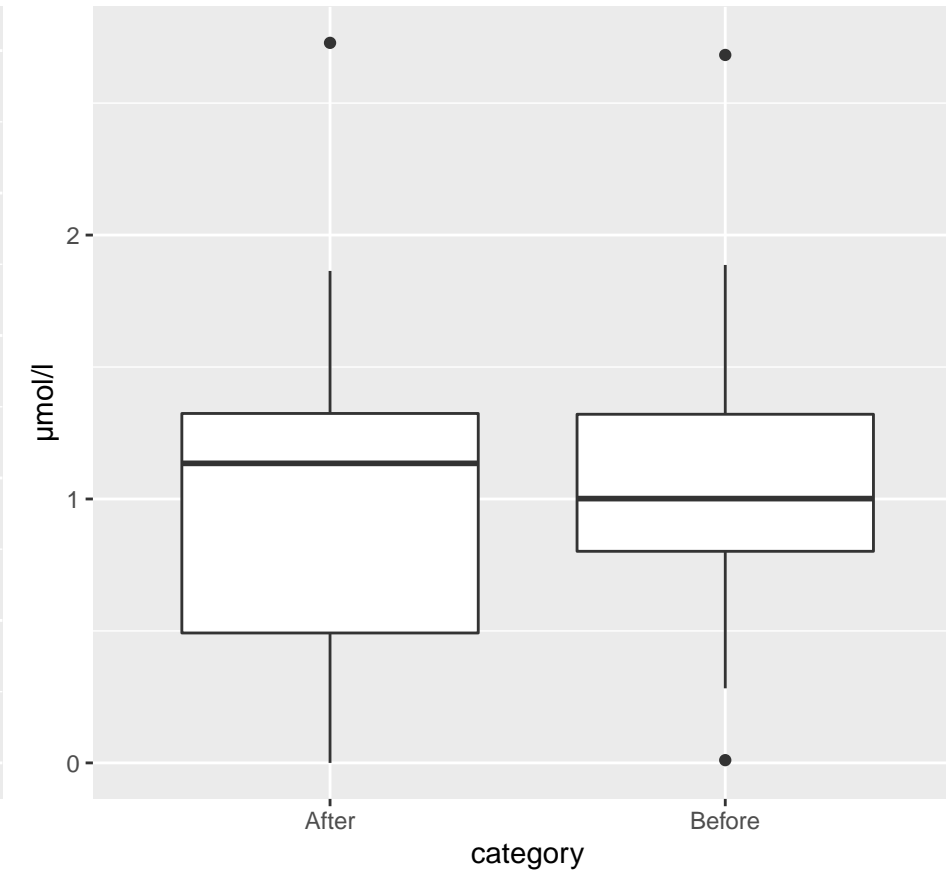

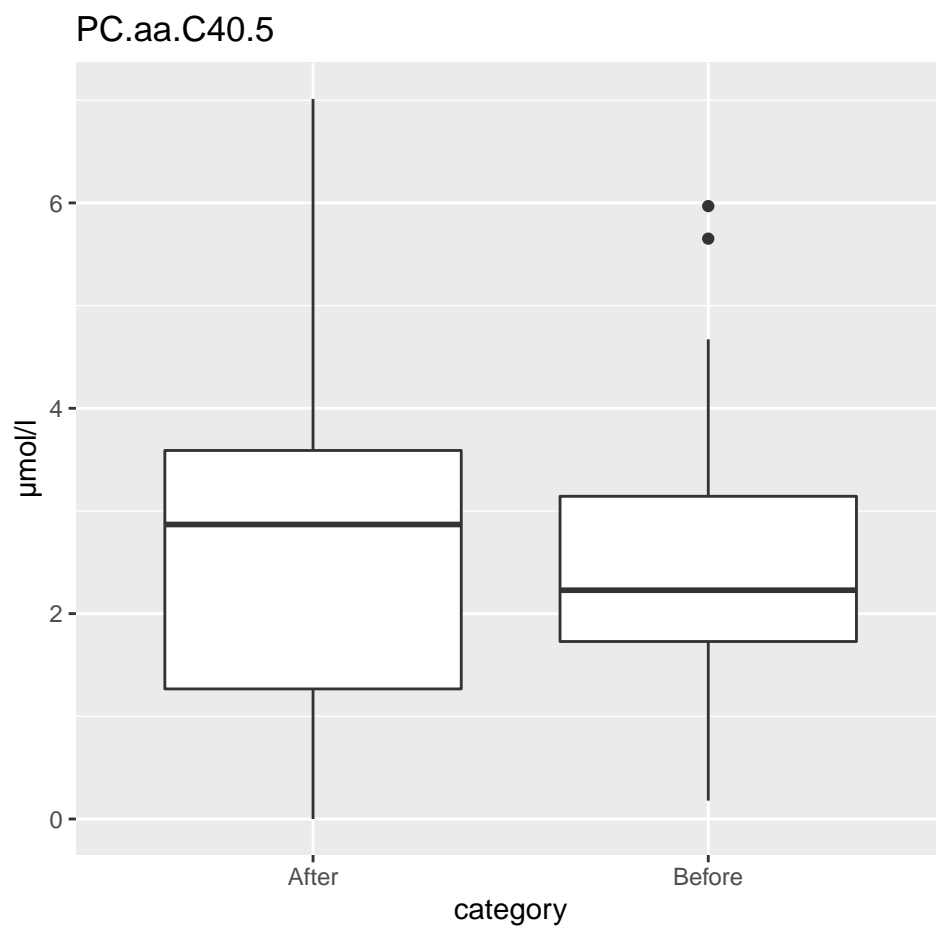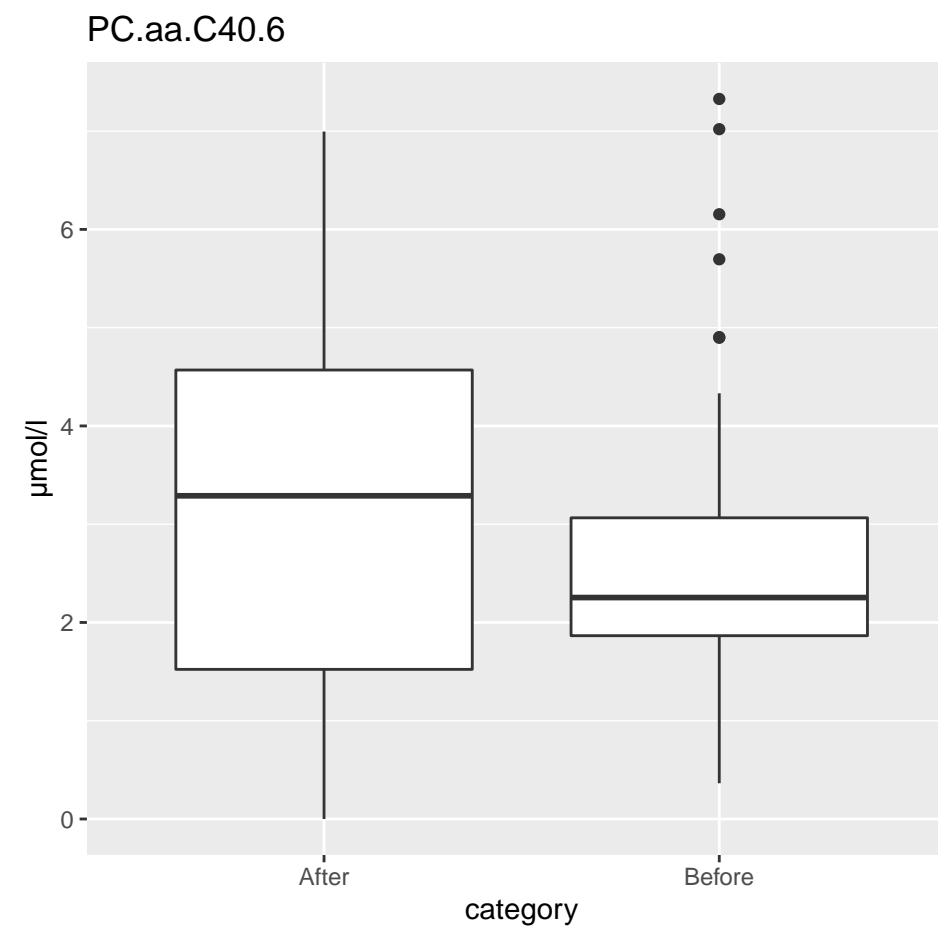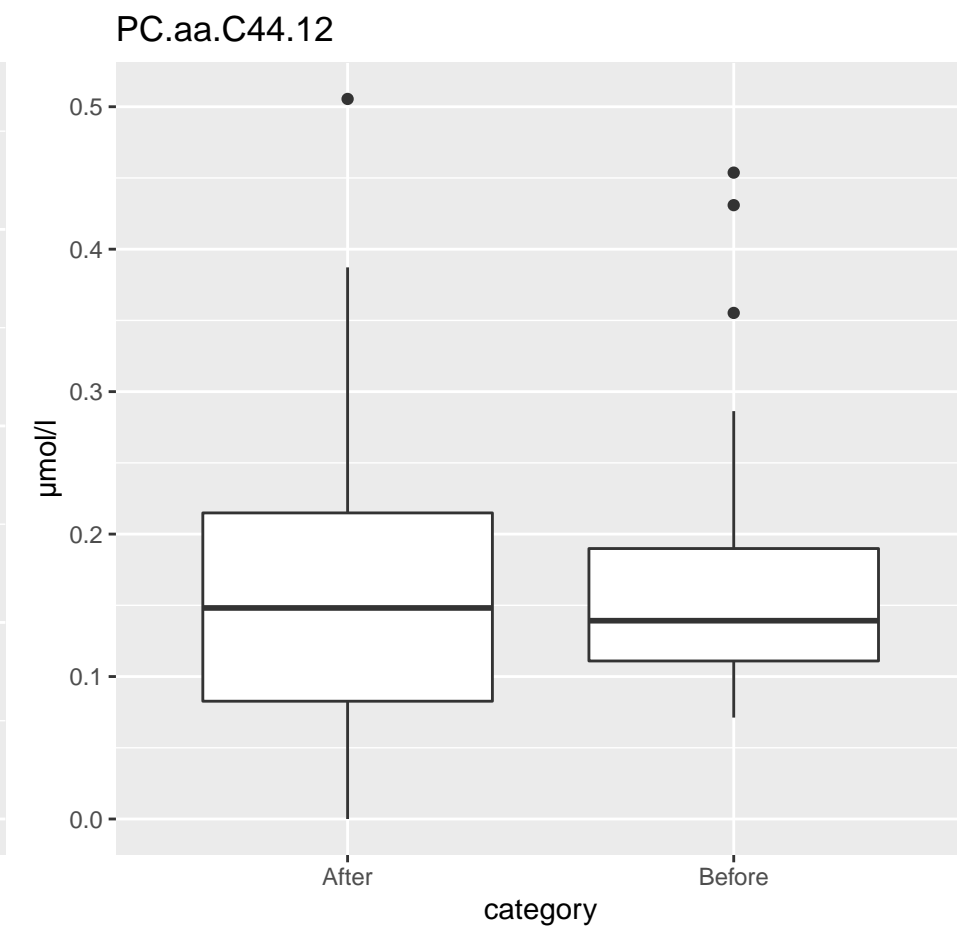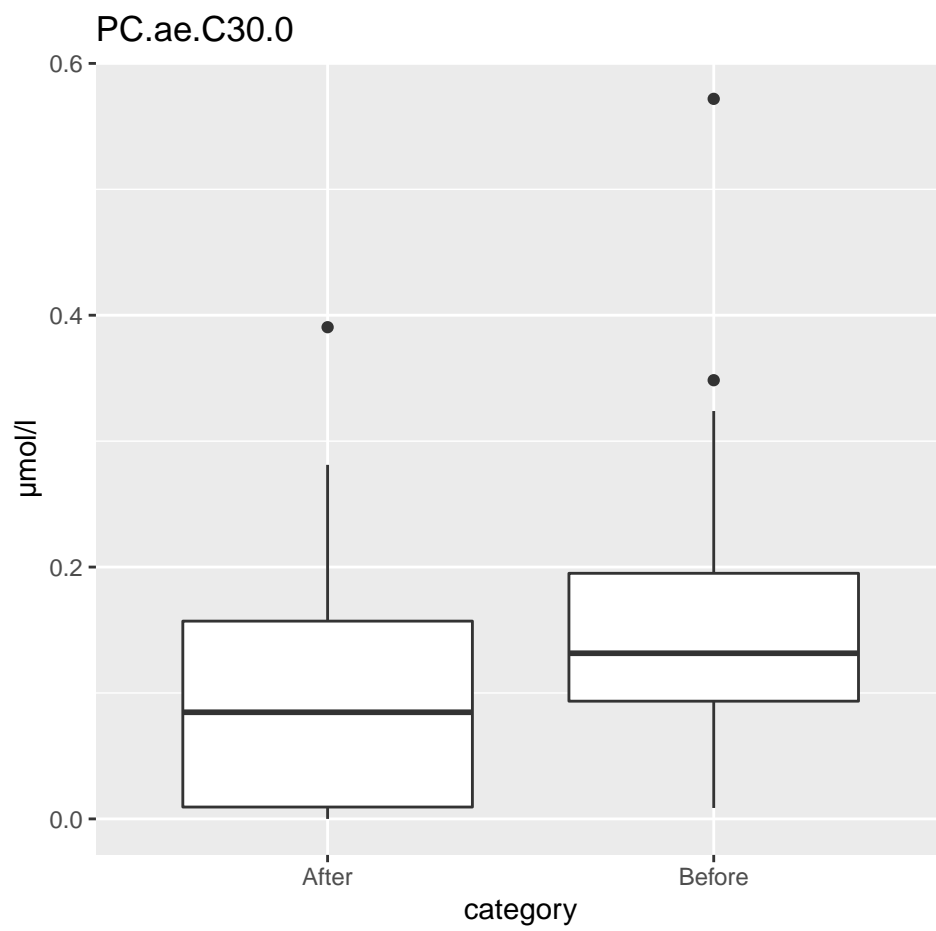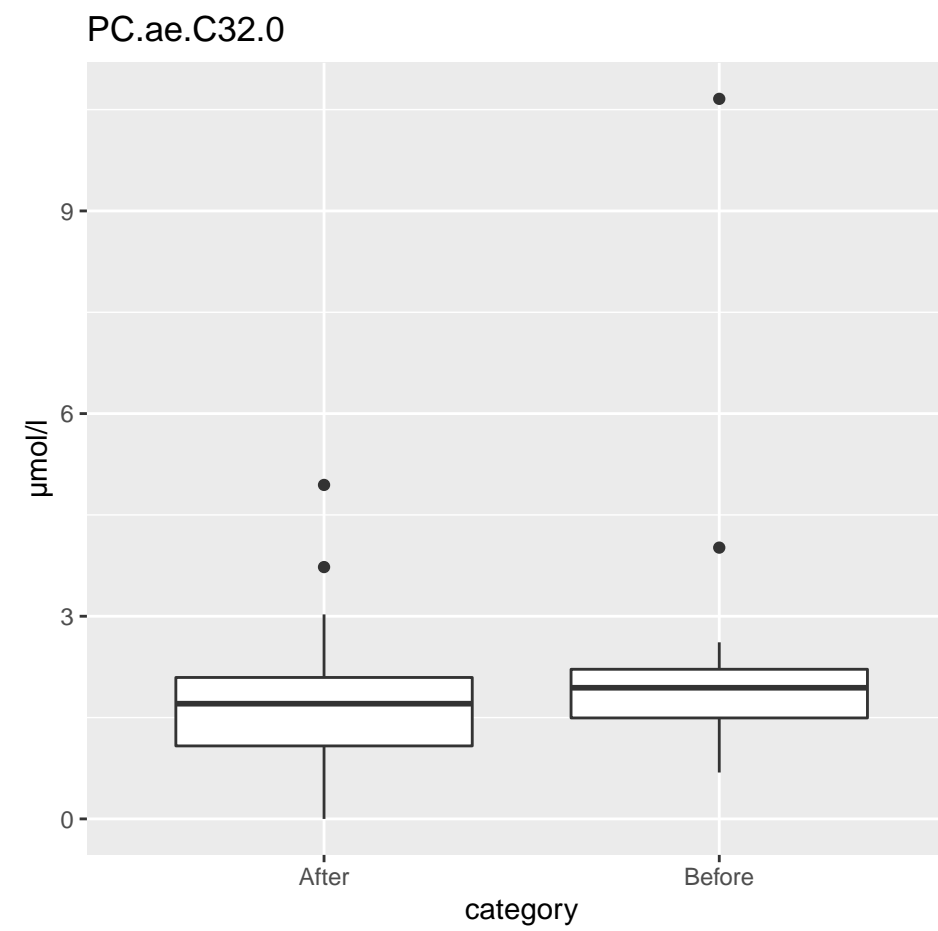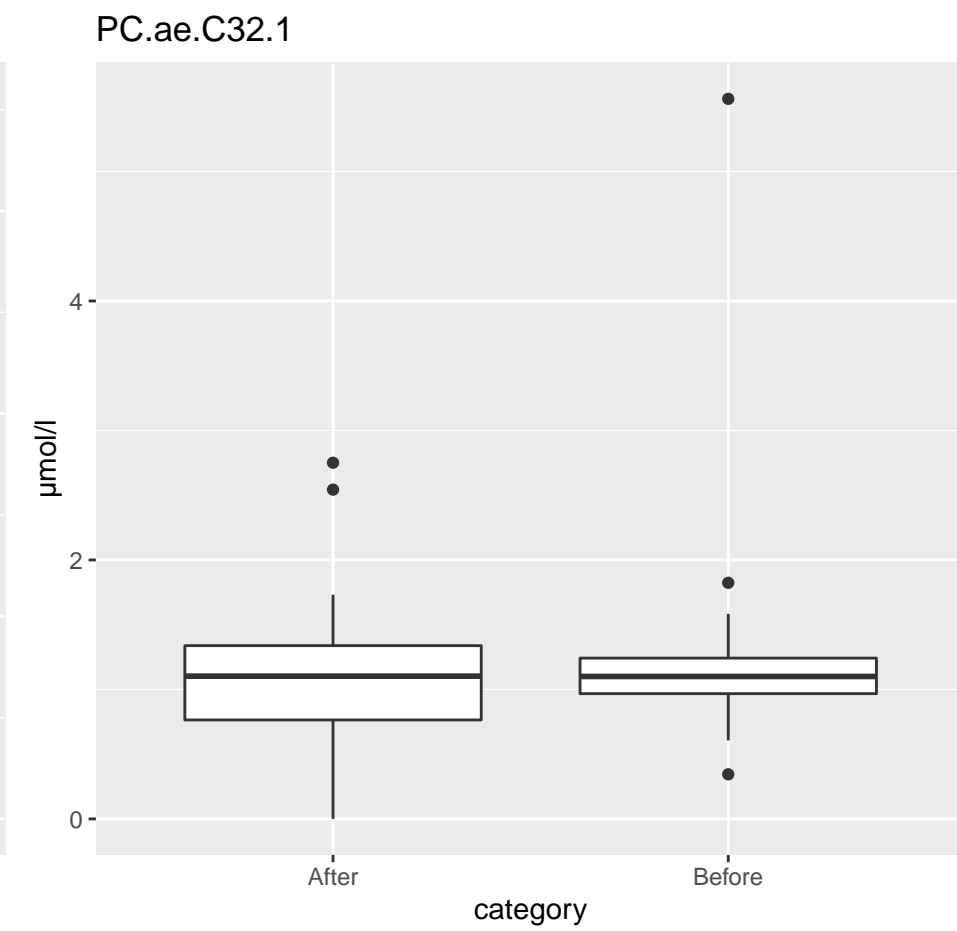

PC.ae.C32.2

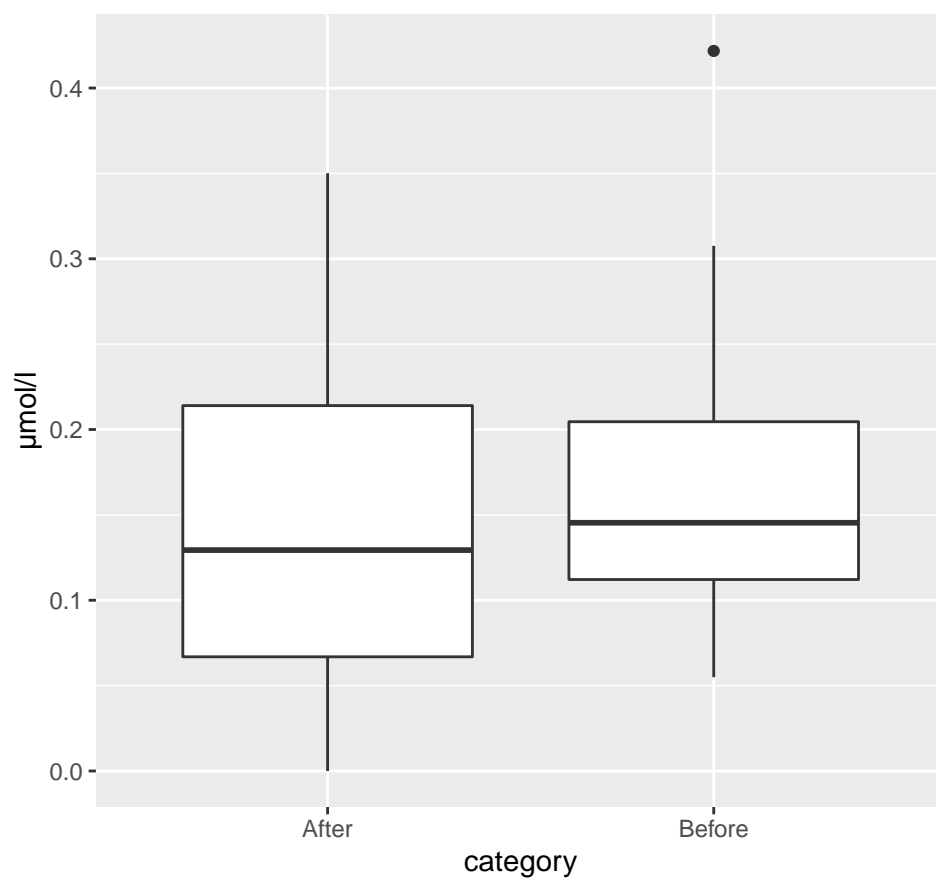

PC.ae.C34.0

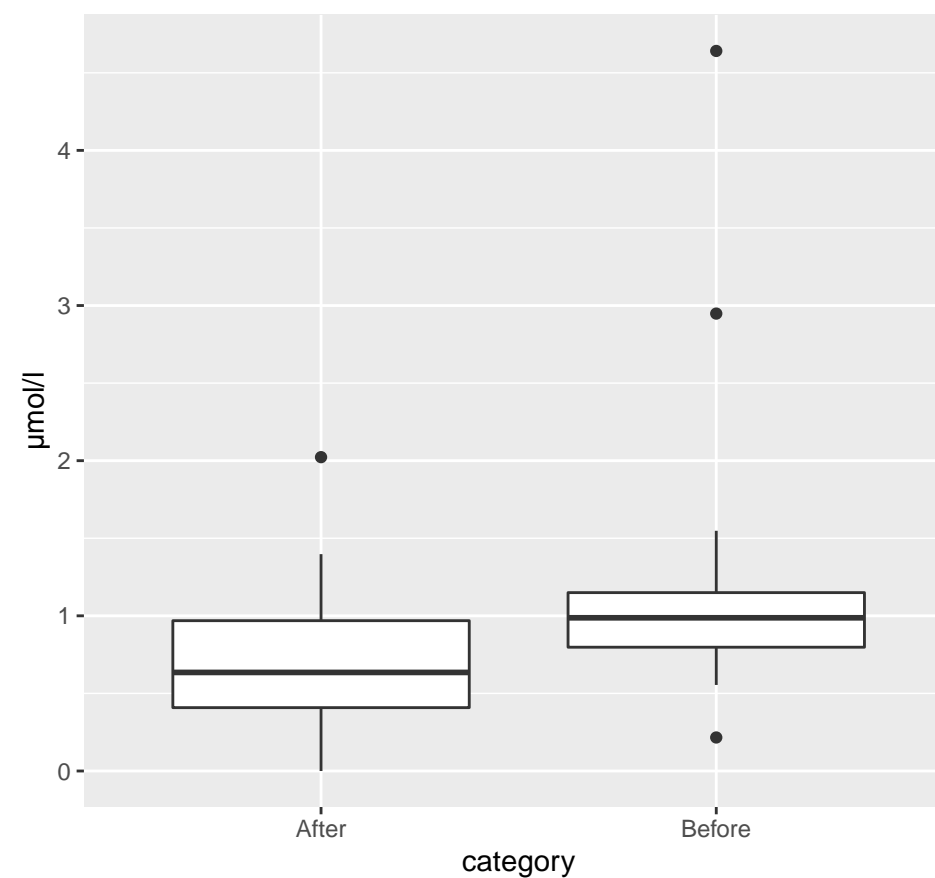

PC.ae.C34.1

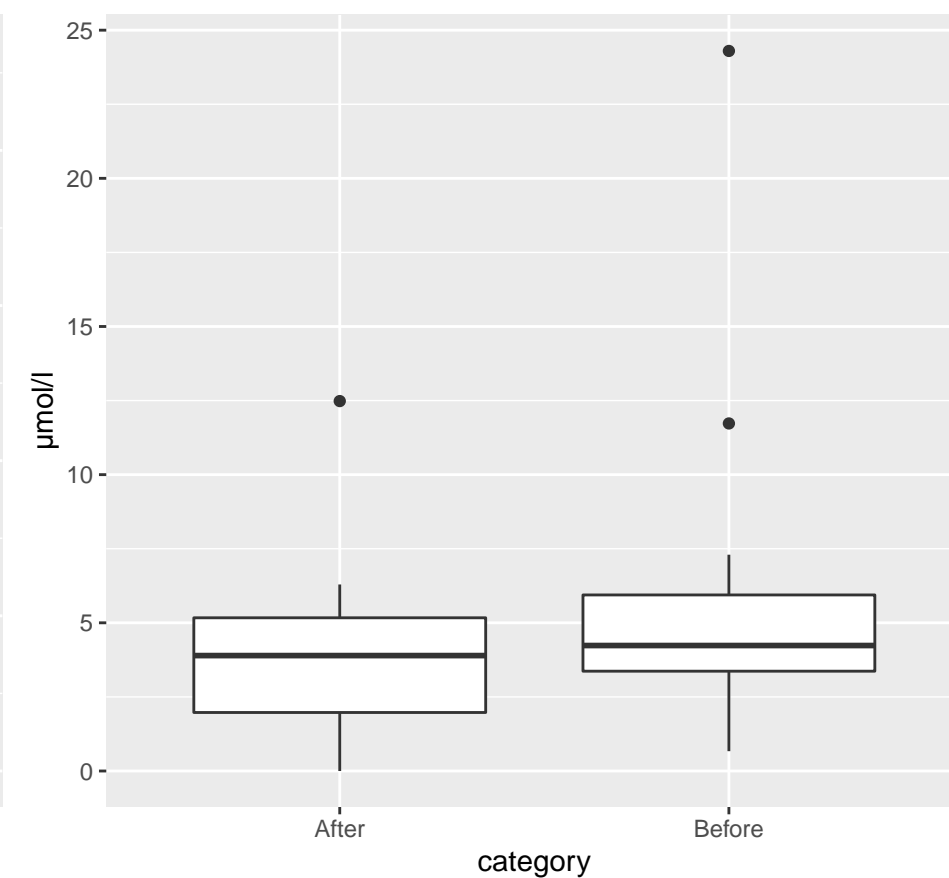

PC.ae.C34.2

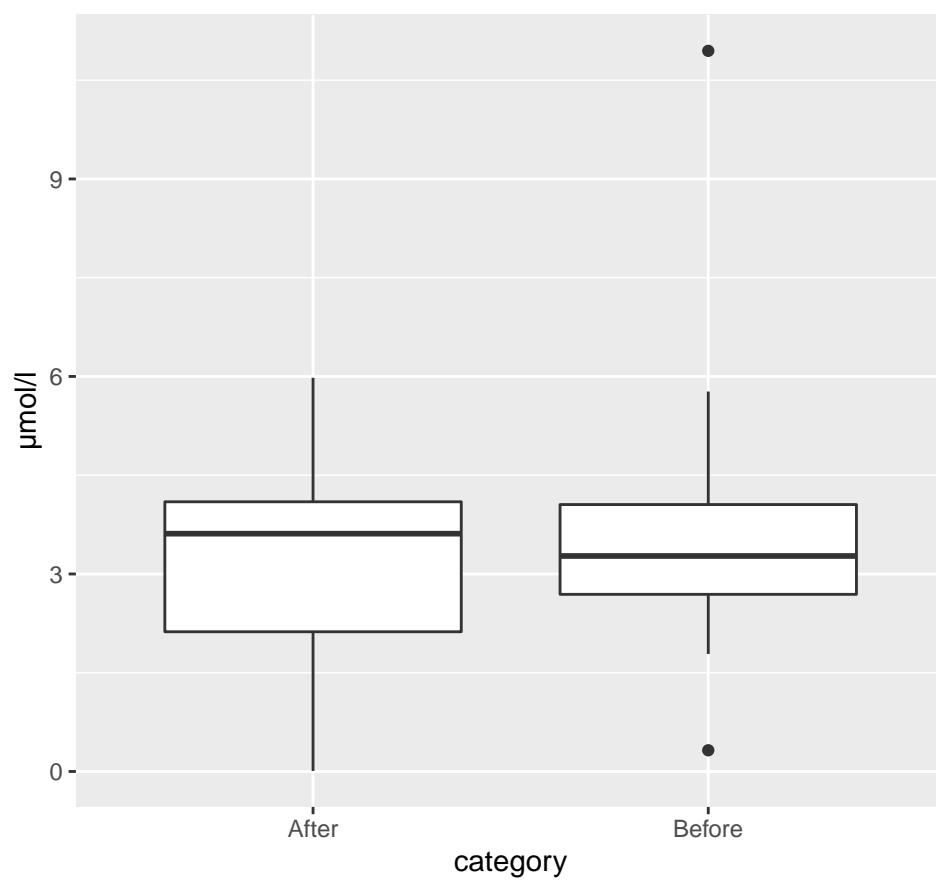

PC.ae.C34.3

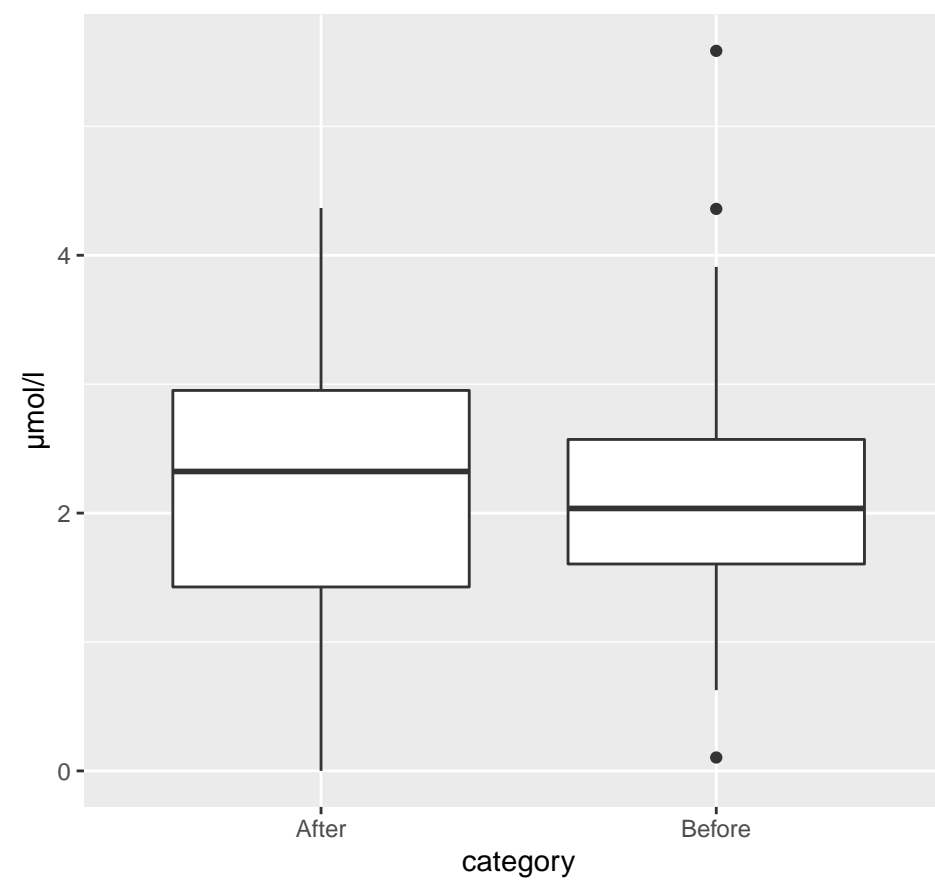

PC.ae.C34.4

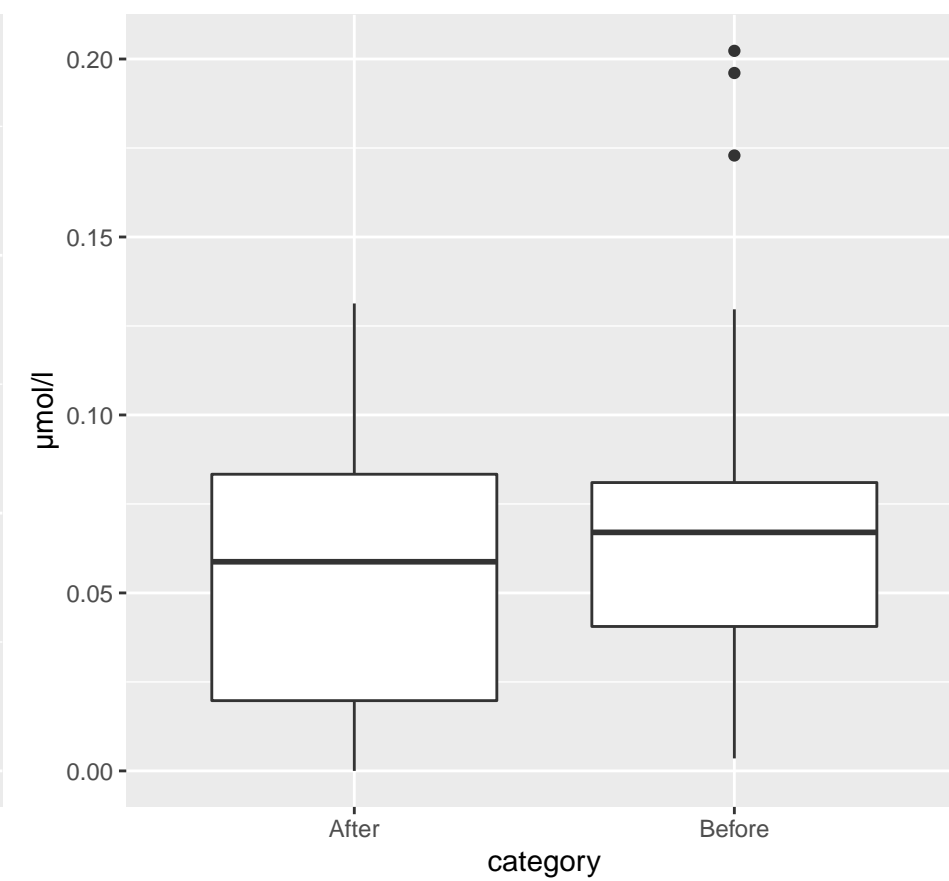

PC.ae.C36.0

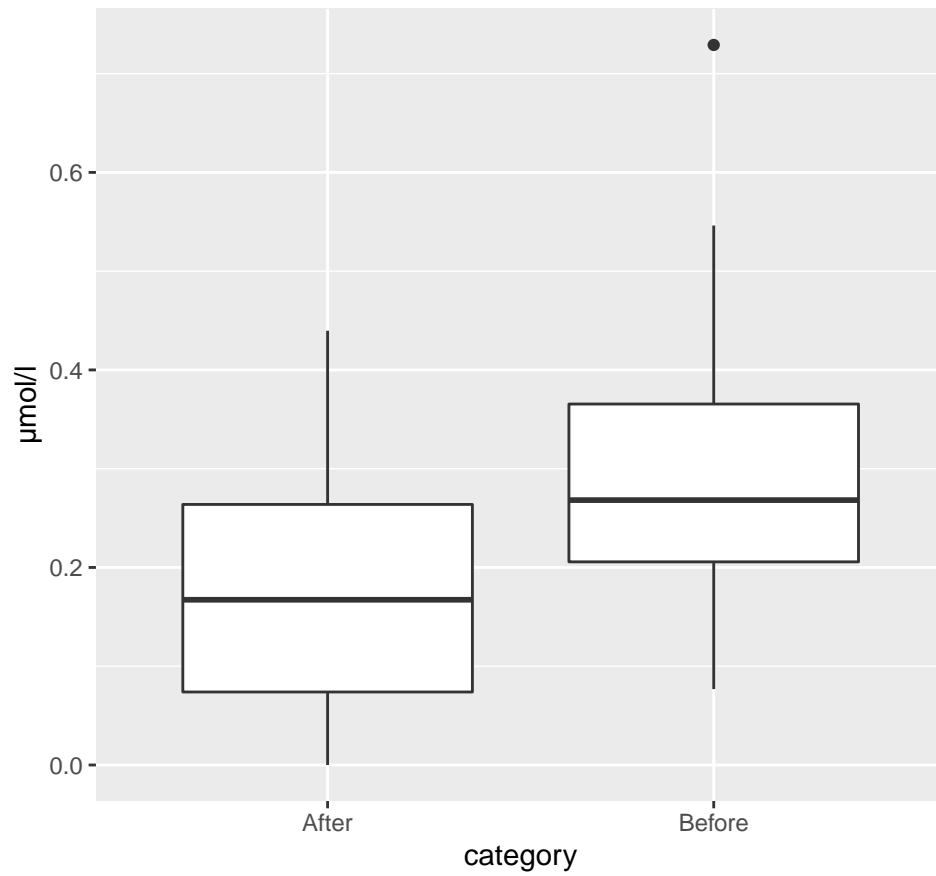

PC.ae.C36.1

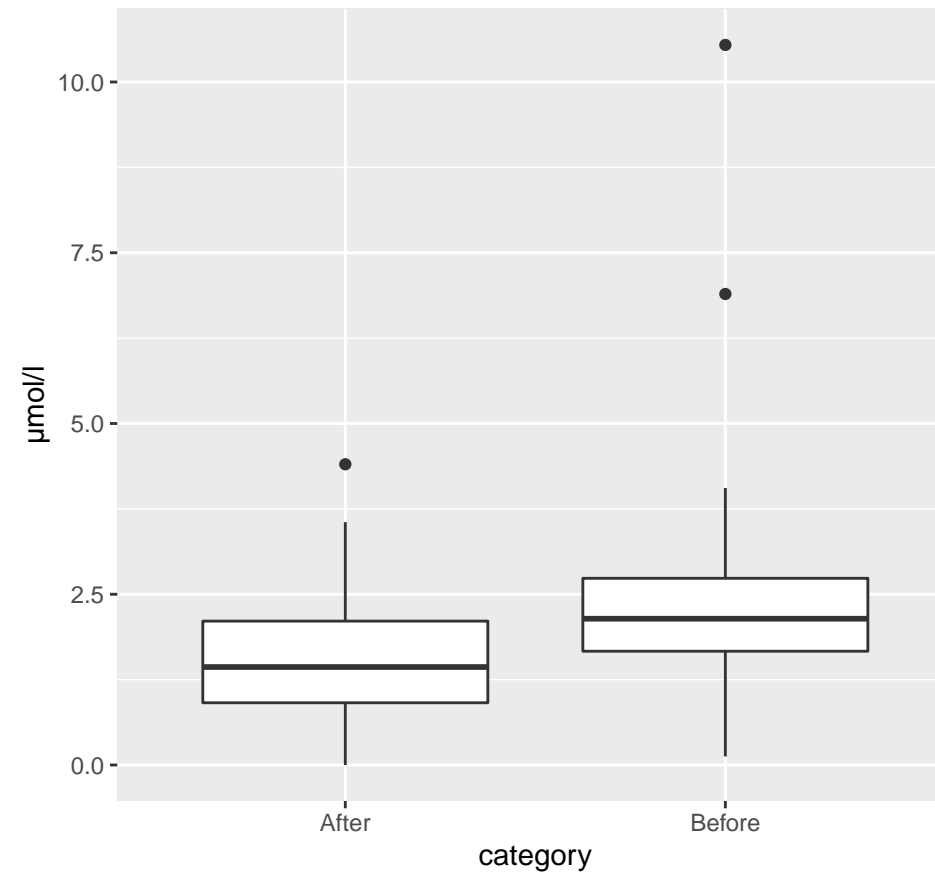

PC.ae.C36.2

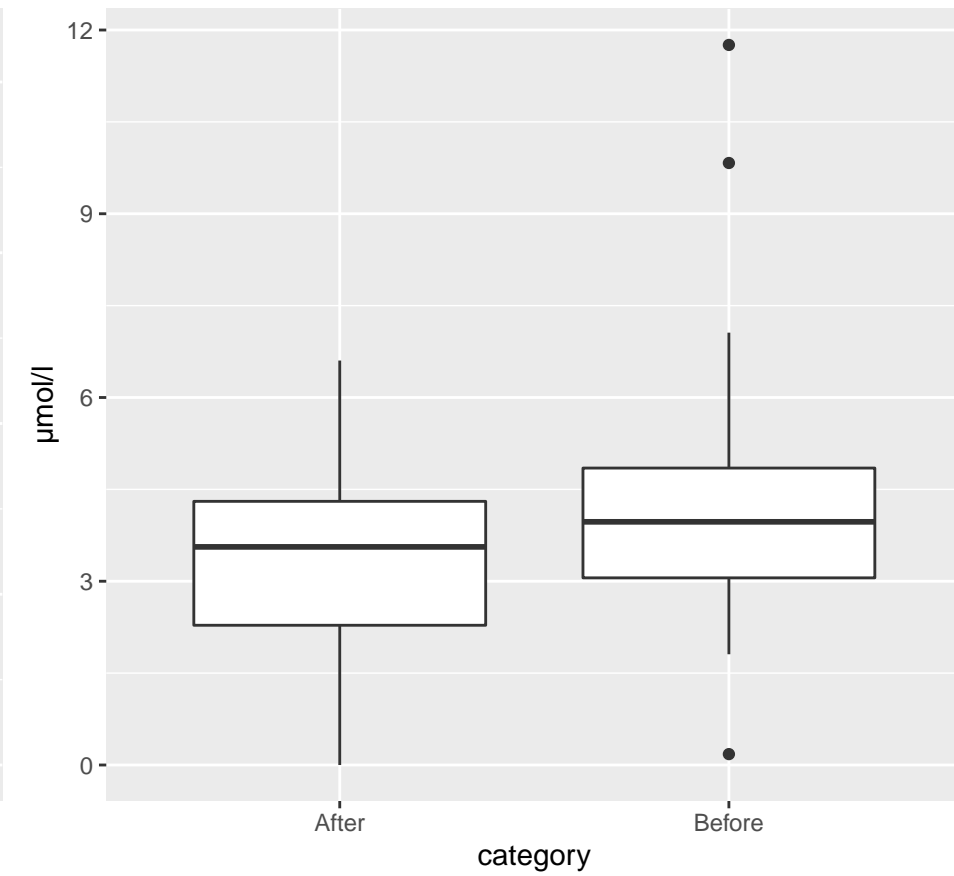

PC.ae.C36.3

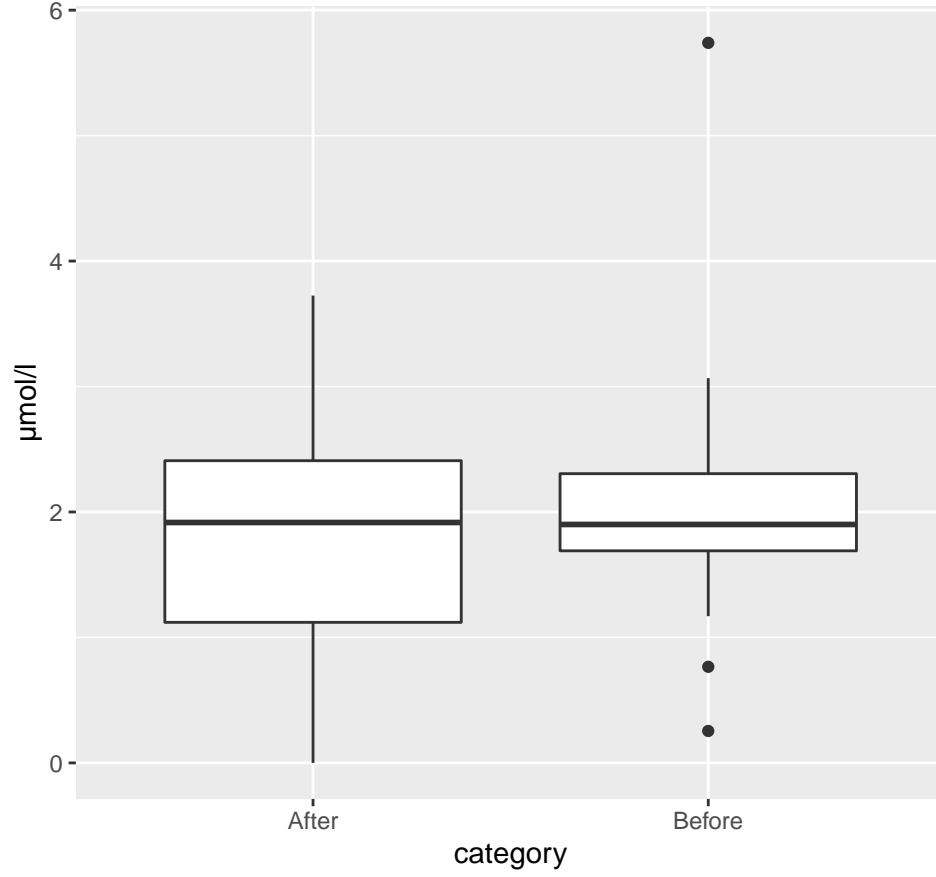

PC.ae.C36.4

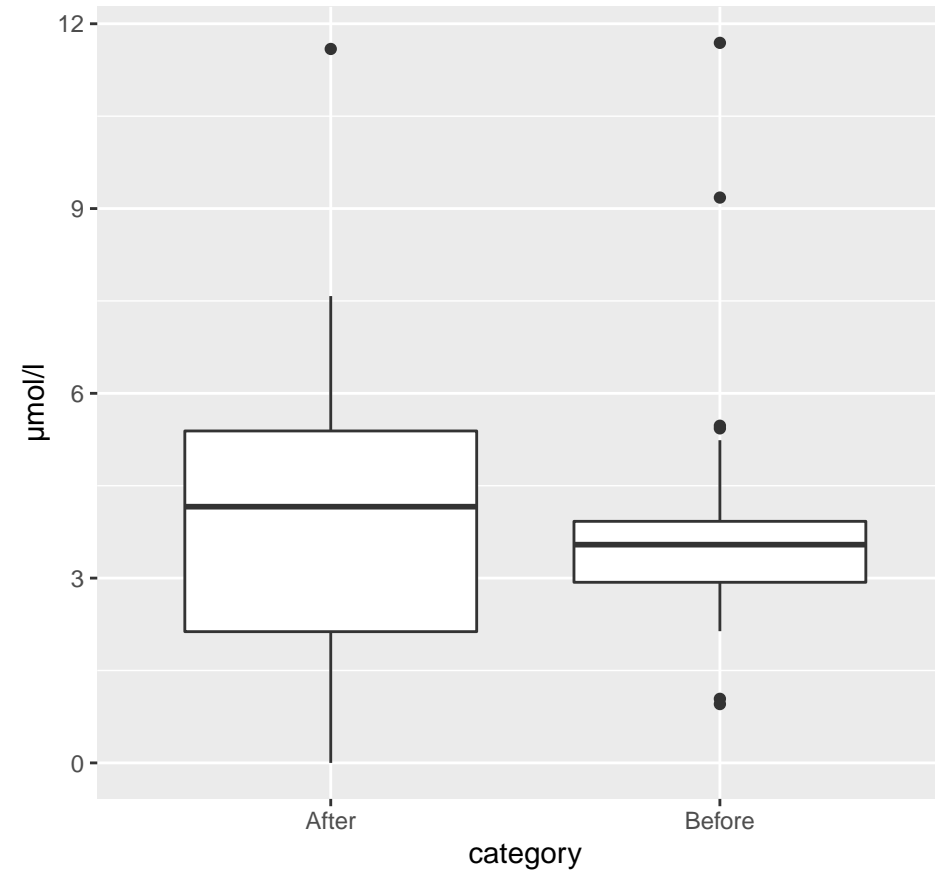

PC.ae.C36.5

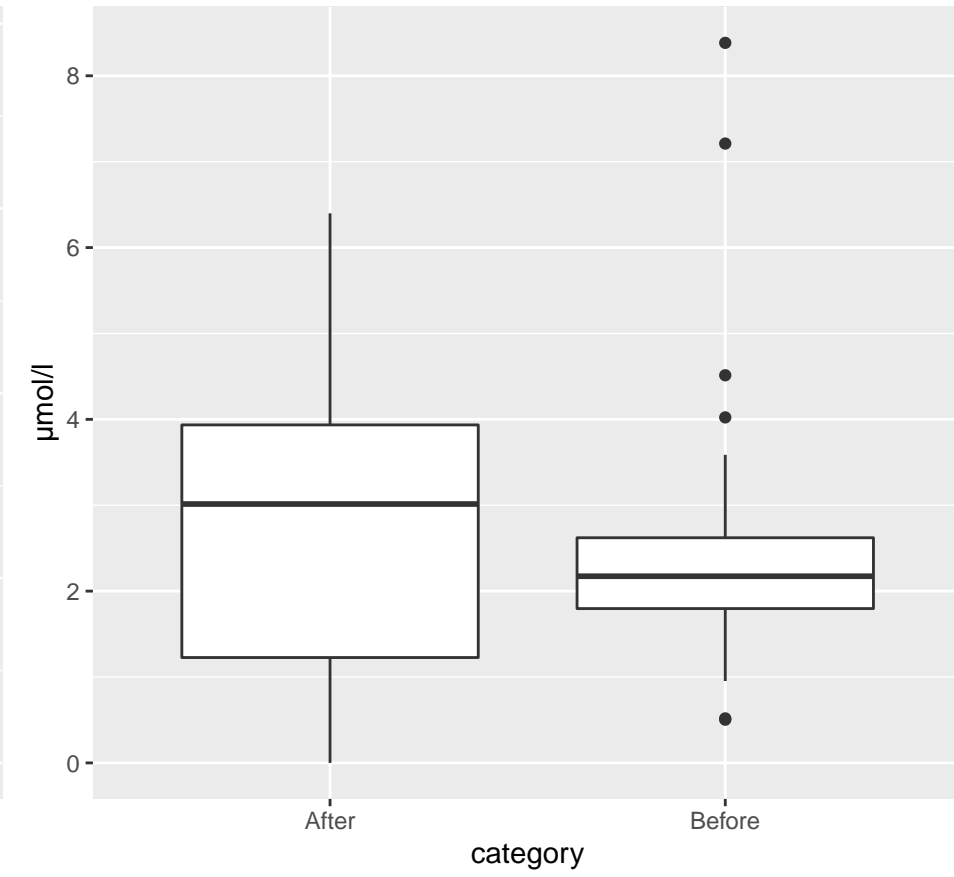

PC.ae.C36.6

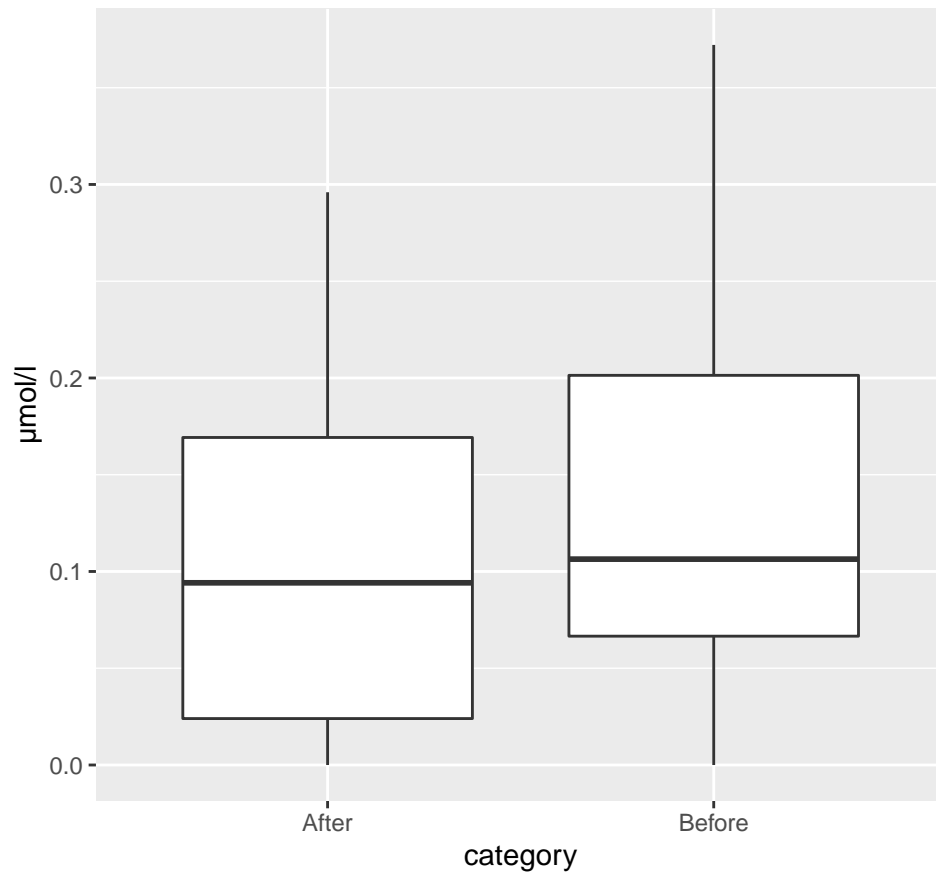

PC.ae.C38.0

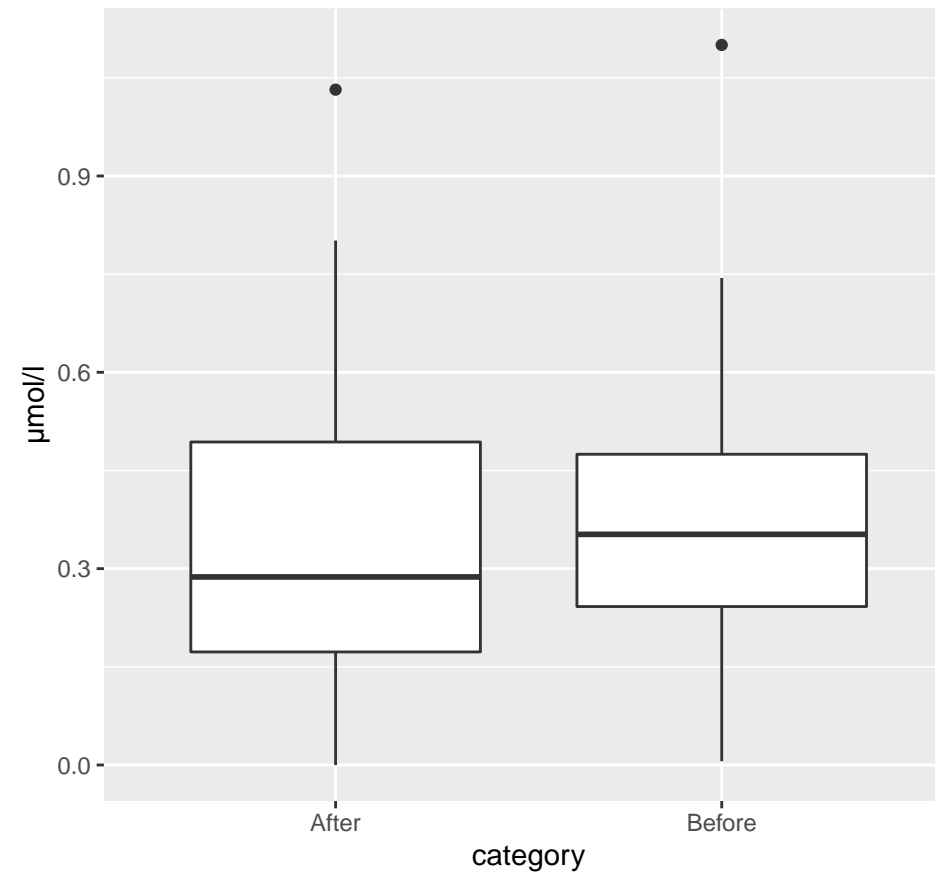

PC.ae.C38.3

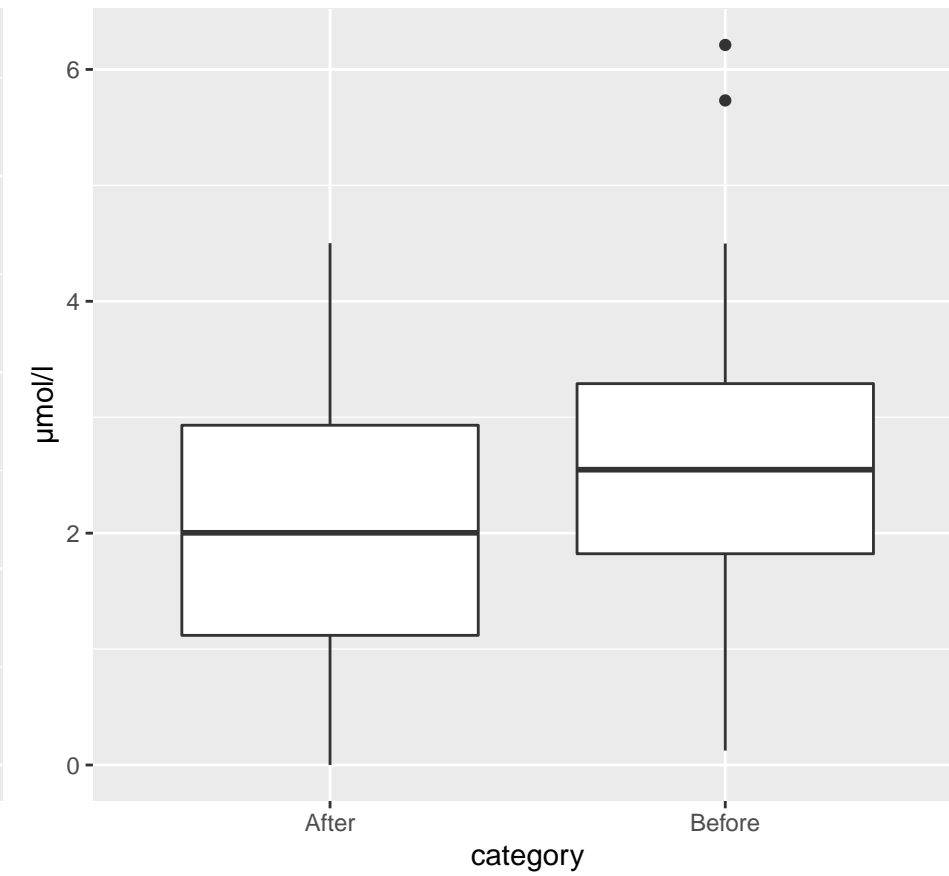

PC.ae.C38.4

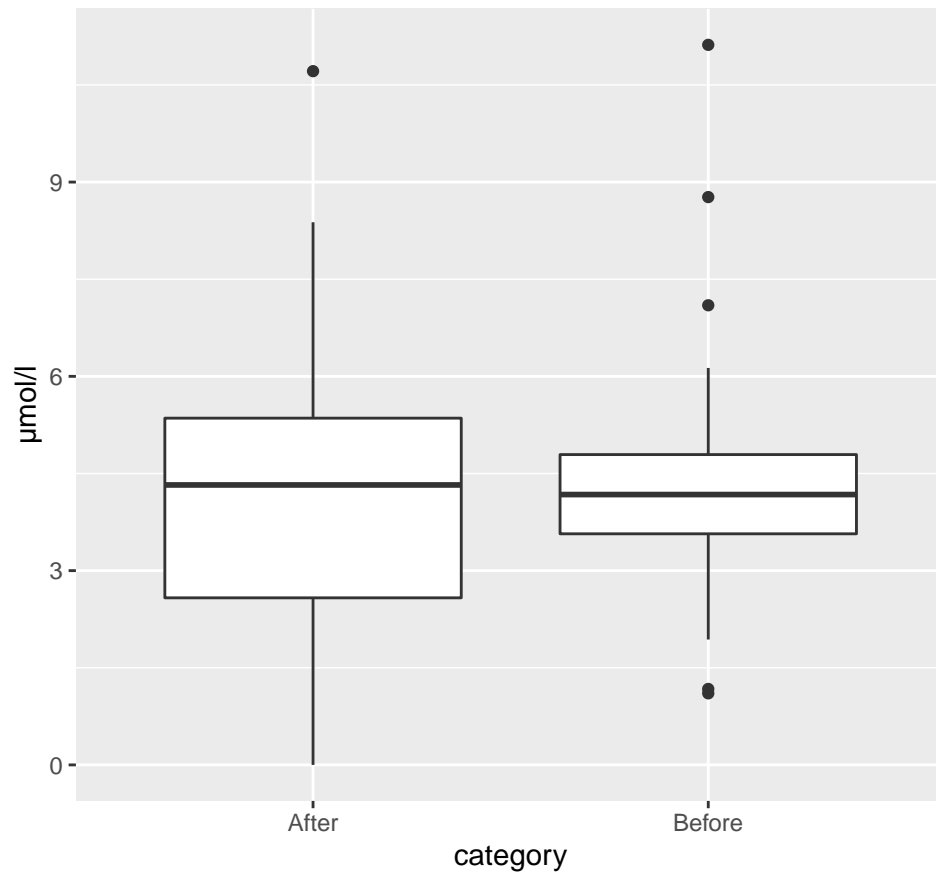

PC.ae.C38.5

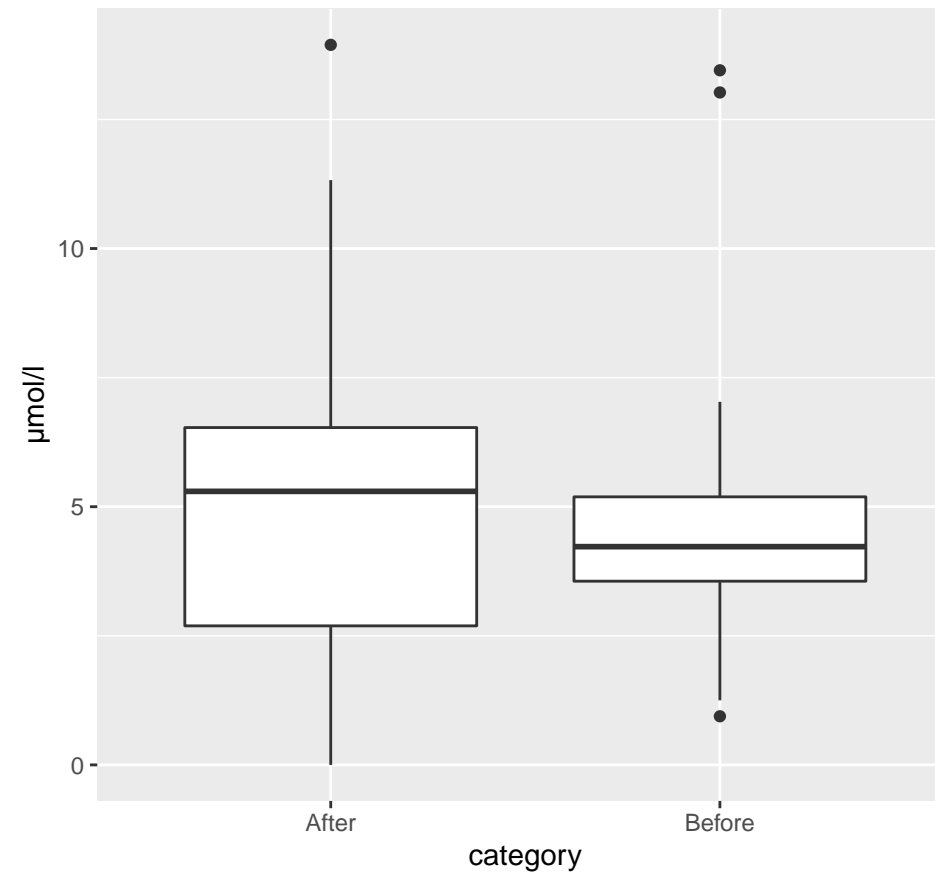

PC.ae.C38.6

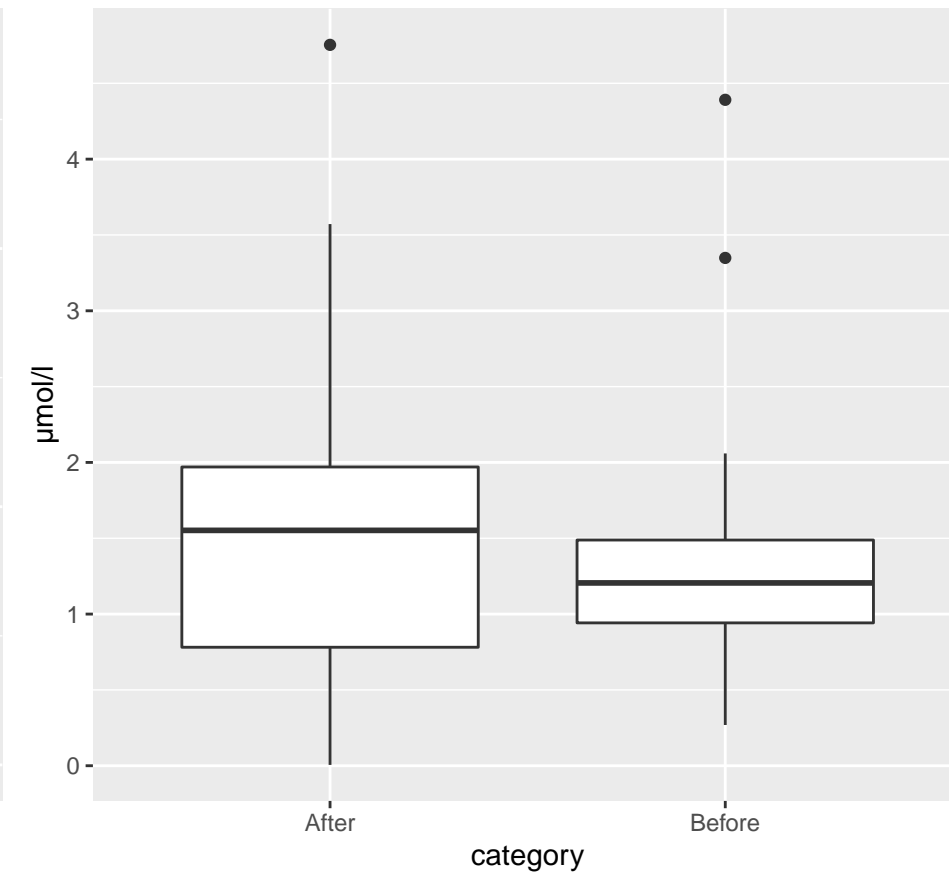

PC.ae.C40.0

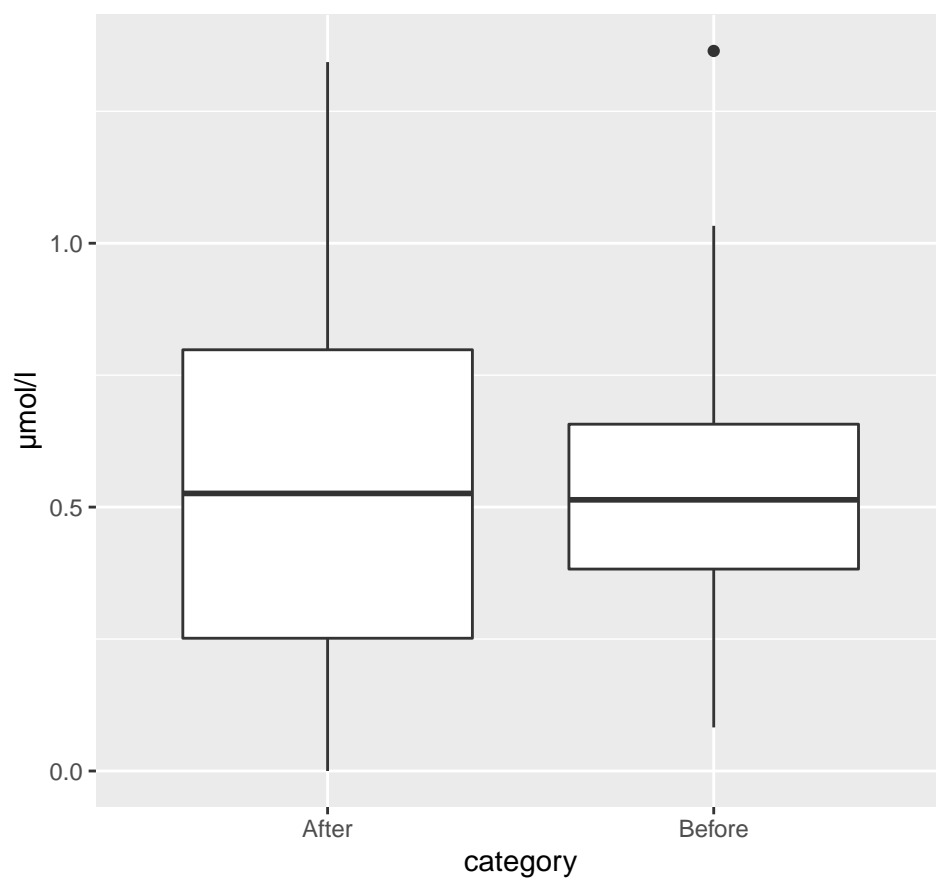

PC.ae.C40.1

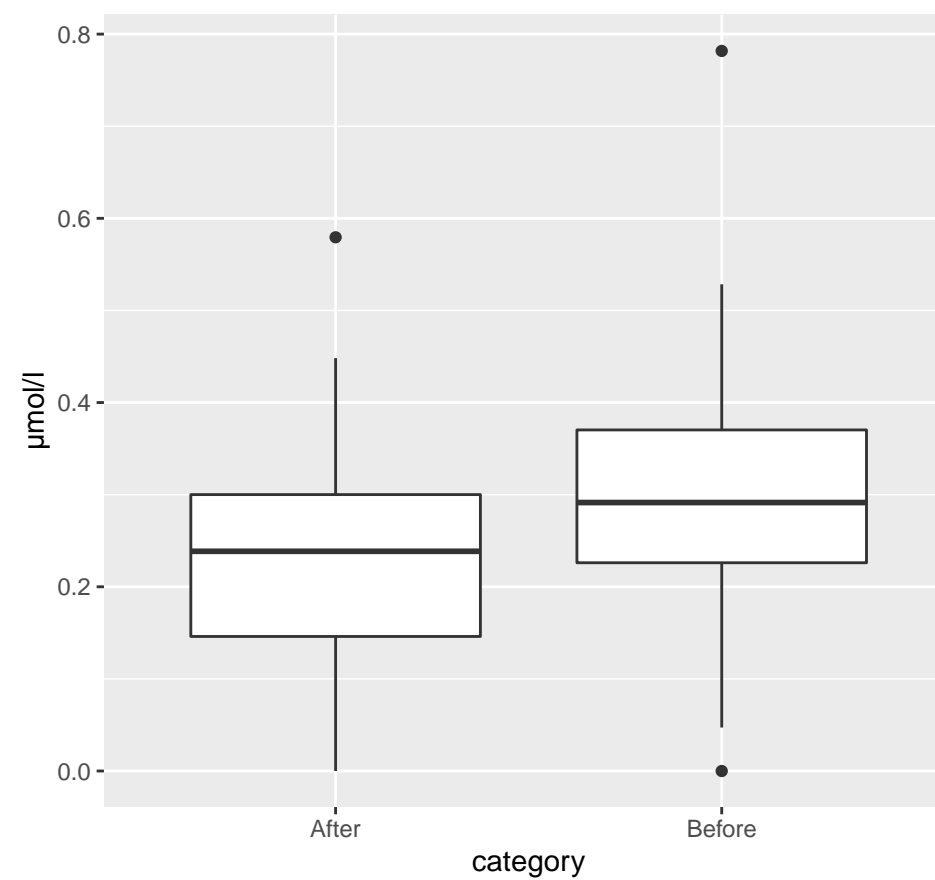

PC.ae.C40.2

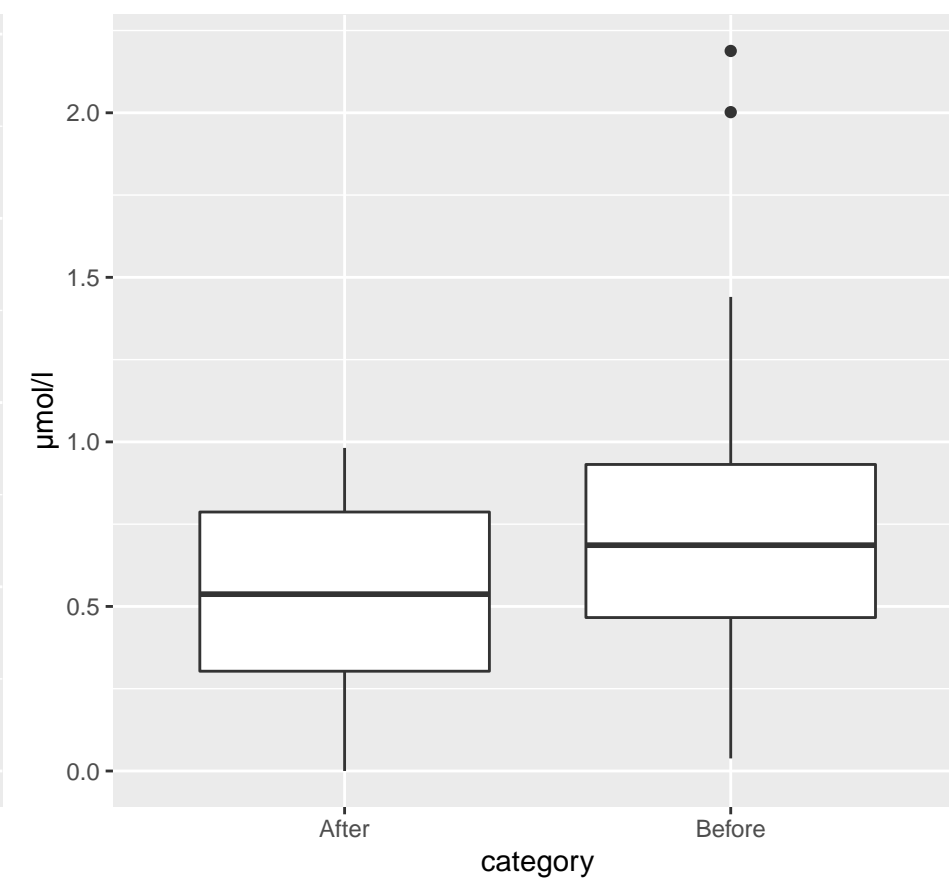

PC.ae.C40.4

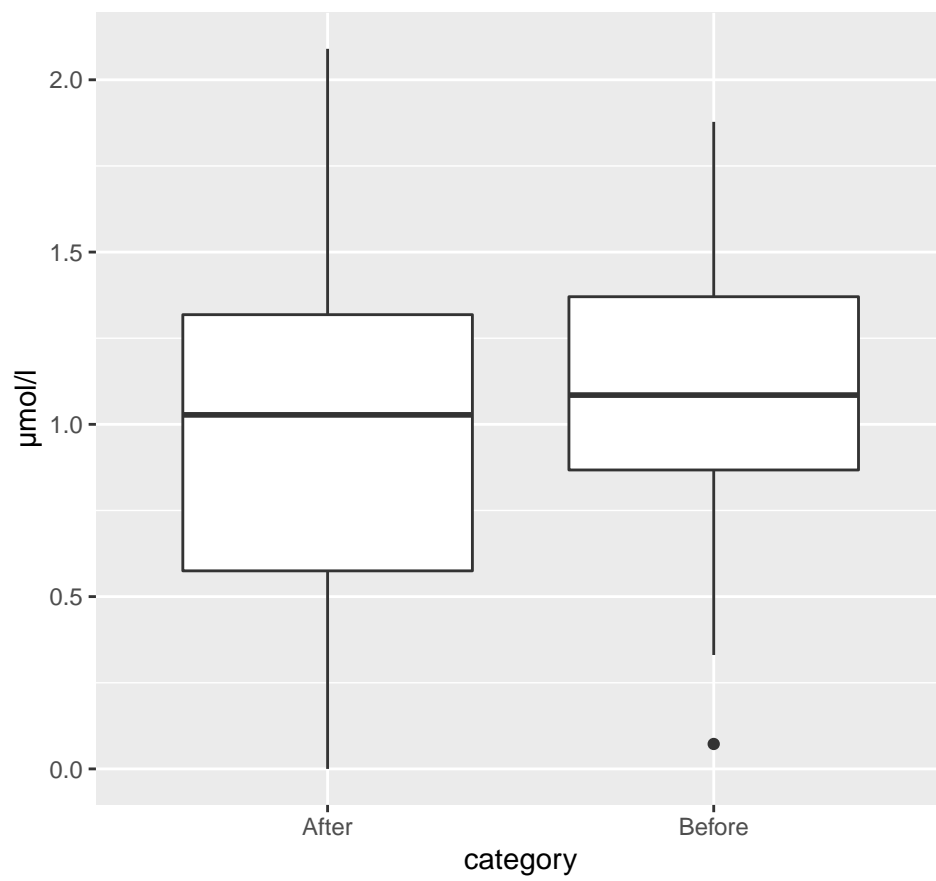

PC.ae.C40.5

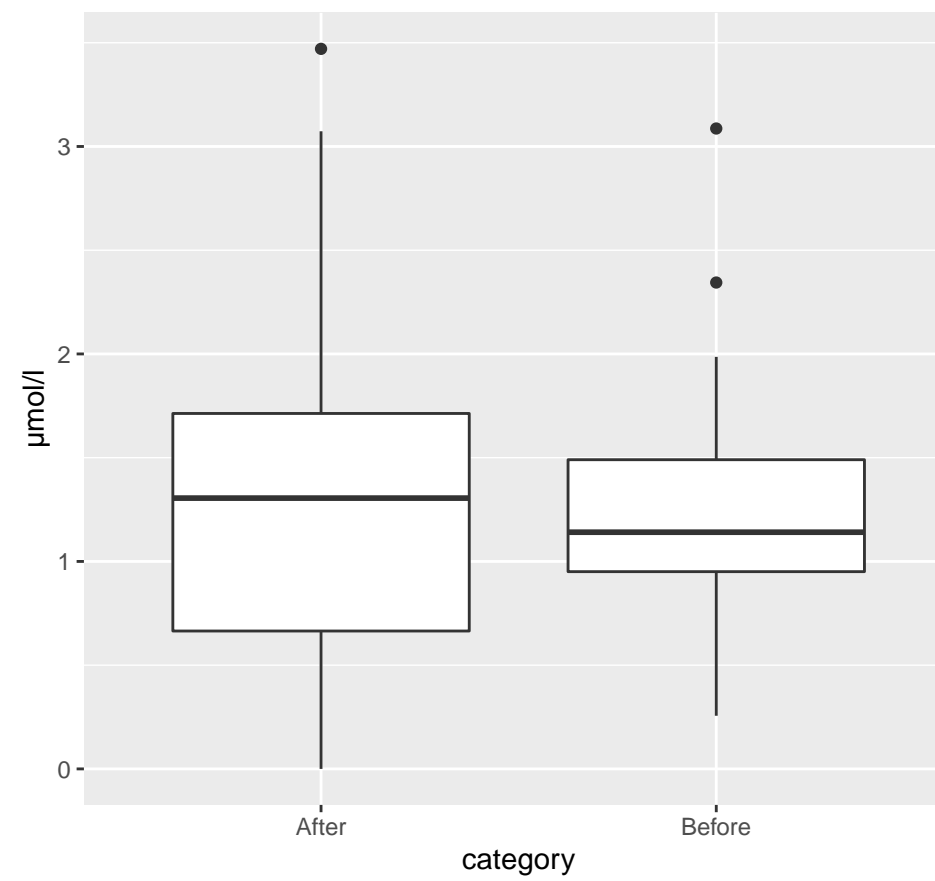

PC.ae.C40.6

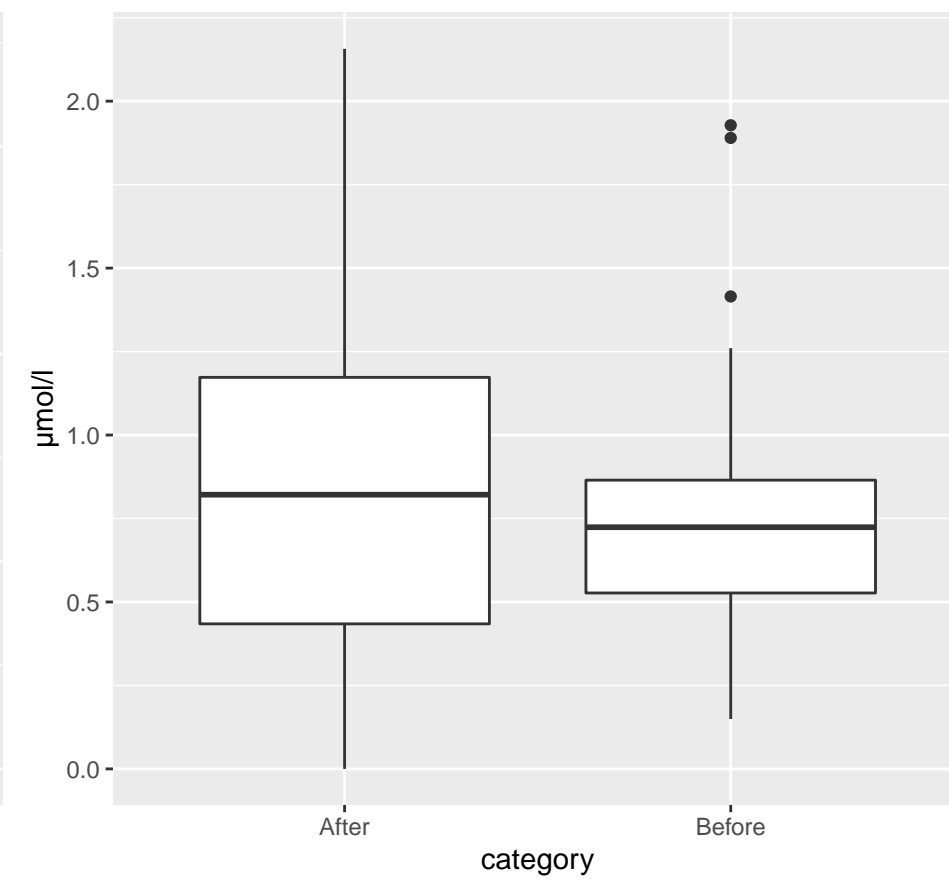

PC.ae.C42.6

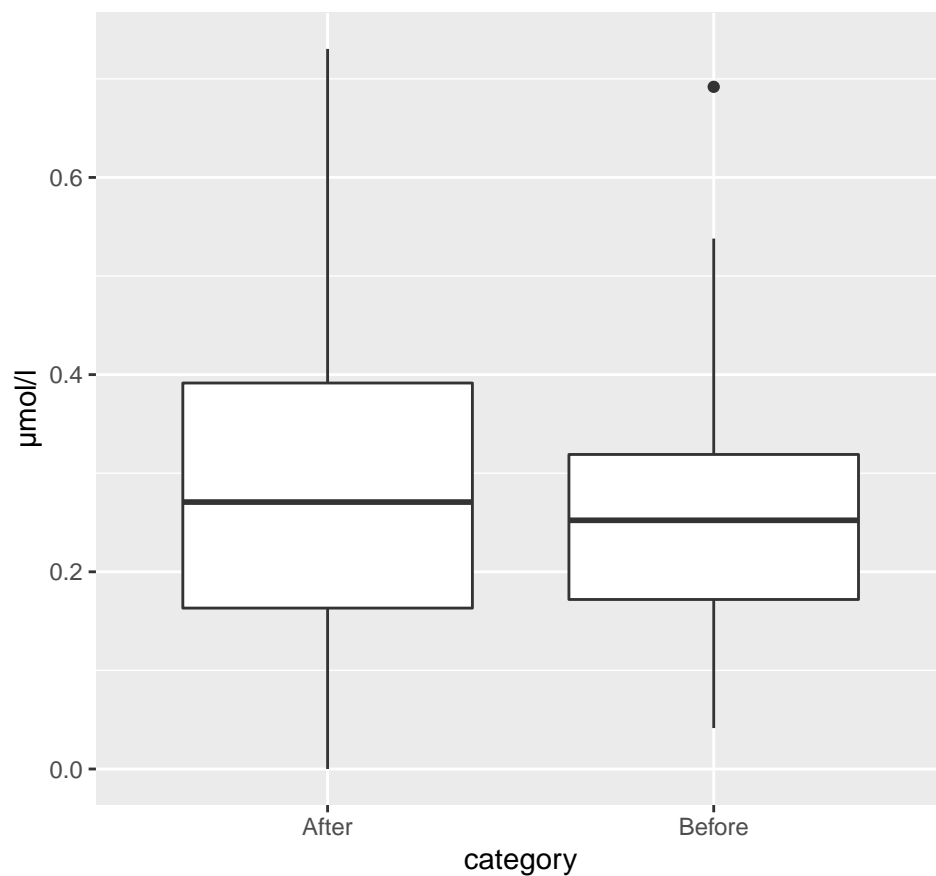

SM.a.C30.1

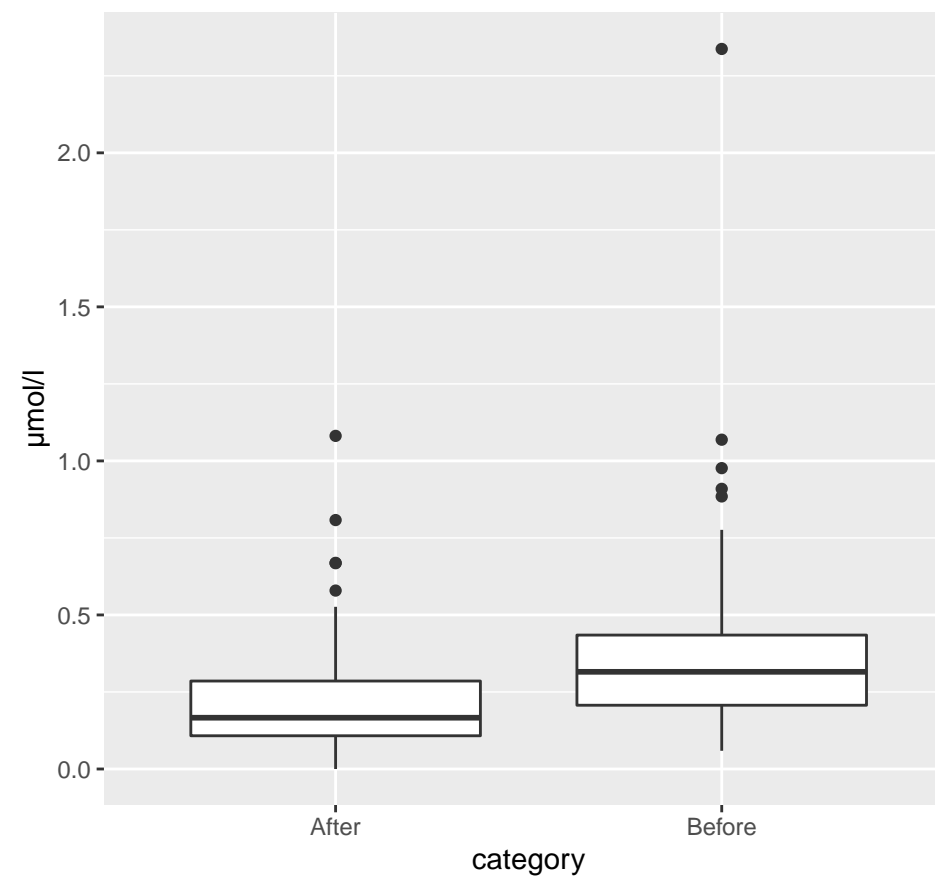

SM.a.C31.1

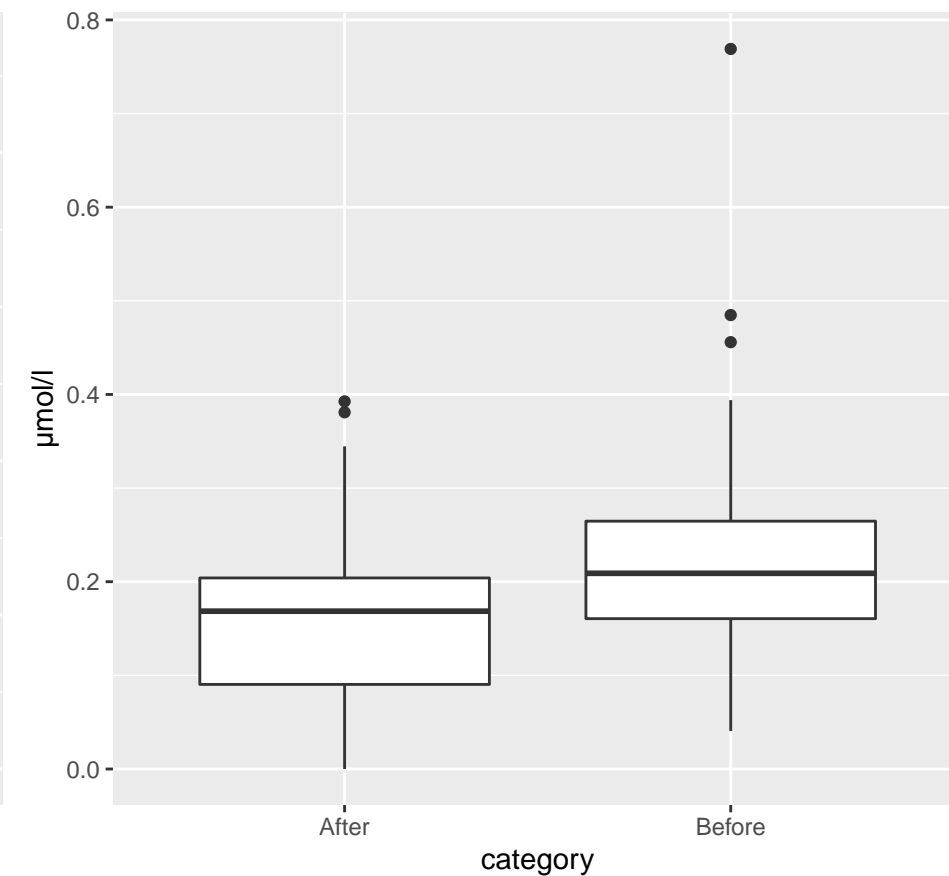

SM.a.C32.1

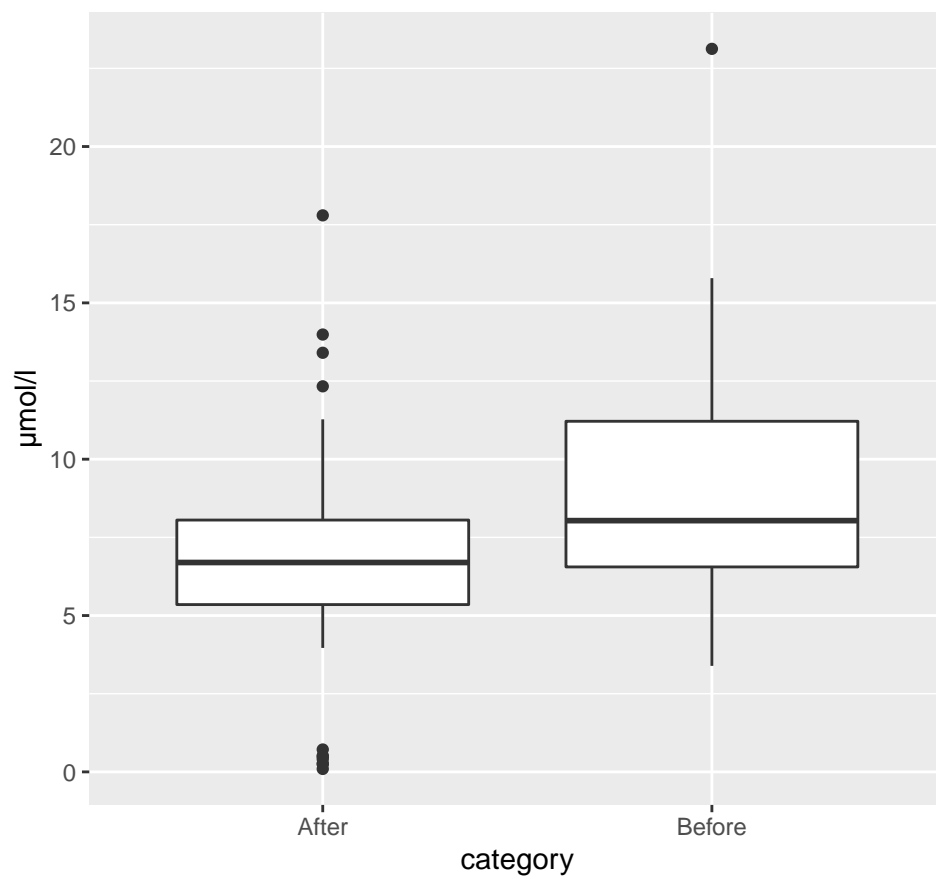

SM.a.C32.2

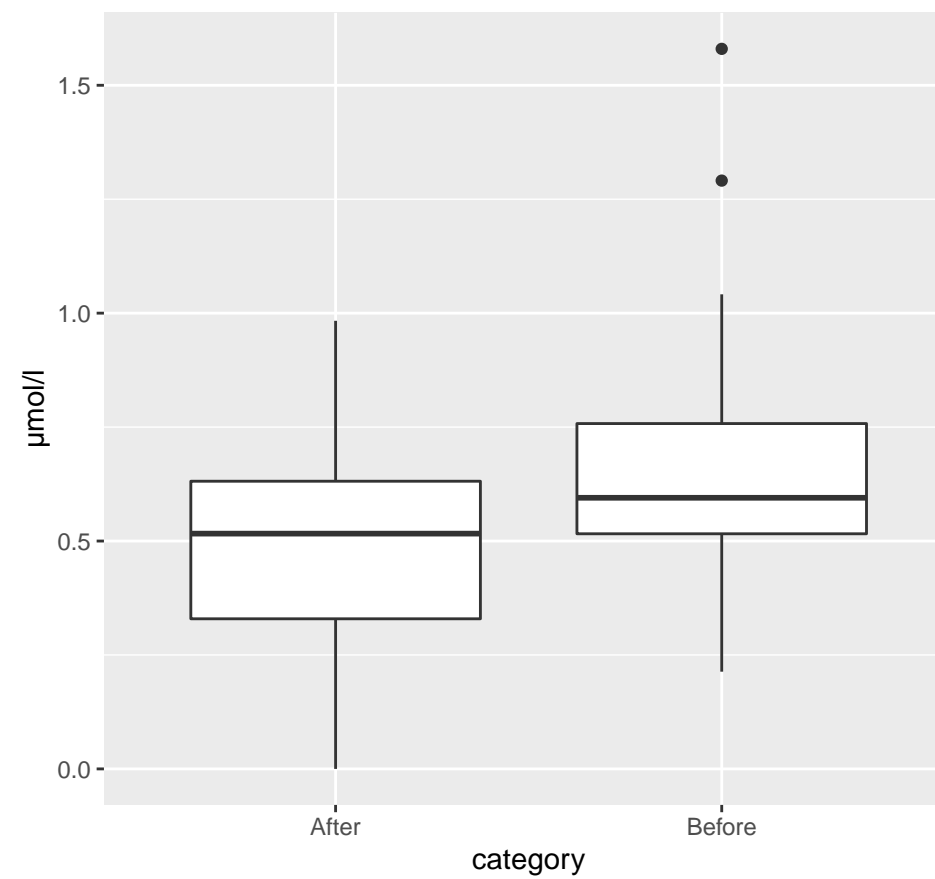

SM.a.C33.1

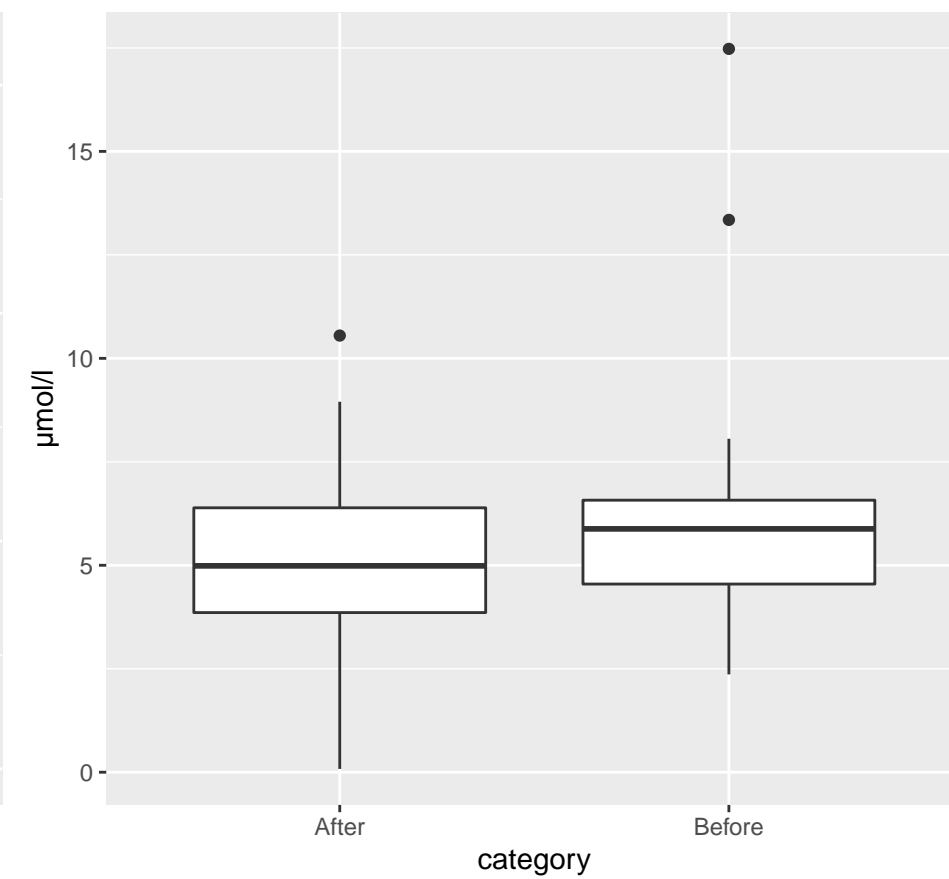

SM.a.C33.2

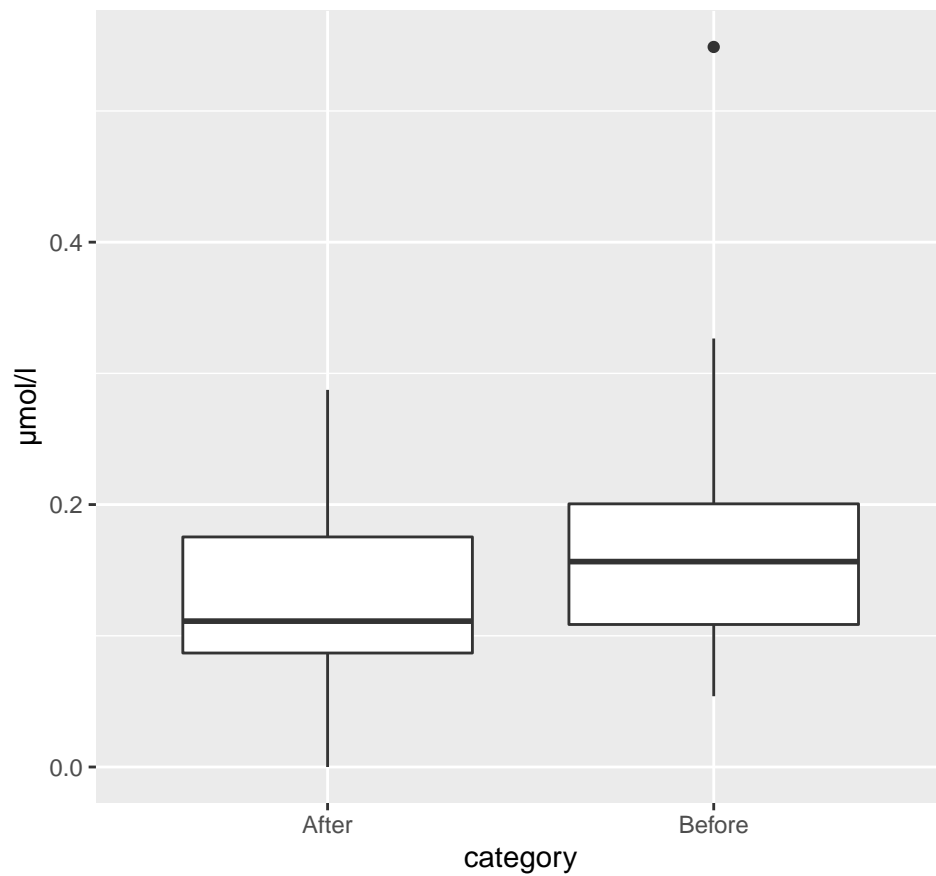

SM.a.C33.3

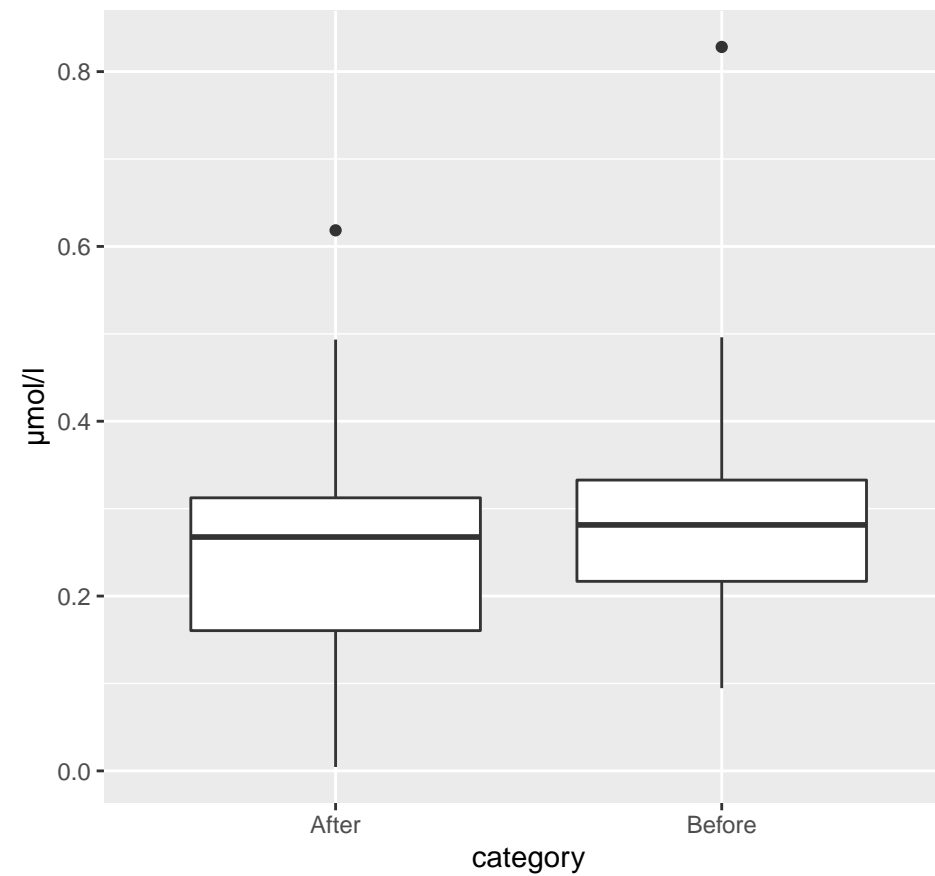

SM.a.C34.1

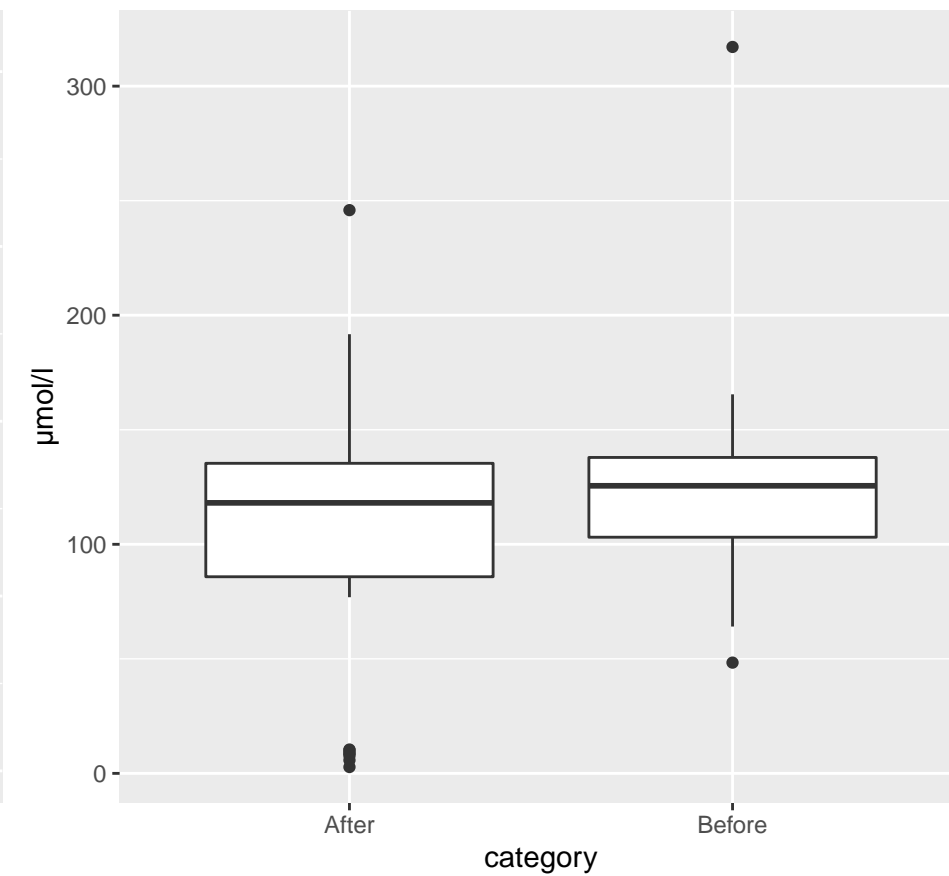

SM.a.C34.2

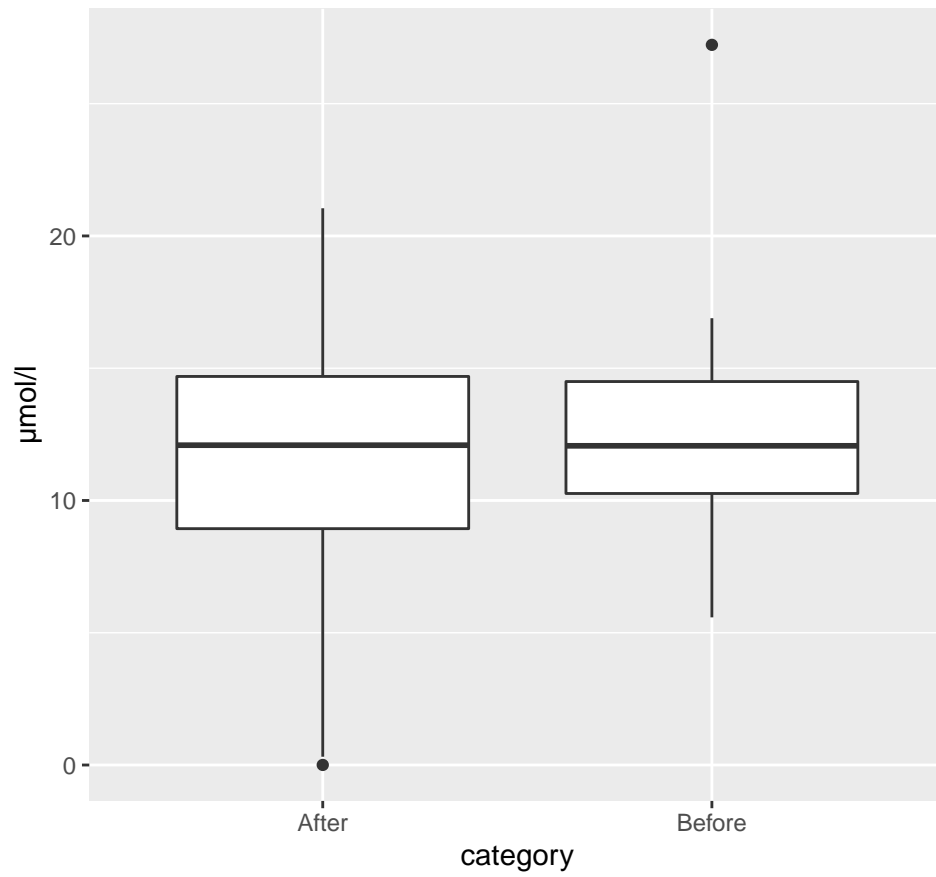

SM.a.C35.0

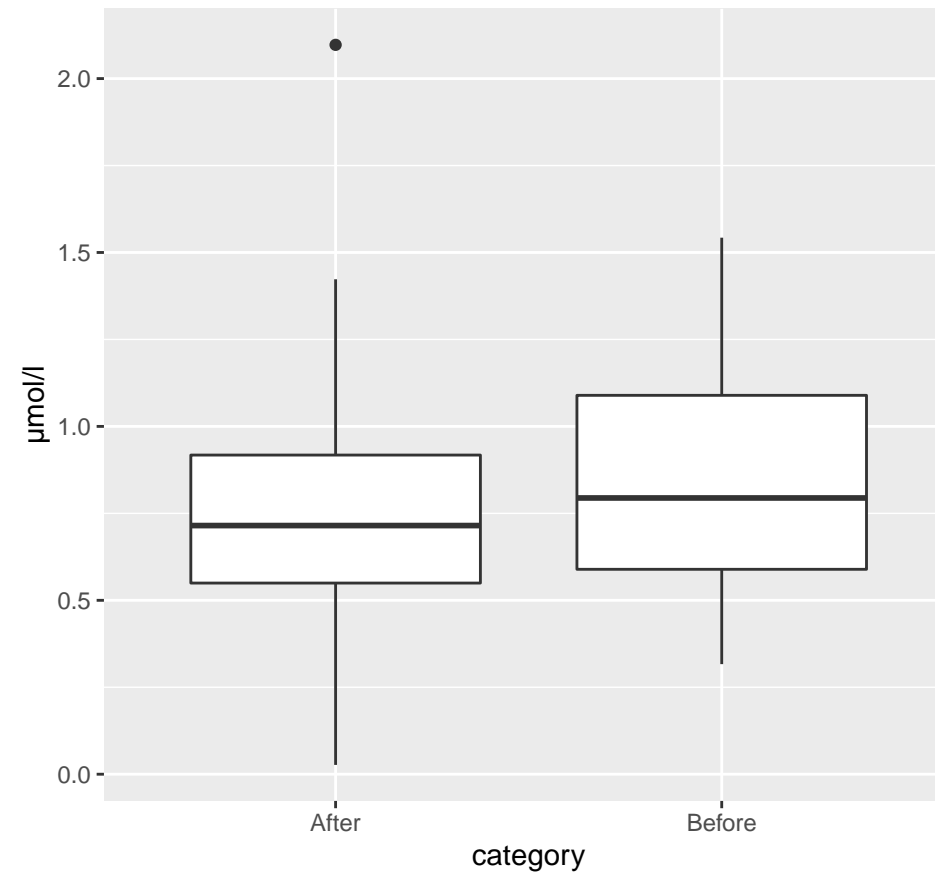

SM.a.C35.1

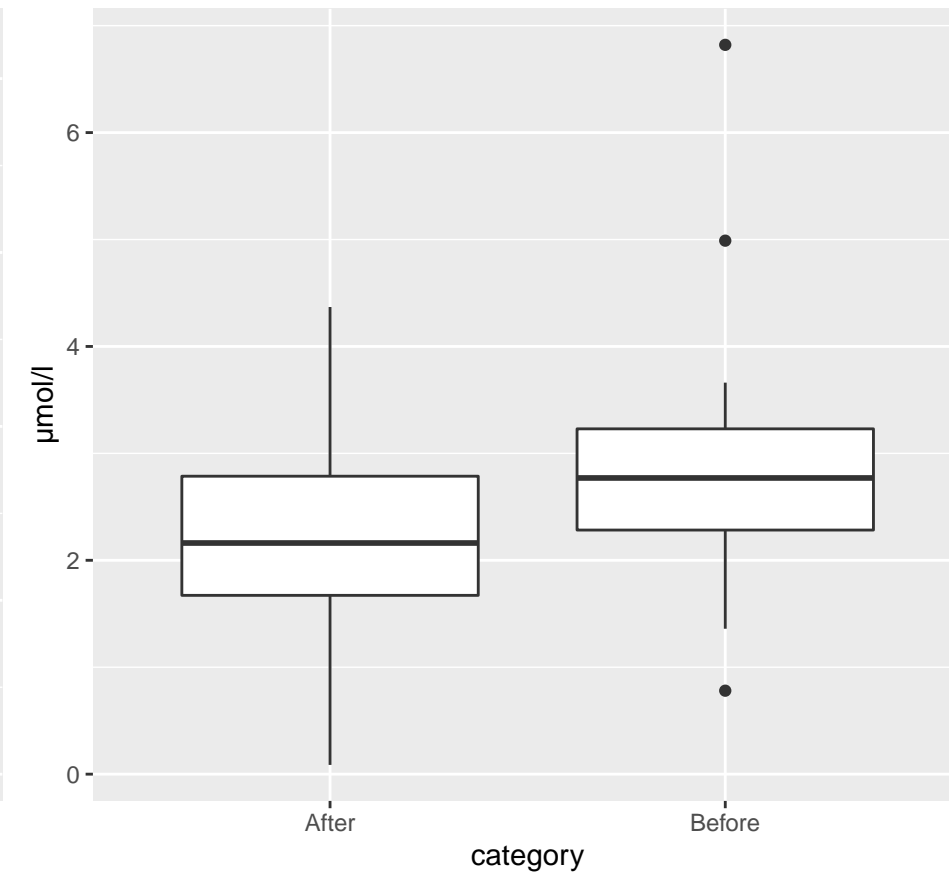

SM.a.C35.2

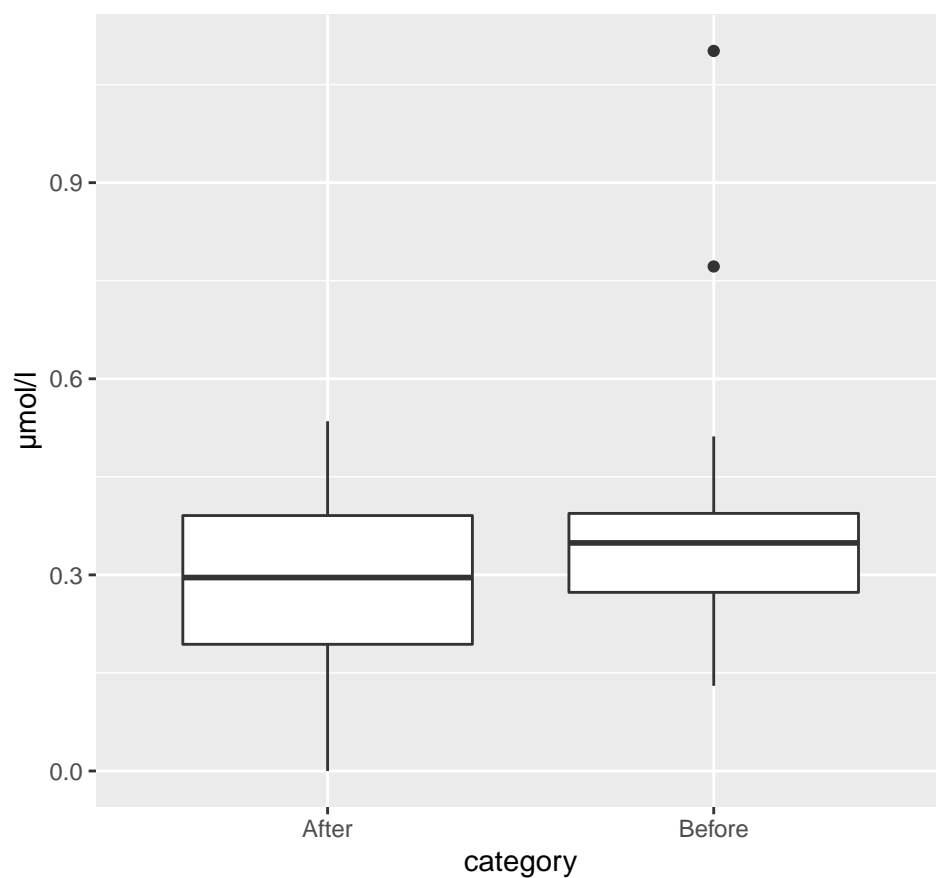

SM.a.C36.1

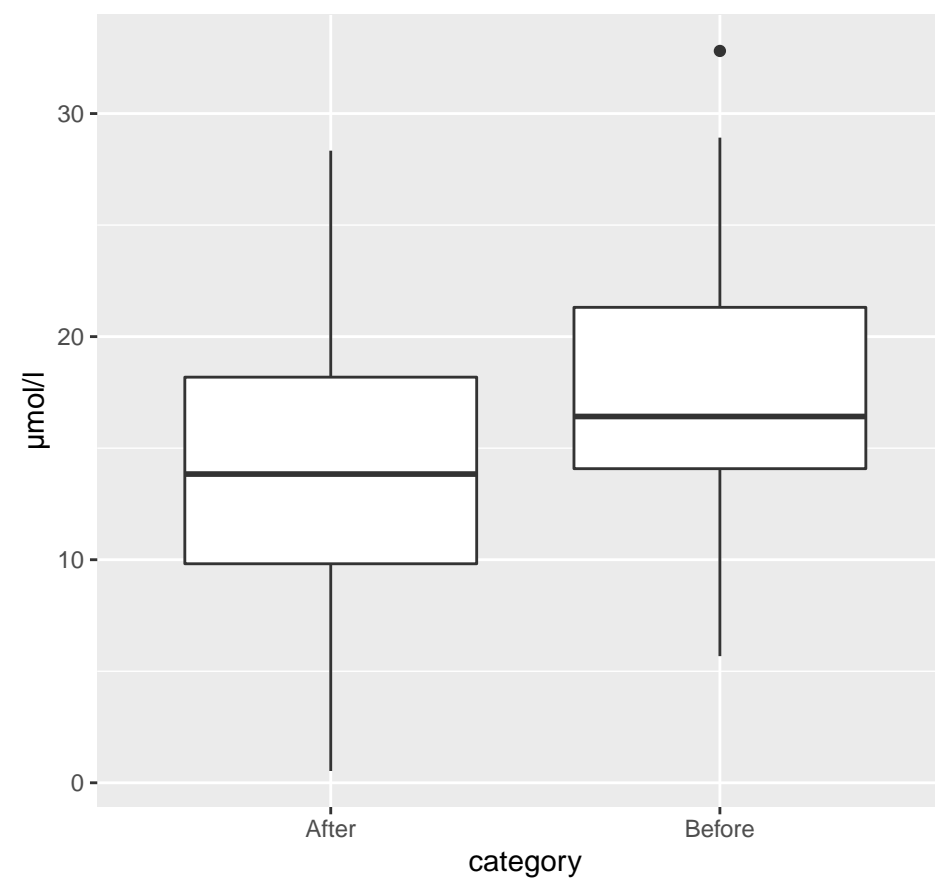

SM.a.C36.2

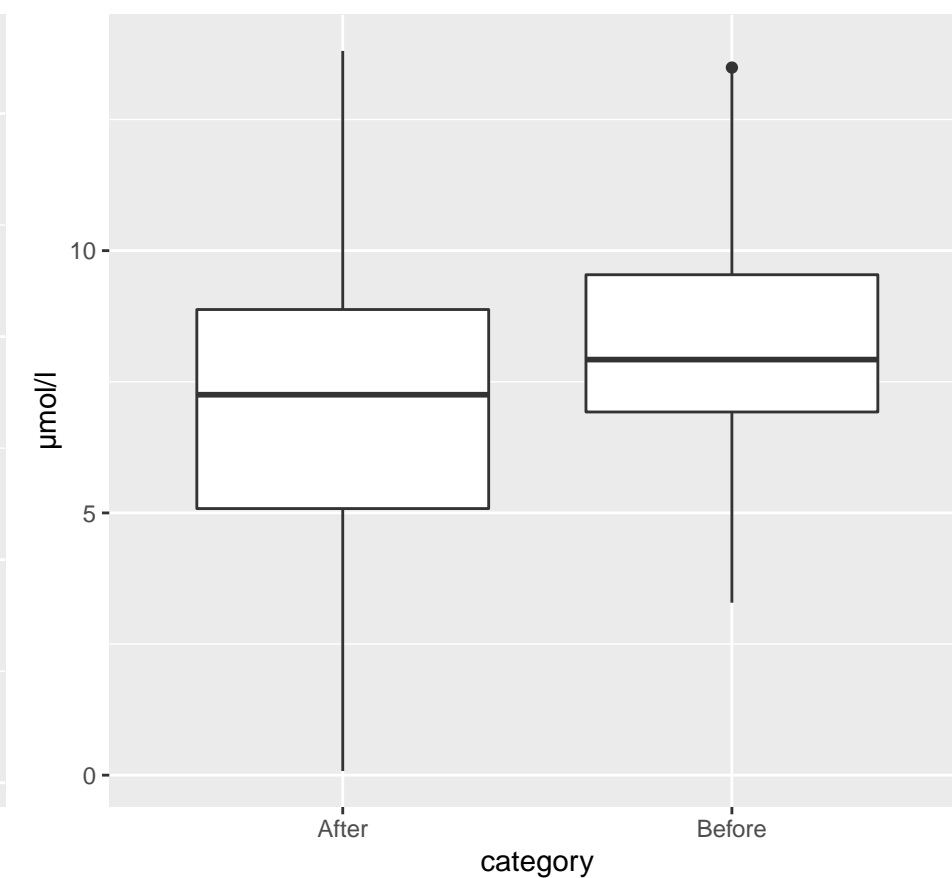

SM.a.C36.3

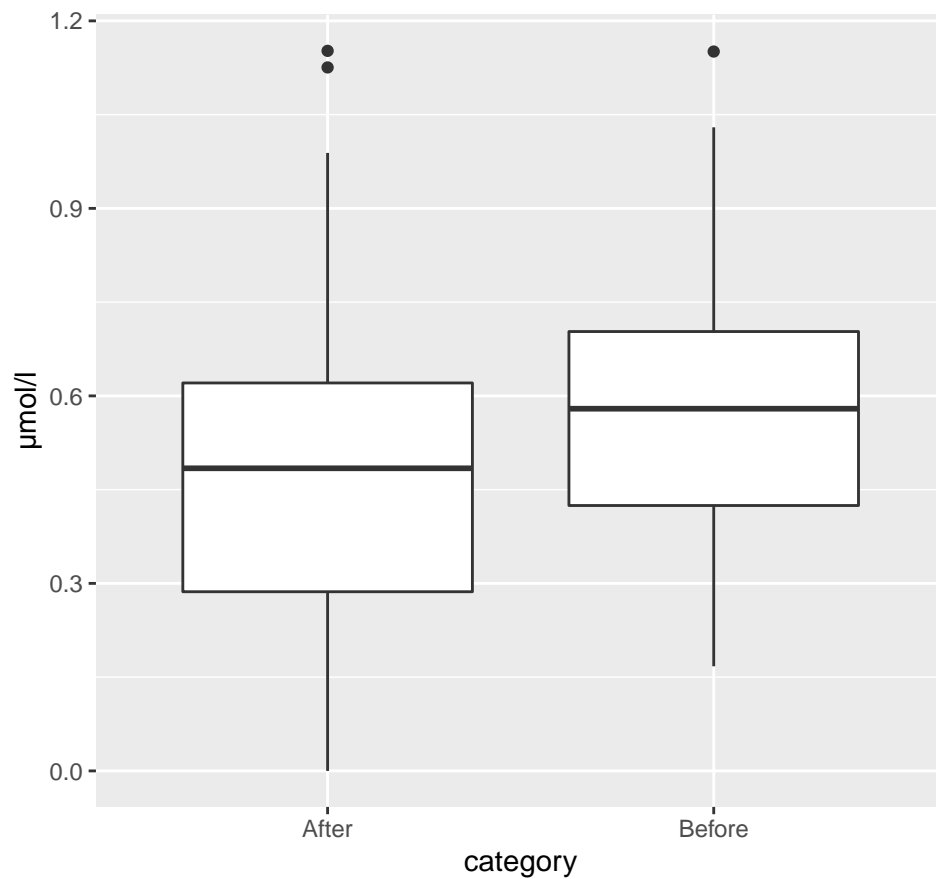

SM.a.C38.1

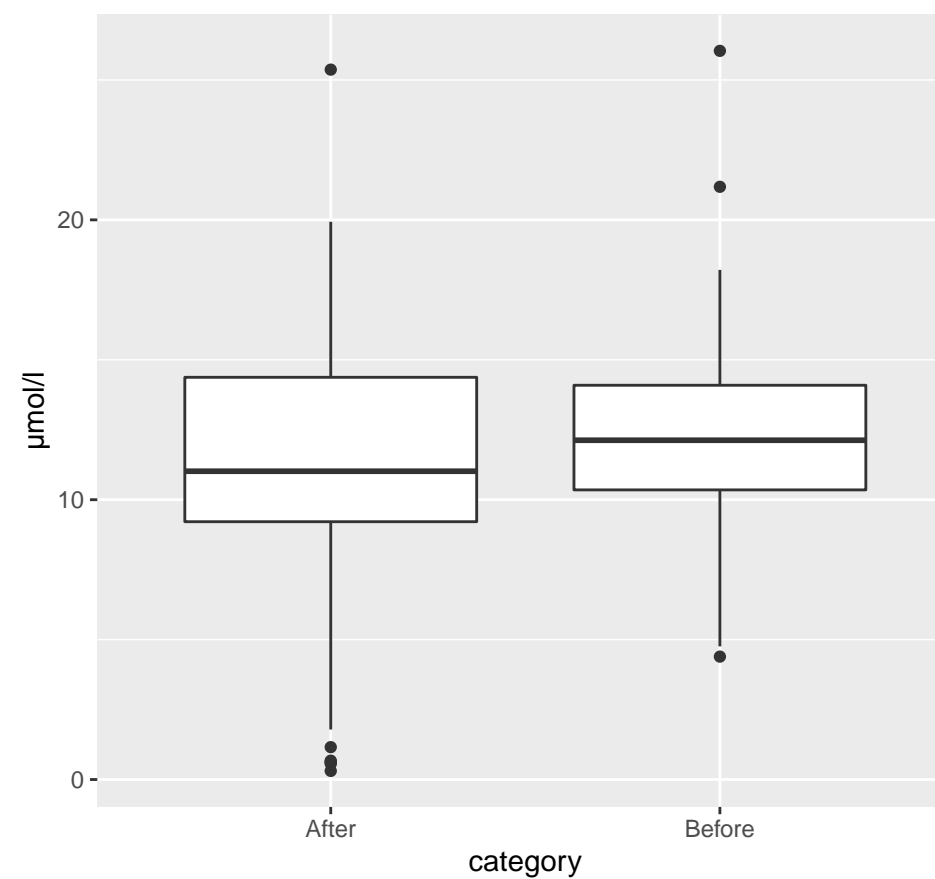

SM.a.C38.2

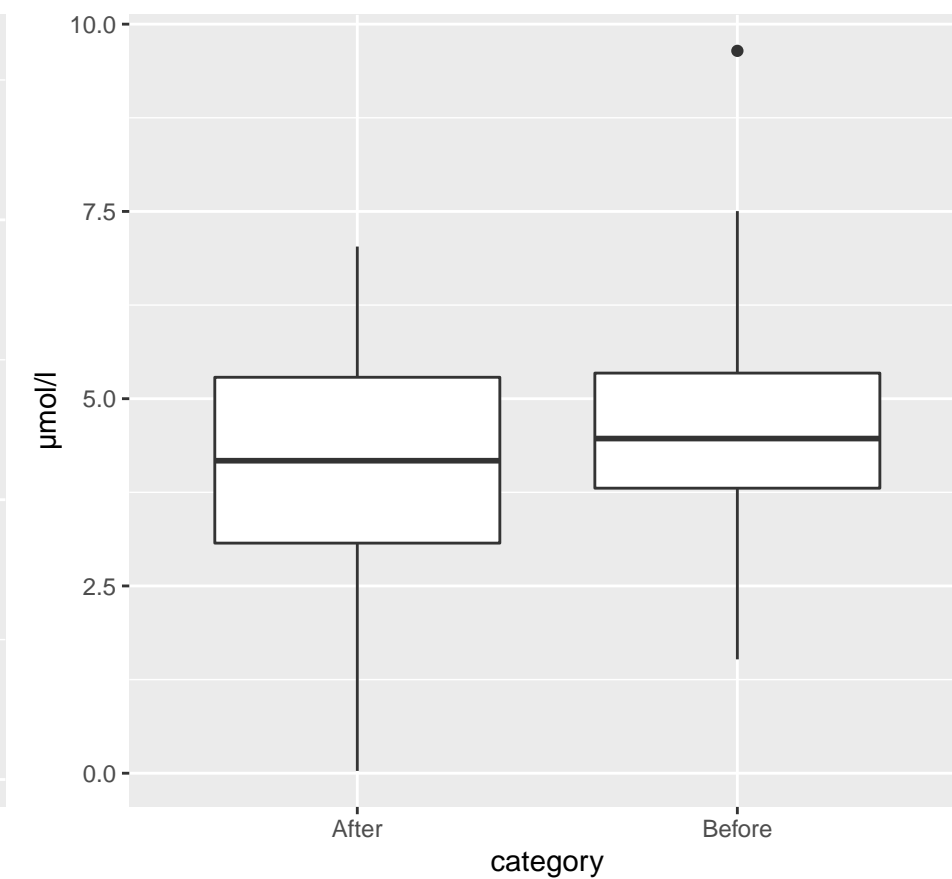

SM.a.C39.1

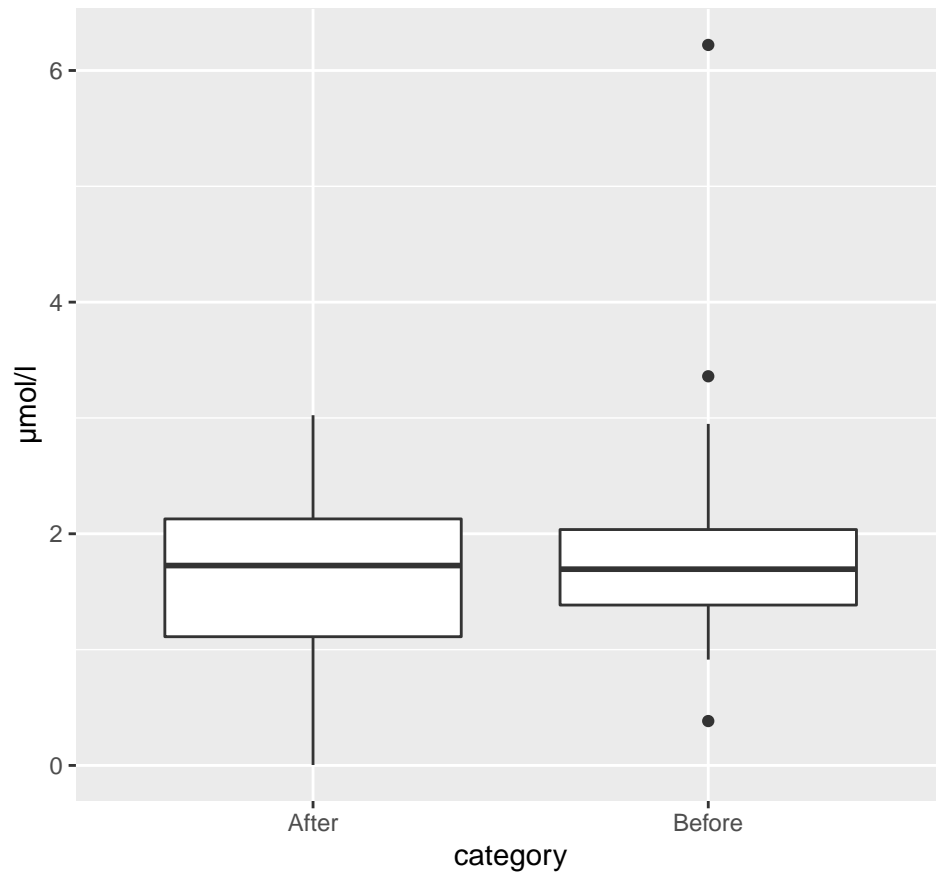

SM.a.C40.2

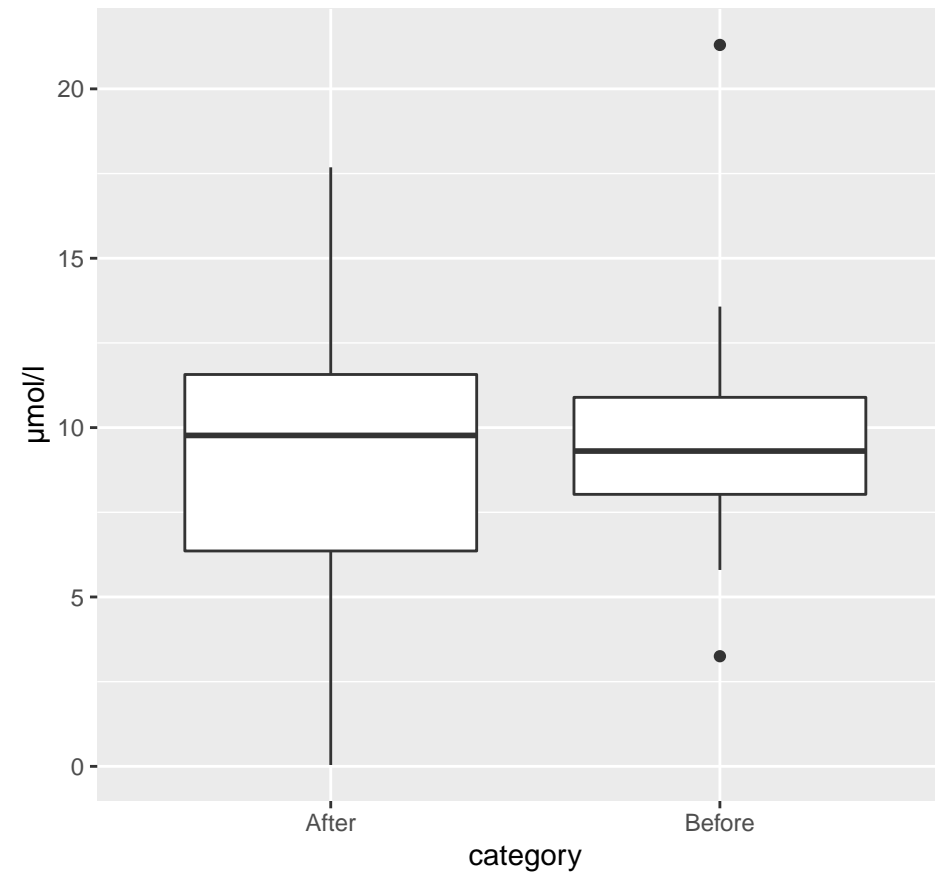

SM.a.C41.1

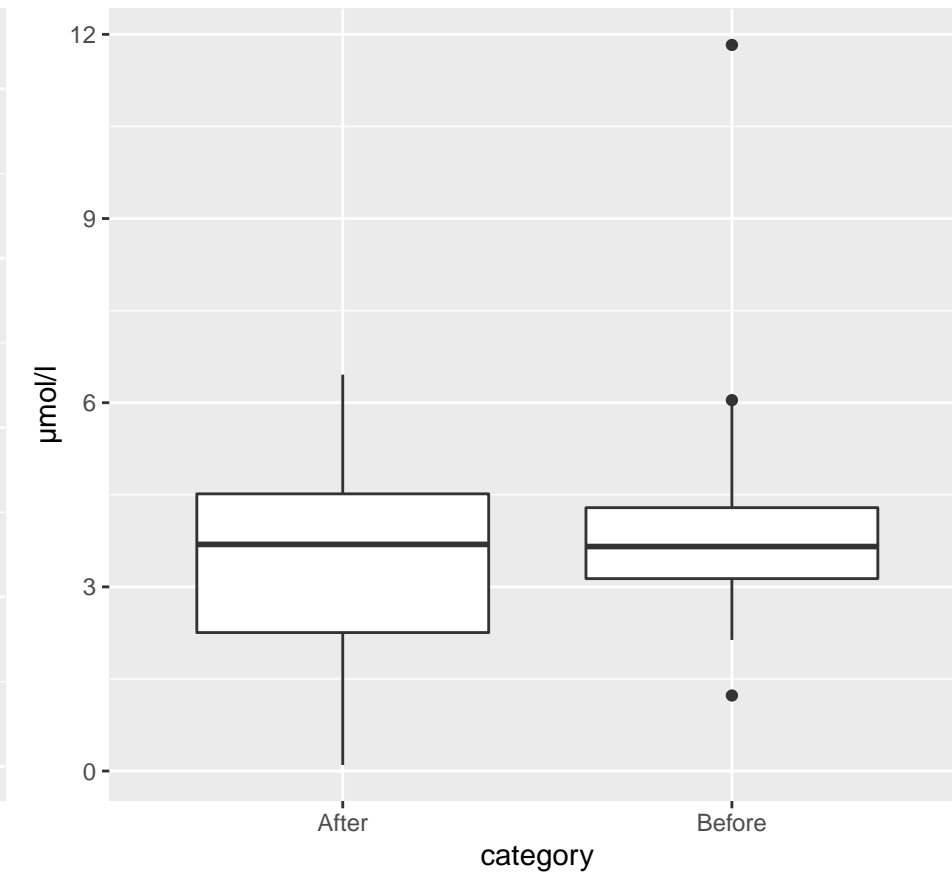

SM.a.C41.2

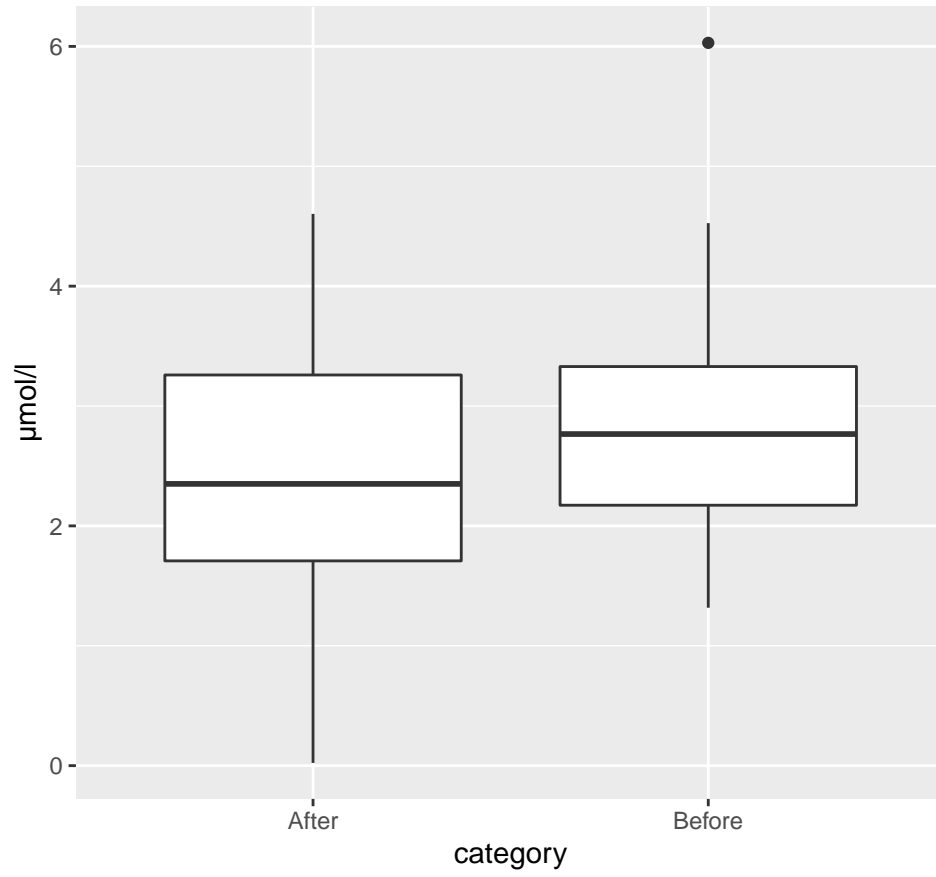

SM.a.C42.1

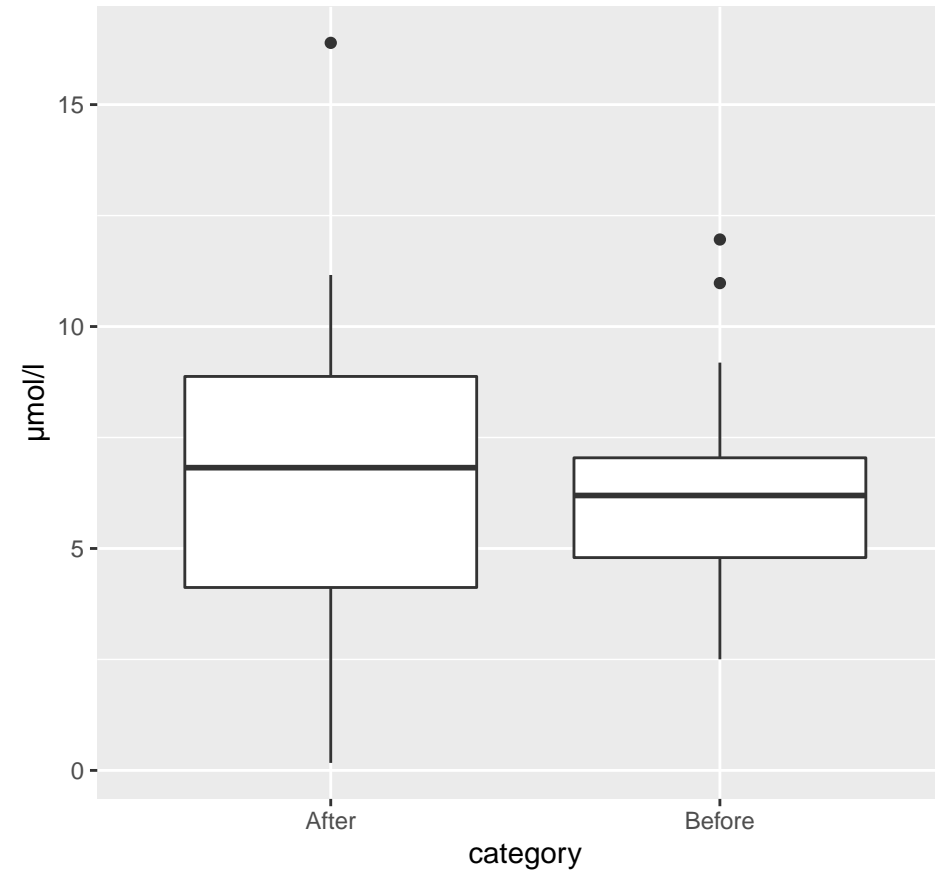

SM.a.C42.2

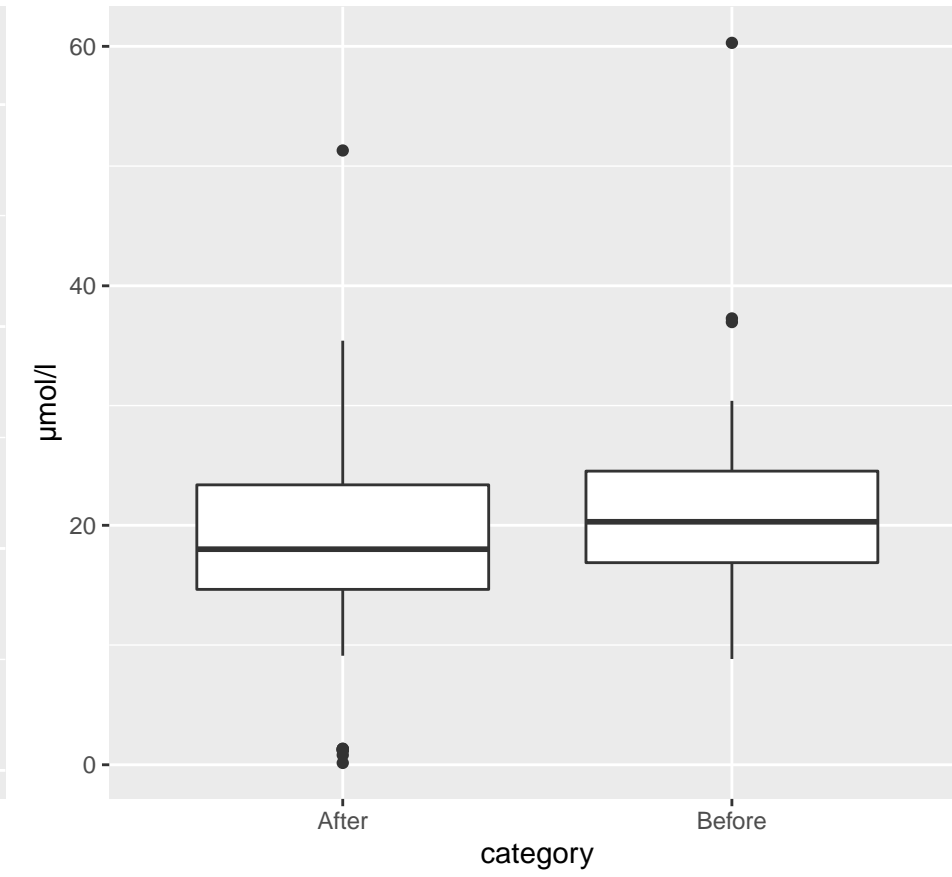

SM.a.C42.3

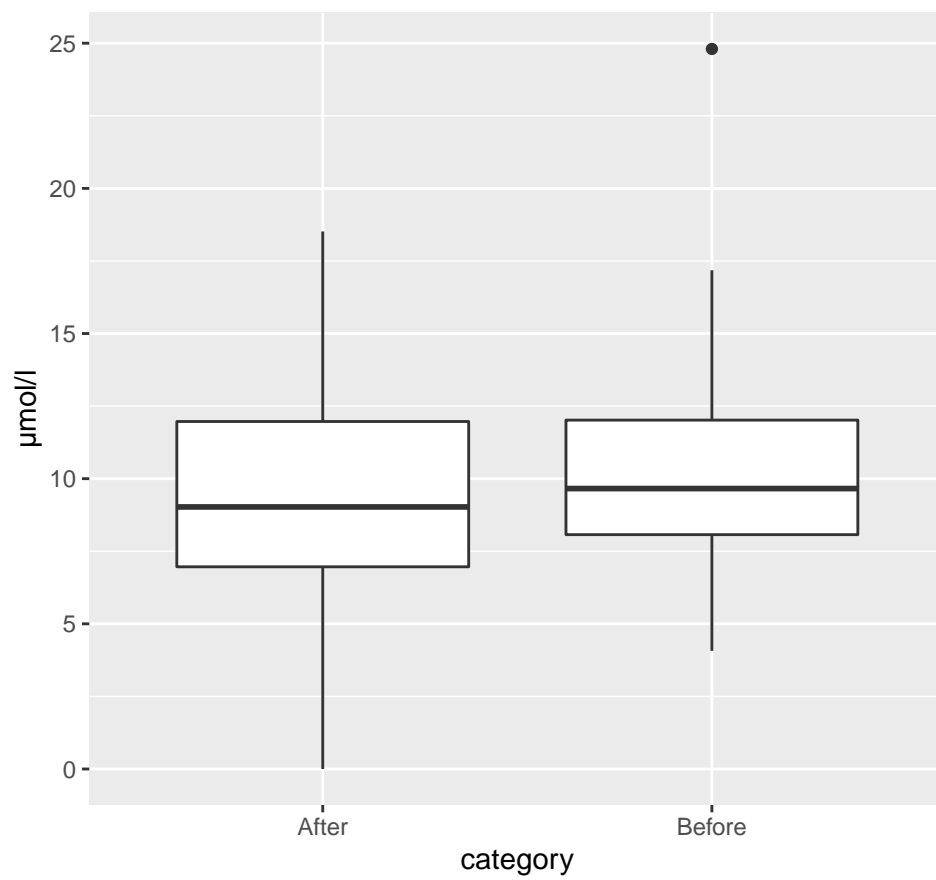

SM.a.C42.4

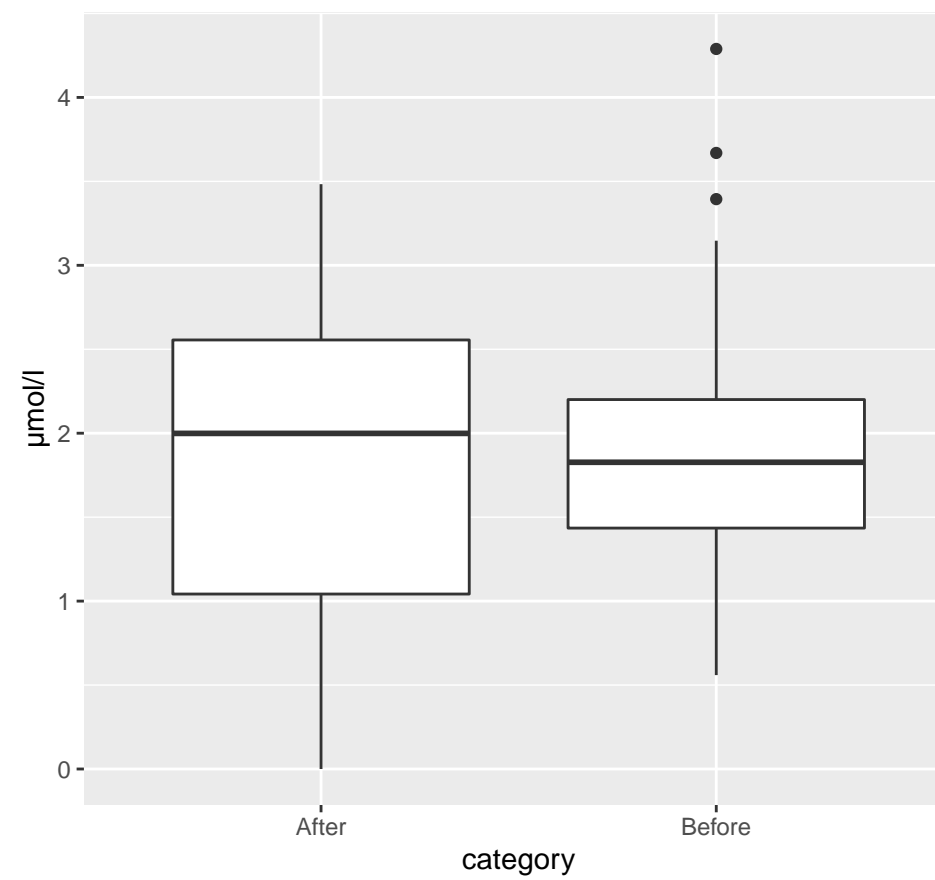

SM.a.C42.6

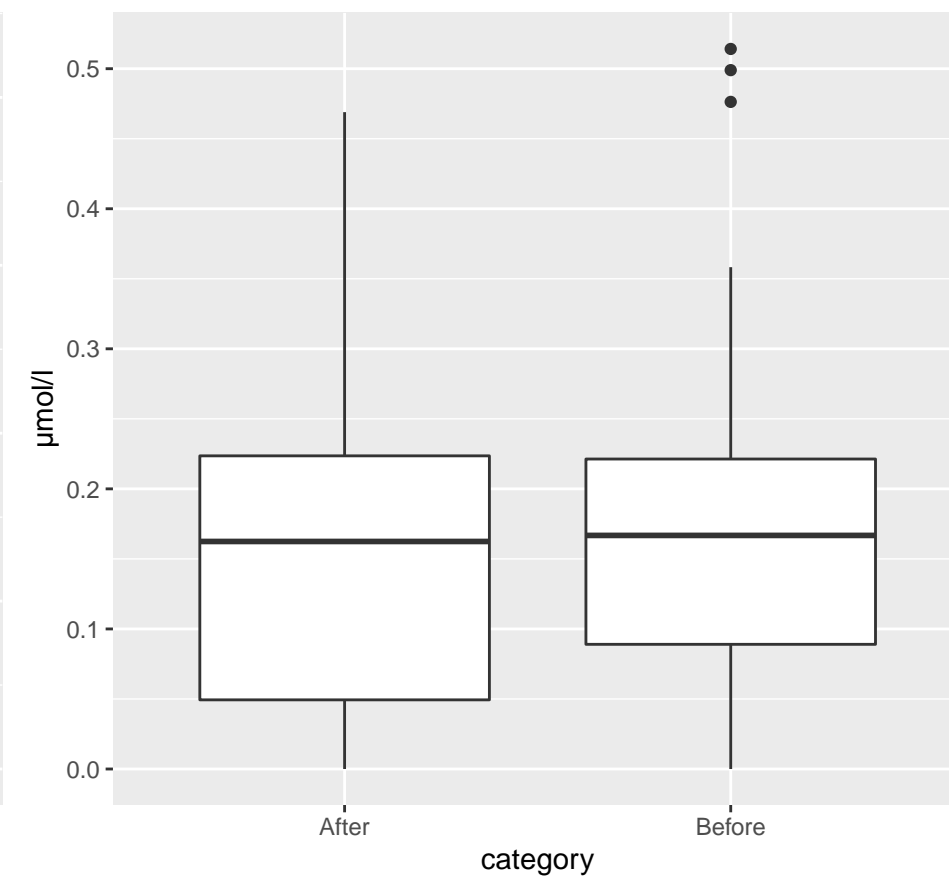

Sum\_Lyso.PC.a

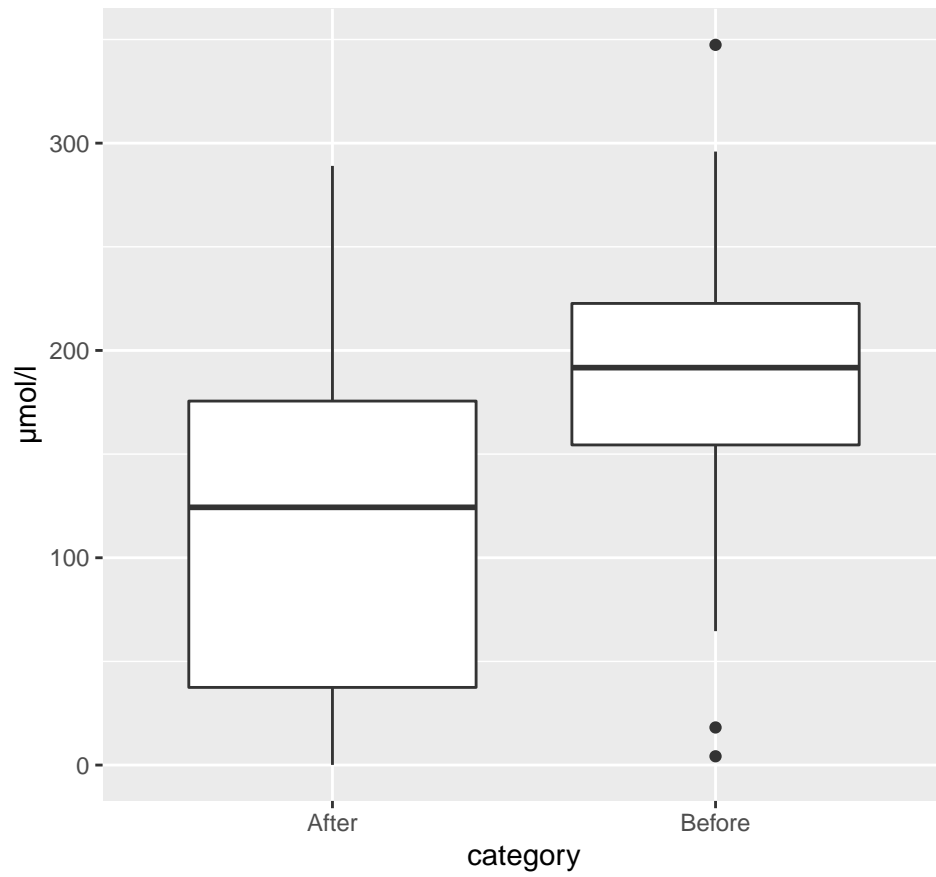

Sum\_Lyso.PC.e

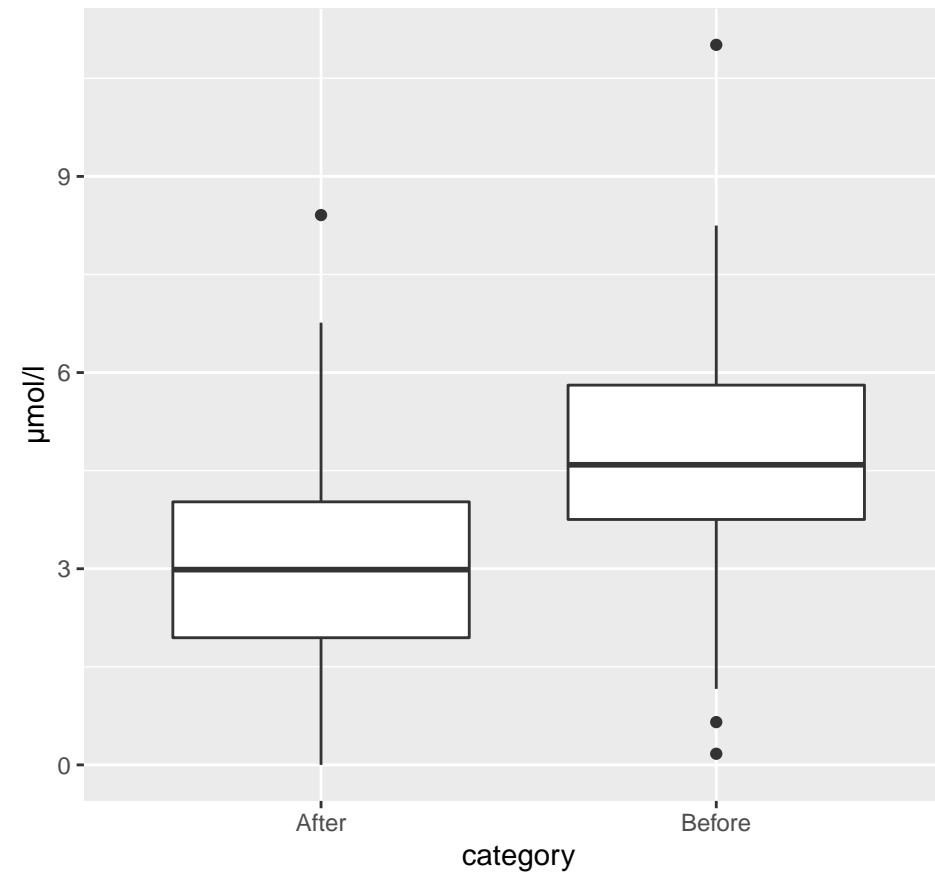

Sum\_Lyso.PC

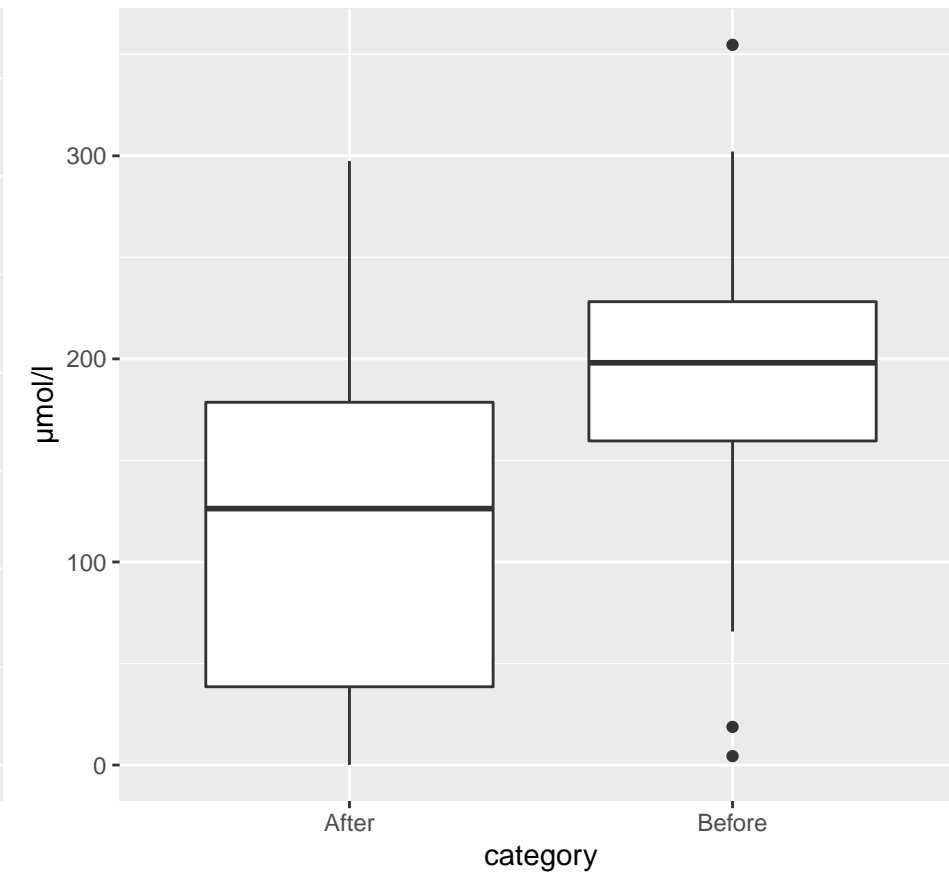

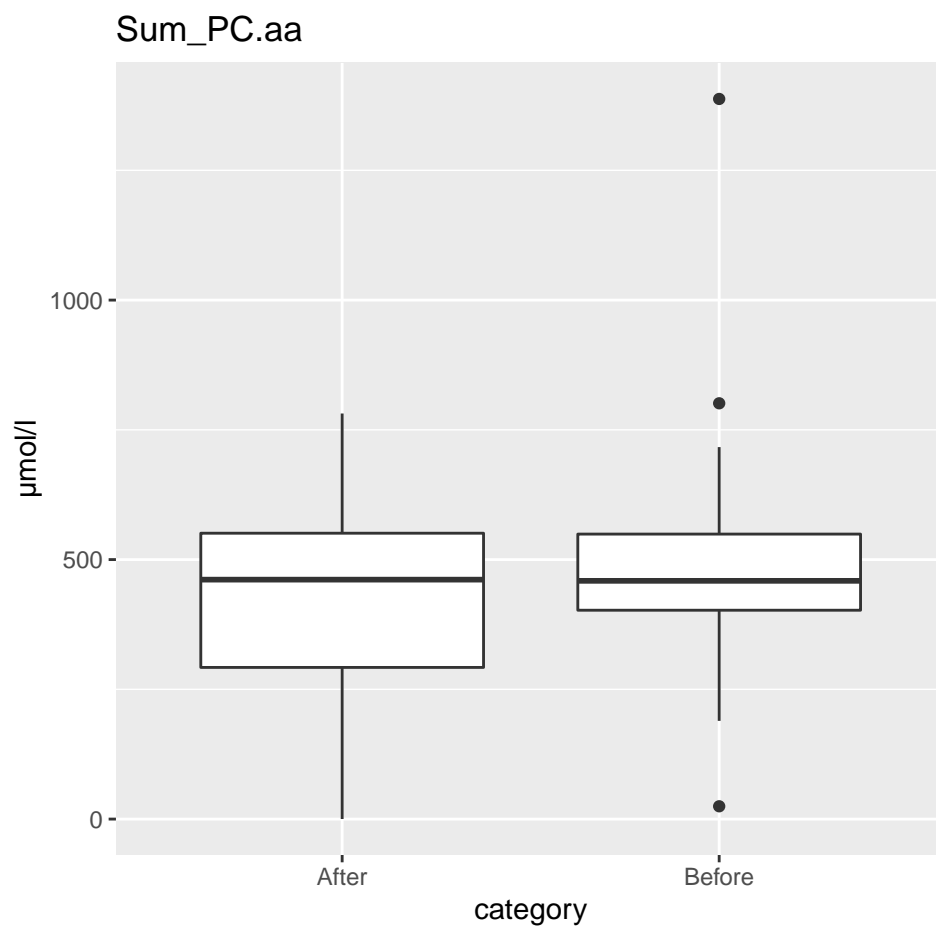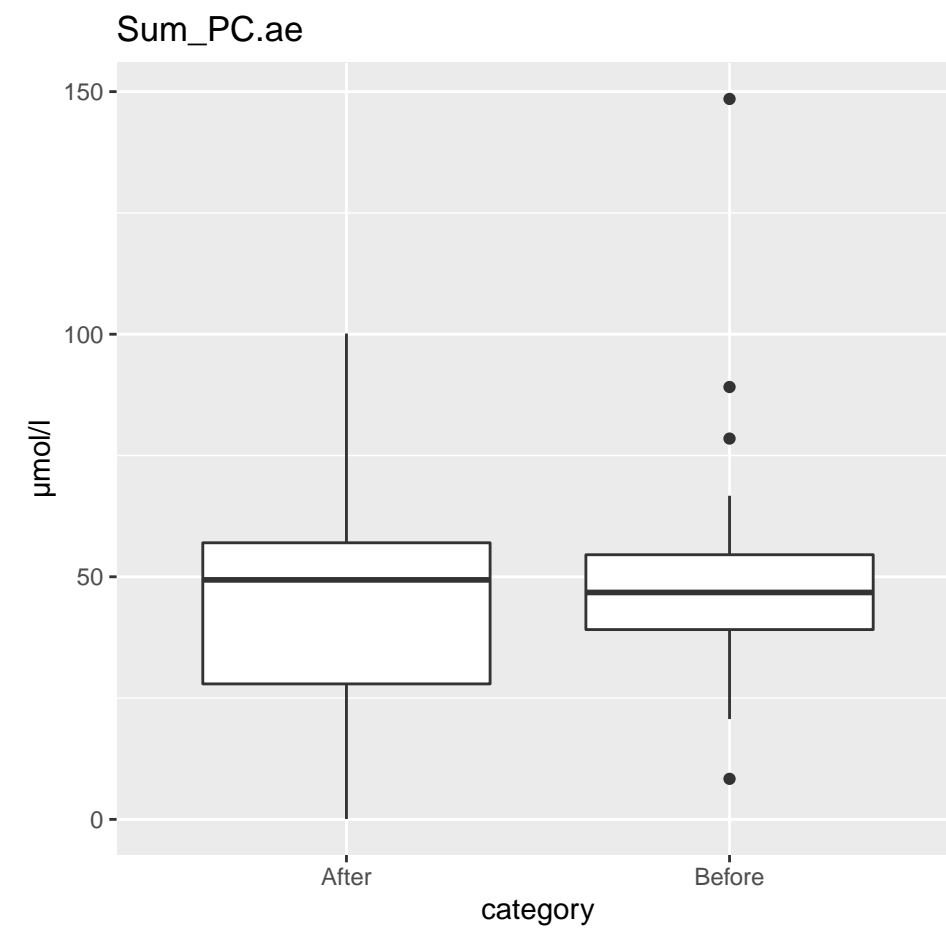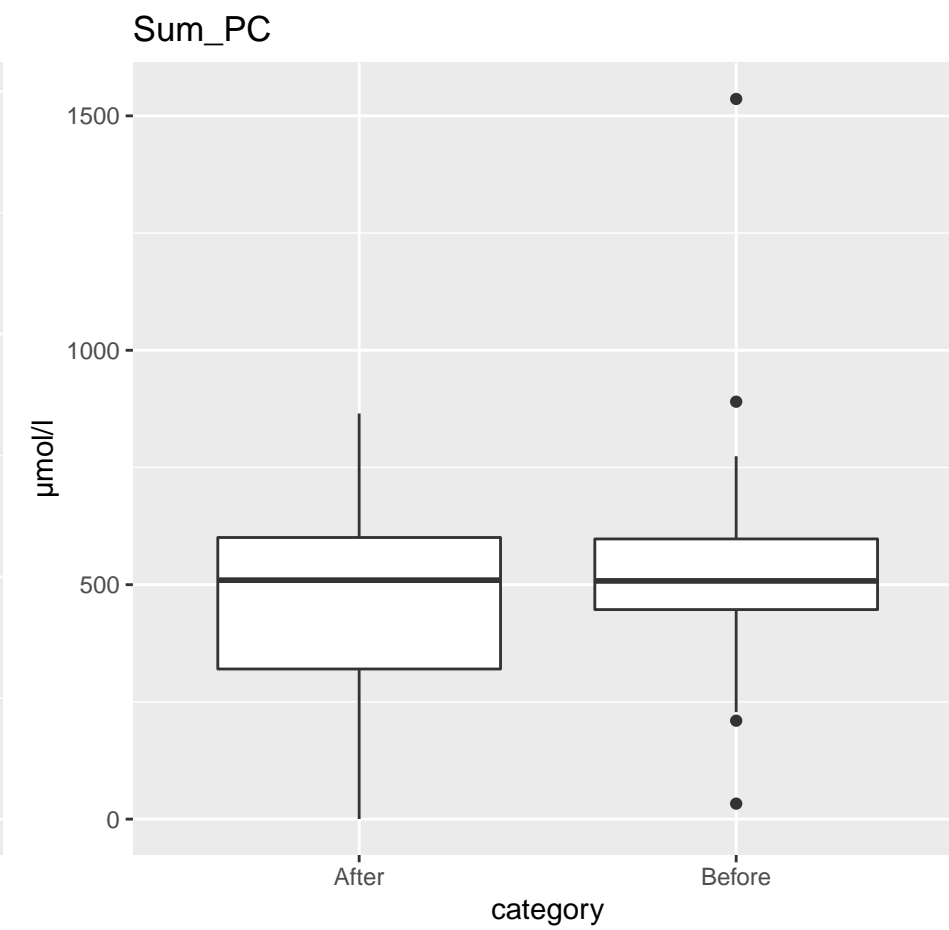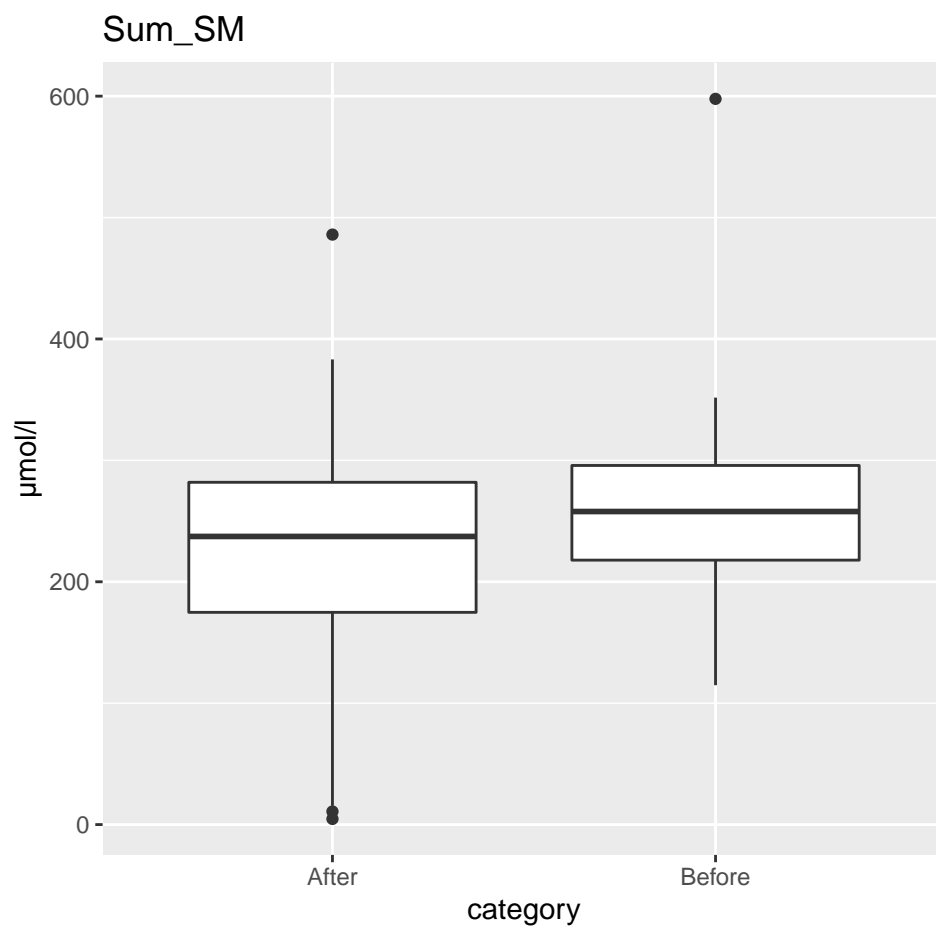

Supplement: s1 [file s1]
