# Supplementary material for: Impact of Treatment with RUTF on Plasma Lipid Profiles of Severely Malnourished Pakistani Children
Source: Nutrients. 2020 Jul 21;12(7):2163. doi: 10.3390/nu12072163 (PMC7401247; doi:10.3390/nu12072163)
Supplement: Supplementary file 1 [file nutrients-12-02163-s001.zip › Supplementary Material/Supplementary Tables S1-S8.xlsx]

## Sheet: Table S1
Table S1. Median and interquartile ranges of total glycerophospholipid Fatty acids of severe malnourished children (n=41), pre- and post- treatment with RUTF versus heathy European children as reported by Glaser et al.†
SFA	At baseline	After treatment	Healthy Children
Saturated FattyA
C14.0	1.18[0.60]	0.77[0.59]	0.61[0.09]
C16.0	30.76[2.52]	27.23[2.80]	28.74[2.32]
C17.0	0.53[0.16]	0.44[0.16]	0.33[0.05]
C18.0	15.93[2.34]	17.73[3.83]	11.87[1.11]
ΣSFA	48.78[2.68]	46.91[4.45]	43.07[1.72]
MUFA
C15.1	0.1[0.08]	0.07[0.06]	0.06[0.04]
C16.1n.7	1.22[0.83]	0.90[0.39]	0.89[0.39]
C18.1n.9	19.2[4.03]	16.87[5.16]	11.78[1.08]
C18.1n.7	1.7[0.55]	1.58[0.41]	1.58[0.28]
C20.1n.9	0.31[0.13]	0.29[0.11]	0.16[0.08]
C22.1.t	0.22[0.10]	0.23[0.13]	0.13[0.10]
ΣMUFA	23.26[5.46]	20.49[6.35]	14.16[1.71]
n-9 FA
C20.3n.9	0.30[0.41]	0.20[0.24]	0.17[0.06]
Trans FA
C16.1.t	0.07[0.04]	0.07[0.04]	0.02[0.01]
C18.1.t	0.34[0.34]	0.36[0.31]	0.11[0.03]
C18.2.tt	0.09[0.08]	0.08[0.04]	0.05[0.04]
Polyunsaturated FA
n-6 PUFA
C18.2n.6	16.84[5.16]	18.76[5.51]	22.27[4.22]
C18.3n.6	0.12[0.04]	0.10[0.08]	0.11[0.11]
C20.2n.6	0.42[0.15]	0.42[0.12]	0.41[0.09]
C20.3n.6	2.24[1.05]	2.54[0.59]	3.29[0.59]
C20.4n.6	4.19[2.07]	5.97[2.12]	9.64[2.73]
C22.4n.6	0.37[0.17]	0.47[0.19]	0.31[0.07]
C22.5n.6	0.32[0.21]	0.42[0.23]	0.30[0.14]
Σn-6 PUFA	24.98[6.32]	29.35[5.57]	36.47[2.71]
n-3 PUFA
C18.3n.3	0.15[0.11]	0.19[0.16]	0.23[0.17]
C20.3n.3	0.11[0.07]	0.11[0.08]	0.06[0.01]
C20.5n.3	0.18[0.08]	0.23[0.09]	0.64[0.68]
C22.5n.3	0.42[0.20]	0.60[0.22]	0.72[0.45]
C22.6n.3	0.68[0.41]	1.09[0.63]	4.02[1.32]
Σn-3 PUFA	1.5[0.88]	2.36[0.81]	5.82[2.05]
ΣPUFA	26.7[7.28]	32.05[5.83]
Ratios
n6/n3 PUFA	16.41[5.92]	12.91[4.93]
Mead acid/AA	0.07[0.09]	0.03[0.05]
EPA/AA	0.04[0.03]	0.03[0.02]
C22.5n6/DHA	0.49[0.27]	0.40[0.15]
AA/LA ratio	0.24[0.15]	0.29[0.18]
Data for individual fatty acids and fatty acid classes are given as % w/w. AA arachidonic acid; DHA docosahexaenoic acid; EPA eicosapentaenoic acid; LA linoleic acid; MUFA monounsaturated fatty acids; PUFA polyunsaturated fatty acids; SFA saturated fattz acids. The FA composition in healthy children as reported by Glaser et al. (2010)†(Glaser C, Demmelmair H, Sausenthaler S, Herbarth O, Heinrich …

## Sheet: Table S2
Table S2. Metabolites (a) Total glycerophospholipid Fatty acids (b) phospholipid species identified as significant features between fatty acid profiles of severe malnourished children (n=41), pre- and post- treatment with RUTF using significance analysis of microarray and empirical bayesian analysis of microarray (EBAM)
Significance Analysis of Microarray					Empirical Bayesian Analysis of Microarray (EBAM)
Metabolites	d-value	SD	p-value	q-value	Metabolites	z-value	posterior	p-value (after
								FDR correction)
A. Fatty acids
C14:0	-2.03	0.19299	*	0.008	C14:0	-2.03	0.9516	*
C16:0	-7.06	0.49	****	0	C16:0	-7.06	1	****
C17:0	-2.63	0.030042	**	0.001	C17:0	-2.63	0.9936	**
SFA	-3.52	0.9021	***	0	SFA	-3.52	0.9999	***
C15:1	-1.87	0.014062	*	0.01
C18:1n-9	-1.87	1.0527	*	0.01
MUFA	-1.95	1.2058	*	0.009
C20:3n-9	-1.95	0.05728	*	0.009
C18:2n-6	3.22	0.8345	***	0	C18:2n-6	3.22	0.9951	**
C18:3n-6	-2.19	0.012934	*	0.005	C18:3n-6	-2.19	0.9705	*
C20:4n-6	4.69	0.39	****	0	C20:4n-6	4.69	0.9999	****
C22:4n-6	3.2	0.034557	***	0	C22:4n-6	3.2	0.9948	**
C22:5n-6	2.69	0.034169	**	0.001	C22:5n-6	2.69	0.9819	*
n-6 PUFA	4.56	1.07	****	0	n-6 PUFA	4.56	0.9999	***
C18:3n-3	2.67	0.036702	**	0.001	C18:3n-3	2.67	0.9811	*
C20:3n-3	2.21	0.013291	*	0.005
C20:5n-3	2.26	0.019021	*	0.004	C20:5n-3	2.26	0.9518	*
C22:5n-3	4.54	0.039097	****	0	C22:5n-3	4.54	0.9999	***
C22:6n-3	4.69	0.09	****	0	C22:6n-3	4.69	0.9999	****
n-3 PUFA	5.7	0.14	****	0	n-3 PUFA	5.7	1	****
PUFA	4.95	1.12	****	0	PUFA	4.95	!	****
n-6 :n-3 PUFA ratio	-3.66	1.0268	****	0	n-6: n-3 ratio	-3.66	0.9999	****
Mead: AA ratio	-3.09	0.016482	**	0.001	Mead: AA ratio	-3.09	0.999	***
C22:5n-6: DHA ratio	-2.83	0.03936	**	0.001	C22:5n6: DHA ratio	-2.83	0.9971	**
AA:LA ratio	2.37	0.025	**	0.003	LA:AA ratio	-2.82	0.9969	**
B. Phospholipid species
Lyso.PC.a.C14.0	-3.66	0.03	***	0.001	Lyso.PC.a.C14.0	-3.48	0.999	****
Lyso.PC.a.C16.0	-4.03	8.98	****	0	Lyso.PC.a.C16.0	-4.03	0.9999	***
Lyso.PC.a.C16.1	-3.54	0.05	***	0.002	Lyso.PC.a.C16.1	-3.42	0.9988	**
Lyso.PC.a.C18.0	-3.71	6.79	***	0.001	Lyso.PC.a.C18.0	-3.71	0.9996	***
Lyso.PC.a.C18.1	-4.12	1.07	****	0	Lyso.PC.a.C18.1	-4.11	0.9999	****
Lyso.PC.a.C18.3	-3.35	0.01	***	0.002	Lyso.PC.a.C18.3	-2.98	0.9939	**
Lyso.PC.a.C20.3	-2.69	0.05	**	0.012	Lyso.PC.a.C20.3	-2.58	0.9767	*
Lyso.PC.e.C16.0	-4.2	0.09	****	0	Lyso.PC.e.C16.0	-4.13	0.9999	****
Lyso.PC.e.C18.0	-4.15	0.33	****	0	Lyso.PC.e.C18.0	-4.13	0.9999	****
Lyso.PC.e.C18.1	-3.03	0.04	**	0.005	Lyso.PC.e.C18.1	-2.88	0.9912	**
PC.aa.C30.0	-2.69	0.19	**	0.012	PC.aa.C30.0	-2.66	0.9819	*
PC.aa.C32.0	-2.37	1.32	*	0.027	PC.aa.C32.0	-2.37	0.9552	*
PC.aa.C32.2	-2.41	0.07	*	0.026	PC.aa.C32.2	-2.35	0.9531	*
PC.aa.C34.1	-2.61	11.18	**	0.014	PC.aa.C34.1	-2.61	0.9784	*
PC.aa.C34.3	-2.39	0.32	*	0.027	PC.aa.C34.3	-2.37	0.9562	*
PC.aa.C36.1	-2.84	3.03	**	0.009	PC.aa.C36.1	-2.84	0.9898	*
PC.ae.C30.0	-2.53	0.02	**	0.017	PC.ae.C30.0	-2.34	0.9516	*
PC.ae.C34.0	-3.29	0.13	***	0.002	PC.ae.C34.0	-3.25	0.9977	**
PC.ae.C36.0	-4.04	0.03	****	0	PC.ae.C36.0	-3.8	0.9997	***
PC.ae.C36.1	-3.25	0.31	***	0.002	PC.ae.C36.1	-3.23	0.9975	**
PC.ae.C36.2	-2.45	0.44	*	0.023	PC.ae.C36.2	-2.44	0.9636	*
PC.ae.C38.3	-2.64	0.27	**	0.013	PC.ae.C38.3	-2.62	0.9793	*
PC.ae.C40.2	-3.02	0.08	**	0.006	PC.ae.C40.2	-2.96	0.9932	**
SM.a.C30.1	-2.4	0.07	*	0.026	SM.a.C30.1	-2.35	0.9524	*
SM.a.C31.1	-2.93	0.03	**	0.007	SM.a.C31.1	-2.74	0.9857	*
SM.a.C32.1	-2.56	0.87	**	0.016	SM.a.C32.1	-2.55	0.9742	*
SM.a.C32.2	-2.93	0.06	**	0.007	SM.a.C32.2	-2.84	0.9901	**
SM.a.C33.2	-2.77	0.02	**	0.011	SM.a.C33.2	-2.51	0.9711	*
SM.a.C35.1	-3.01	0.24	**	0.006	SM.a.C35.1	-2.99	0.994	**
SM.a.C35.2	-2.63	0.03	**	0.014	SM.a.C35.2	-2.5	0.9697	*
SM.a.C36.1	-2.74	1.46	**	0.011	SM.a.C36.1	-2.73	0.9855	*
SM.a.C36.2	-2.53	0.67	**	0.017	SM.a.C36.2	-2.52	0.9716	*
ΣLyso.PC	-4.09	16.79	****	0	ΣLyso.PC	-4.09	0.9999	****
ΣLyso.PC.a	-4.06	16.41	****	0	ΣLyso.PC.a	-4.06	0.9999	****
ΣLyso.PC.e	-4.3	0.44	****	0	ΣLyso.PC.e	-4.28	1	****
Statistically significant p-values are expressed as ****p<0.0001, ***p<0.001, **p<0.01, *p<0.05. Lyso.PC.a acyl-lysophosphatidylcholines; PC.aa diacyl-phosphatidylcholines; PCae acyl-alkyl-phosphatidylcholines; SM sphingomyelins; LysoPC.a acyl-lysophosphatidylcholines

## Sheet: Table S3
Table S3. Significant results from the linear models for the change in total glycerophospholipid fatty acids with child age at baseline in severe malnourished children treated with RUTF
Analytes	Regression coefficient (β)	p-Value	p-value ( FDR adjusted)
C14.0	-0.0610882	0.00215316	0.0132778
C16.0	0.0601979	0.0187179	0.0692563
C17.0	-0.011637	0.571764	0.839738
C18.0	0.0734895	0.0010102	0.00972097
SFA	0.0720623	0.00115797	0.00972097
C14.1	-0.0643499	0.0327356	0.100935
C15.1	-0.082419	0.0010973	0.00972097
C16.1.t	-0.0432345	0.107585	0.284332
C16.1n.7	-0.0710853	0.010212	0.0452751
C18.1.t	-0.00707322	0.685607	0.839738
C18.1n.9	-0.0827439	0.00131365	0.00972097
C18.1n.7	-0.00620696	0.815265	0.8601
C20.1n.9	-0.0107694	0.72626	0.839738
C22.1.t	-0.070571	0.0110129	0.0452751
MUFA	-0.0842375	0.00111346	0.00972097
Mead acid (C20.3n.9)	0.00647839	0.719039	0.839738
C18.2.tt	0.00481761	0.836854	0.8601
C18.2n.6	0.0163726	0.519845	0.839738
C18.3n.6	-0.0138808	0.554024	0.839738
C18.3n.3	-0.0648537	0.0327271	0.100935
C20.2n.6	0.0488104	0.0686875	0.195495
C20.3n.6	0.0630303	0.0070423	0.0372236
C20.4n.6	0.0275517	0.34935	0.646298
C22.4n.6	0.00719209	0.797516	0.8601
n6 PUFA	0.0348441	0.182003	0.420883
C20.3n.3	-0.0221545	0.437638	0.771077
C20.5n.3	-0.010525	0.628405	0.839738
C22.5n.6	0.0258308	0.31905	0.621308
C22.5n.3	0.0268284	0.29217	0.600571
C22.6n.3	0.0126273	0.662071	0.839738
n3 PUFA	-0.011722	0.677467	0.839738
PUFA	0.0323401	0.212185	0.461815
n6: n3 ratio	0.00893294	0.665205	0.839738
Mead: AA ratio	-0.0029541	0.825376	0.8601
EPA: AA ratio	-0.0444609	0.155903	0.384561
C22.5n6: DHA ratio	-0.000921217	0.97363	0.97363
AA: LA ratio	0.0101146	0.725084	0.839738

## Sheet: Table S4
Table S4. Significant results from the linear models for the change in total glycerophospholipid fatty acids with breastfeeding status at baseline in severe malnourished children treated with RUTF
Analytes	Regression coefficient (β)	p-Value	p-value ( FDR adjusted)
C14.0	-0.563226	0.0559049	0.12928
C16.0	0.591697	0.0962784	0.201933
C17.0	-0.25643	0.392249	0.492848
C18.0	0.997401	0.0022512	0.0277648
SFA	0.919462	0.00381256	0.0352662
C14.1	-0.999495	0.0183803	0.0755634
C15.1	-0.756364	0.030371	0.101328
C16.1.t	-0.381377	0.315624	0.449157
C16.1n.7	-0.902508	0.0210533	0.0778973
C18.1.t	0.117223	0.632988	0.68884
C18.1n.7	0.0273651	0.942223	0.968395
C18.1n.9	-1.24126	0.00139403	0.0277648
C20.1n.9	-0.647675	0.147836	0.260474
C22.1.t	-1.0419	0.00818853	0.050496
MUFA	-1.21593	0.00156362	0.0277648
Mead acid (C20.3n.9)	-0.167365	0.530304	0.594583
C18.2.tt	0.0639532	0.848884	0.897392
C18.2n.6	0.303849	0.406334	0.492848
C18.3n.6	-0.664456	0.0496452	0.122458
C18.3n.3	-1.18927	0.0061311	0.0453702
C20.2n.6	0.577035	0.127995	0.23679
C20.3n.6	0.809001	0.0143963	0.0755634
C20.4n.6	1.02248	0.0328631	0.101328
n6_PUFA	0.789663	0.0386509	0.106263
C20.3n.3	-0.336023	0.412926	0.492848
C20.5n.3	-0.273064	0.370898	0.492848
C22.4n.6	0.337131	0.408185	0.492848
C22.5n.6	0.513398	0.16916	0.284496
C22.5n.3	0.575063	0.0982378	0.201933
C22.6n.3	1.01324	0.0168693	0.0755634
n3_PUFA	0.393855	0.299538	0.443316
PUFA	0.778385	0.0402078	0.106263
n6: n3 ratio	0.000512952	0.998443	0.998443
Mead: AA ratio	-0.221859	0.272321	0.419828
EPA: AA ratio	-0.567476	0.204657	0.32923
C22.5n6: DHA ratio	-0.236837	0.508383	0.587818
AA: LA ratio	0.639	0.16	0.281

## Sheet: Table S5
Table S5 Significant results from the linear models for the change in total glycerophospholipid fatty acids with child hemoglobin level at baseline in severe malnourished children treated with RUTF
Analytes	Regression coefficient (β)	p-Value	p-value ( FDR adjusted)
C14.0	0.00240433	0.965309	0.965309
C16.0	-0.0768604	0.273699	0.881798
C17.0	-0.219822	0.000510273	0.00944005
C18.0	-0.0189944	0.745577	0.957191
SFA	-0.072549	0.19856	0.816301
C14.1	0.042456	0.649303	0.957191
C15.1	0.00531971	0.940319	0.965309
C16.1.t	-0.0200833	0.802162	0.957419
C18.1.t	0.0287601	0.533472	0.957191
C16.1n.7	0.0316202	0.700853	0.957191
C18.1n.7	-0.0431721	0.568653	0.957191
C18.1n.9	0.103019	0.151365	0.816301
C20.1n.9	0.00545214	0.949195	0.965309
C22.1.t	-0.0469768	0.55348	0.957191
MUFA	0.100004	0.178323	0.816301
Mead acid (C20.3n.9)	-0.146163	0.0137232	0.169253
C18.2.tt	-0.266898	0.000283408	0.00944005
C18.2n.6	0.0734734	0.357023	0.881798
C18.3n.6	-0.0232513	0.725634	0.957191
C20.2n.6	-0.0943519	0.197967	0.816301
C20.3n.6	-0.0949674	0.127822	0.816301
C20.4n.6	-0.052827	0.520538	0.957191
C22.4n.6	-0.0358039	0.647252	0.957191
C22.5n.6	-0.0801808	0.267507	0.881798
n6_PUFA	0.00644603	0.934698	0.965309
C18.3n.3	0.0636681	0.41798	0.909722
C20.3n.3	-0.0726354	0.357486	0.881798
C20.5n.3	-0.0467642	0.417479	0.909722
C22.5n.3	-0.066065	0.328666	0.881798
C22.6n.3	-0.0378444	0.629672	0.957191
n3_PUFA	-0.0233327	0.75023	0.957191
PUFA	0.0056563	0.941421	0.965309
n6: n3 ratio	0.0212613	0.689356	0.957191
Mead: AA ratio	-0.0619627	0.174992	0.816301
EPA: AA ratio	-0.0169715	0.848409	0.965309
C22.5n6: DHA ratio	0.0195647	0.786194	0.957419
AA: LA ratio	-0.06	0.331	0.957

## Sheet: Table S6
Table S6. Significant results from the linear models for the change in polar lipid species with child age at baseline in severe malnourished children treated with RUTF
Analytes	Regression coefficient (β)	p-Value	p-value ( FDR adjusted)
Sum of hexoses	0.0708654	0.00884762	0.025512
Carn	0.0290821	0.235697	0.292167
Carn.a.C2.0	-0.0204797	0.328198	0.395242
Carn.a.C3.0	-0.0149075	0.358426	0.414104
Carn.a.C8.0	-0.00815973	0.760108	0.800468
Carn.a.C8.1	0.00103401	0.972892	0.972892
Carn.a.C9.0	-0.00890427	0.74056	0.786845
Carn.a.C10.0	-0.00486794	0.86257	0.870229
Carn.a.C10.1	0.0141386	0.623328	0.671585
Carn.a.C12.0	0.0137244	0.626436	0.671585
Carn.a.C12.1	-0.0204567	0.343985	0.405289
Carn.a.C14.0	0.0140314	0.563543	0.62094
Carn.a.C14.1	0.00370426	0.862916	0.870229
Carn.a.C14.2	0.00965023	0.583554	0.637091
Carn.a.C16.0	0.0446104	0.114707	0.16059
Carn.a.C16.1	-0.00614281	0.776928	0.811004
Carn.a.C18.0	-0.0139728	0.561549	0.62094
Carn.a.C18.1	0.0272436	0.334844	0.398464
lyso.PC.a.C14.0	0.00457443	0.806456	0.834507
lyso.PC.a.C16.0	0.0603973	0.0141824	0.0301693
lyso.PC.a.C16.1	0.0228971	0.223741	0.280265
lyso.PC.a.C18.0	0.0487837	0.0115164	0.0268715
lyso.PC.a.C18.1	0.0572492	0.0163884	0.0342144
lyso.PC.a.C18.2	0.0753875	0.00456325	0.0237271
lyso.PC.a.C18.3	0.0374799	0.0477106	0.081108
lyso.PC.a.C20.3	0.0802396	0.00132383	0.0145527
lyso.PC.a.C20.4	0.0620345	0.0449138	0.0785991
lyso.PC.a.C20.5	0.0617543	0.0100762	0.025512
lyso.PC.a.C22.6	0.0448962	0.107339	0.153895
lyso.PC.e.C16.0	0.040051	0.087743	0.130518
lyso.PC.e.C18.0	0.0343754	0.0622341	0.0974456
lyso.PC.e.C18.1	0.040542	0.0804094	0.122676
PC.aa.C30.0	0.032496	0.065637	0.101439
PC.aa.C32.0	0.0435178	0.0106797	0.025612
PC.aa.C32.1	0.0249125	0.0924691	0.13585
PC.aa.C32.2	0.0178082	0.328814	0.395242
PC.aa.C32.3	0.0150059	0.374245	0.428223
PC.aa.C34.1	0.0557564	0.00998608	0.025512
PC.aa.C34.2	0.0598678	0.00780774	0.025512
PC.aa.C34.3	0.0492238	0.00816211	0.025512
PC.aa.C34.4	0.0315219	0.166065	0.219574
PC.aa.C34.5	0.024586	0.310208	0.380565
PC.aa.C36.1	0.0498252	0.0197453	0.0405119
PC.aa.C36.2	0.0668014	0.00437426	0.0237271
PC.aa.C36.3	0.0738644	0.0012413	0.0145527
PC.aa.C36.4	0.0619095	0.00865984	0.025512
PC.aa.C36.5	0.0659354	0.0027616	0.0205394
PC.aa.C36.6	0.00417634	0.85087	0.870229
PC.aa.C38.0	0.036428	0.128738	0.178137
PC.aa.C38.2	0.0731647	0.00171611	0.015709
PC.aa.C38.3	0.0725243	0.00106945	0.0145527
PC.aa.C38.4	0.069089	0.00418545	0.0237271
PC.aa.C38.5	0.078112	0.000590518	0.0145527
PC.aa.C38.6	0.0611649	0.00974036	0.025512
PC.aa.C40.4	0.0771804	0.00118411	0.0145527
PC.aa.C40.5	0.0805468	0.00026373	0.0145527
PC.aa.C40.6	0.0610275	0.00499121	0.0243766
PC.aa.C44.12	0.0730818	0.00226996	0.0180083
PC.ae.C30.0	0.0235483	0.195849	0.248069
PC.ae.C32.0	0.0417885	0.0100594	0.025512
PC.ae.C32.1	0.0527284	0.00458591	0.0237271
PC.ae.C32.2	0.0541374	0.0141973	0.0301693
PC.ae.C34.0	0.0240791	0.140696	0.19026
PC.ae.C34.1	0.043568	0.0079873	0.025512
PC.ae.C34.2	0.0737173	0.000492862	0.0145527
PC.ae.C34.3	0.0834259	0.000618039	0.0145527
PC.ae.C34.4	0.0730085	2.63106e-05	0.00313096
PC.ae.C36.0	0.0450825	0.0307968	0.0563819
PC.ae.C36.1	0.0335031	0.0260982	0.0485263
PC.ae.C36.2	0.0484308	0.0100582	0.025512
PC.ae.C36.3	0.0714914	0.0014675	0.0145527
PC.ae.C36.4	0.0637694	0.00956675	0.025512
PC.ae.C36.5	0.0621852	0.0117499	0.0268892
PC.ae.C36.6	0.0470105	0.0233148	0.044039
PC.ae.C38.0	0.0466422	0.0500619	0.0827413
PC.ae.C38.3	0.0567786	0.00512113	0.0243766
PC.ae.C38.4	0.0647067	0.00984119	0.025512
PC.ae.C38.5	0.0599585	0.0138368	0.0301693
PC.ae.C38.6	0.0630874	0.0107614	0.025612
PC.ae.C40.0	0.0714554	0.00135219	0.0145527
PC.ae.C40.1	0.0576317	0.0141825	0.0301693
PC.ae.C40.2	0.0495304	0.00544843	0.024937
PC.ae.C40.4	0.0711907	0.00734937	0.025512
PC.ae.C40.5	0.0792695	0.00185991	0.0158092
PC.ae.C40.6	0.054744	0.0338225	0.0609831
PC.ae.C42.6	0.0656957	0.00753179	0.025512
SM.a.C30.1	0.0141678	0.402116	0.455731
SM.a.C31.1	0.0130343	0.425136	0.477275
SM.a.C32.1	0.032109	0.155305	0.207654
SM.a.C32.2	0.0305865	0.102489	0.148735
SM.a.C33.1	0.033075	0.109417	0.155008
SM.a.C33.2	0.0325512	0.0532496	0.0868042
SM.a.C33.3	0.0486231	0.0371513	0.0659852
SM.a.C34.1	0.0535258	0.0227197	0.0436072
SM.a.C34.2	0.0665557	0.00569553	0.0251025
SM.a.C35.0	0.0453292	0.0842555	0.126917
SM.a.C35.1	0.0204936	0.353821	0.412791
SM.a.C35.2	0.0246428	0.176314	0.230565
SM.a.C36.1	0.0501629	0.0457291	0.0788662
SM.a.C36.2	0.0641548	0.0105413	0.025612
SM.a.C36.3	0.0622917	0.0214333	0.0419198
SM.a.C38.1	0.0634266	0.010044	0.025512
SM.a.C38.2	0.063885	0.00913216	0.025512
SM.a.C39.1	0.0293301	0.195954	0.248069
SM.a.C40.2	0.069631	0.00661968	0.025512
SM.a.C41.1	0.0309922	0.190401	0.246279
SM.a.C41.2	0.04711	0.0590792	0.0937389
SM.a.C42.1	0.0565394	0.0489766	0.0820875
SM.a.C42.2	0.0575244	0.0214883	0.0419198
SM.a.C42.3	0.061548	0.00895156	0.025512
SM.a.C42.4	0.0786806	0.00113644	0.0145527
SM.a.C42.6	0.036295	0.132314	0.180981
ΣLyso.PC.a	0.059794	0.00828116	0.025512
ΣLyso.PC.e	0.0372307	0.0587024	0.0937389
ΣLyso.PC	0.059375	0.00860441	0.025512
ΣPC.aa	0.0654845	0.0033404	0.0209214
ΣPC.ae	0.0651747	0.00310331	0.0206032
ΣPC	0.0656967	0.00311645	0.0206032
ΣSM	0.056071	0.0213317	0.0419198

## Sheet: Table S7
Table S7. Significant results from the linear models for the change in polar lipid species with child breastfeeding status at baseline in severe malnourished children treated with RUTF
Analytes	Regression coefficient (β)	p-Value	p-value ( FDR adjusted)
Sum of hexoses	0.44774	0.225674	0.273835
Carn	-0.02851	0.93187	0.93187
Carn.a.C2.0	0.195524	0.512917	0.559974
Carn.a.C3.0	-0.210869	0.372158	0.425834
Carn.a.C8.0	-0.224894	0.548682	0.588226
Carn.a.C8.1	0.374782	0.377506	0.42784
Carn.a.C9.0	-0.189478	0.622271	0.649563
Carn.a.C10.0	-0.271929	0.49168	0.541758
Carn.a.C10.1	0.175615	0.669528	0.692816
Carn.a.C12.0	0.832614	0.0580249	0.0925648
Carn.a.C12.1	-0.159489	0.60223	0.634207
Carn.a.C14.0	1.08477	0.00355629	0.0141066
Carn.a.C14.1	0.455796	0.145774	0.204083
Carn.a.C14.2	0.292079	0.251835	0.299684
Carn.a.C16.0	0.864214	0.0346014	0.0664123
Carn.a.C16.1	0.454889	0.148827	0.204196
Carn.a.C18.0	0.67517	0.0518238	0.0881005
Carn.a.C18.1	0.753332	0.0658865	0.101825
lyso.PC.a.C14.0	-0.279092	0.290374	0.335481
lyso.PC.a.C16.0	0.548018	0.106758	0.154929
lyso.PC.a.C16.1	0.144732	0.56561	0.600961
lyso.PC.a.C18.0	0.663733	0.0171645	0.0425536
lyso.PC.a.C18.1	0.556302	0.0881165	0.132732
lyso.PC.a.C18.2	0.44337	0.206852	0.253988
lyso.PC.a.C18.3	0.0293674	0.909327	0.924871
lyso.PC.a.C20.3	0.498183	0.123364	0.176872
lyso.PC.a.C20.4	0.607555	0.155299	0.204196
lyso.PC.a.C20.5	0.0335268	0.91903	0.926818
lyso.PC.a.C22.6	0.505939	0.207032	0.253988
lyso.PC.e.C16.0	0.257345	0.423289	0.47076
lyso.PC.e.C18.0	0.33216	0.203168	0.253988
lyso.PC.e.C18.1	0.436073	0.185036	0.236767
PC.aa.C30.0	0.795688	0.00272384	0.0118026
PC.aa.C32.0	0.683371	0.00554937	0.017848
PC.aa.C32.1	0.298195	0.153283	0.204196
PC.aa.C32.2	0.709495	0.0105007	0.0283997
PC.aa.C32.3	0.06585	0.78438	0.804665
PC.aa.C34.1	0.703974	0.0244025	0.0530252
PC.aa.C34.2	1.12508	0.000801098	0.00560768
PC.aa.C34.3	0.628474	0.0245074	0.0530252
PC.aa.C34.4	0.921109	0.00690157	0.0200314
PC.aa.C34.5	0.945662	0.0136641	0.0345963
PC.aa.C36.1	0.668644	0.0332325	0.065911
PC.aa.C36.2	1.09558	0.00142585	0.00706983
PC.aa.C36.3	1.14912	0.00069041	0.00560768
PC.aa.C36.4	1.30394	0.000280754	0.00560768
PC.aa.C36.5	1.05396	0.00118732	0.00706456
PC.aa.C36.6	0.54291	0.0948013	0.139276
PC.aa.C38.0	0.729429	0.0386795	0.0708133
PC.aa.C38.2	0.885728	0.00666145	0.0200314
PC.aa.C38.3	1.0814	0.000706067	0.00560768
PC.aa.C38.4	1.2604	0.000504205	0.00560768
PC.aa.C38.5	1.20942	0.000244174	0.00560768
PC.aa.C38.6	1.1913	0.000715462	0.00560768
PC.aa.C40.4	1.20521	0.000481458	0.00560768
PC.aa.C40.5	1.23943	0.000108808	0.00560768
PC.aa.C40.6	1.0887	0.00070038	0.00560768
PC.aa.C44.12	0.929761	0.00545208	0.017848
PC.ae.C30.0	0.55219	0.0355829	0.06689
PC.ae.C32.0	0.534637	0.0222242	0.0498995
PC.ae.C32.1	0.750474	0.00489026	0.0166568
PC.ae.C32.2	0.757331	0.0176167	0.0427834
PC.ae.C34.0	0.342605	0.150759	0.204196
PC.ae.C34.1	0.446357	0.0583237	0.0925648
PC.ae.C34.2	0.849544	0.00677537	0.0200314
PC.ae.C34.3	0.909881	0.00959556	0.0265552
PC.ae.C34.4	0.987461	7.58796e-05	0.00560768
PC.ae.C36.0	0.659887	0.0338999	0.0661326
PC.ae.C36.1	0.386184	0.0803621	0.122604
PC.ae.C36.2	0.660625	0.0208173	0.0494647
PC.ae.C36.3	0.826957	0.0132093	0.0341718
PC.ae.C36.4	1.07044	0.00283677	0.0118026
PC.ae.C36.5	1.10557	0.00250832	0.0114804
PC.ae.C36.6	1.16011	0.000241577	0.00560768
PC.ae.C38.0	1.01763	0.00406986	0.0151348
PC.ae.C38.3	1.00418	0.00129452	0.00706983
PC.ae.C38.4	1.08871	0.00287627	0.0118026
PC.ae.C38.5	1.15208	0.00140595	0.00706983
PC.ae.C38.6	1.19373	0.0011325	0.00706456
PC.ae.C40.0	1.16413	0.000344949	0.00560768
PC.ae.C40.1	0.640075	0.05019	0.0865595
PC.ae.C40.2	0.641345	0.0121905	0.0322372
PC.ae.C40.4	1.2853	0.00102411	0.00677051
PC.ae.C40.5	1.32804	0.000374101	0.00560768
PC.ae.C40.6	1.09559	0.00380396	0.0146023
PC.ae.C42.6	1.11498	0.0016969	0.00807726
SM.a.C30.1	0.532463	0.0533213	0.0893695
SM.a.C31.1	0.532195	0.0252227	0.0535982
SM.a.C32.1	0.933306	0.00887955	0.0251587
SM.a.C32.2	0.855309	0.00579556	0.0181493
SM.a.C33.1	0.419659	0.151653	0.204196
SM.a.C33.2	0.254315	0.27712	0.326507
SM.a.C33.3	0.618356	0.063619	0.0996139
SM.a.C34.1	0.700809	0.0359744	0.06689
SM.a.C34.2	0.676785	0.0414765	0.0747835
SM.a.C35.0	0.223853	0.53264	0.576219
SM.a.C35.1	0.439059	0.15615	0.204196
SM.a.C35.2	0.207744	0.41679	0.467906
SM.a.C36.1	0.713564	0.044598	0.0780465
SM.a.C36.2	0.686702	0.0434156	0.0771113
SM.a.C36.3	0.863541	0.0291404	0.0597881
SM.a.C38.1	0.996872	0.004772	0.0166568
SM.a.C38.2	0.994293	0.00489905	0.0166568
SM.a.C39.1	0.402777	0.204591	0.253988
SM.a.C40.2	0.828011	0.0216148	0.0494647
SM.a.C41.1	0.465034	0.169224	0.218888
SM.a.C41.2	0.536719	0.126294	0.178916
SM.a.C42.1	0.448954	0.279977	0.32664
SM.a.C42.2	0.760963	0.0329925	0.065911
SM.a.C42.3	0.770238	0.0216065	0.0494647
SM.a.C42.4	1.14317	0.0007625	0.00560768
SM.a.C42.6	0.573461	0.0938292	0.139276
ΣLyso.PC.a	0.599946	0.0565309	0.0925648
ΣLyso.PC.e	0.336414	0.227813	0.273835
ΣLyso.PC	0.594216	0.0583391	0.0925648
ΣPC.aa	1.108	0.000762421	0.00560768
ΣPC.ae	1.04358	0.00134354	0.00706983
ΣPC	1.10613	0.000747274	0.00560768
ΣSM	0.759352	0.0280389	0.0585374

## Sheet: Table S8
Table S8. Significant results from the linear models for the change in polar lipid species with child hemoglobin level at baseline in severe malnourished children treated with RUTF
Analytes	Regression coefficient (β)	p-Value	p-value ( FDR adjusted)
H1	-0.048648	0.505215	0.583695
Carn	-0.0962842	0.167451	0.218974
Carn.a.C2.0	-0.0363424	0.535019	0.612186
Carn.a.C3.0	-0.0541359	0.232803	0.294719
Carn.a.C8.0	-0.108072	0.156707	0.207201
Carn.a.C8.1	0.00183595	0.982642	0.982642
Carn.a.C9.0	-0.216226	0.00734223	0.0218336
Carn.a.C10.0	0.00969289	0.900914	0.916315
Carn.a.C10.1	0.0174386	0.830495	0.859382
Carn.a.C12.0	-0.0819956	0.298458	0.366149
Carn.a.C12.1	0.0817988	0.18116	0.234327
Carn.a.C14.0	-0.128592	0.0681093	0.0976507
Carn.a.C14.1	0.0208298	0.734199	0.780219
Carn.a.C14.2	0.00405489	0.934549	0.942469
Carn.a.C16.0	-0.155481	0.0506529	0.0825711
Carn.a.C16.1	-0.026738	0.660877	0.721508
Carn.a.C18.0	-0.100765	0.126508	0.175051
Carn.a.C18.1	-0.117652	0.132959	0.177777
lyso.PC.a.C14.0	-0.00727262	0.890941	0.913983
lyso.PC.a.C16.0	-0.0374916	0.598296	0.671672
lyso.PC.a.C16.1	-0.0379166	0.438734	0.522093
lyso.PC.a.C18.0	-0.0178774	0.754095	0.78717
lyso.PC.a.C18.1	-0.0560068	0.387995	0.466378
lyso.PC.a.C18.2	-0.0525341	0.463368	0.540596
lyso.PC.a.C18.3	0.0844396	0.118189	0.165464
lyso.PC.a.C20.3	-0.0209651	0.734323	0.780219
lyso.PC.a.C20.4	-0.0615821	0.456738	0.538136
lyso.PC.a.C20.5	0.0202588	0.74814	0.78717
lyso.PC.a.C22.6	-0.0368826	0.630918	0.701675
lyso.PC.e.C16.0	-0.0731249	0.244413	0.30616
lyso.PC.e.C18.0	-0.085519	0.103271	0.146301
lyso.PC.e.C18.1	-0.0712014	0.27499	0.340874
PC.aa.C30.0	-0.183173	0.000671187	0.0102634
PC.aa.C32.0	-0.117475	0.0171694	0.0343945
PC.aa.C32.1	-0.116003	0.0070469	0.0218336
PC.aa.C32.2	-0.214233	0.000258832	0.0102634
PC.aa.C32.3	-0.179022	0.0012937	0.0102634
PC.aa.C34.1	-0.132304	0.029936	0.05317
PC.aa.C34.2	-0.149478	0.0284877	0.0516614
PC.aa.C34.3	-0.153564	0.00533286	0.0218336
PC.aa.C34.4	-0.222742	0.00123871	0.0102634
PC.aa.C34.5	-0.127987	0.0528588	0.0850027
PC.aa.C36.1	-0.1538	0.0117555	0.0265389
PC.aa.C36.2	-0.156243	0.0272805	0.0507247
PC.aa.C36.3	-0.182784	0.00605888	0.0218336
PC.aa.C36.4	-0.21303	0.00233445	0.0132286
PC.aa.C36.5	-0.210166	0.00116287	0.0102634
PC.aa.C36.6	-0.141211	0.0319374	0.0558905
PC.aa.C38.0	-0.0409782	0.566127	0.641611
PC.aa.C38.2	-0.11819	0.0647595	0.0944729
PC.aa.C38.3	-0.20071	0.00123076	0.0102634
PC.aa.C38.4	-0.218843	0.00172079	0.0107776
PC.aa.C38.5	-0.219819	0.000662989	0.0102634
PC.aa.C38.6	-0.197984	0.00372268	0.0170384
PC.aa.C40.4	-0.218328	0.00127956	0.0102634
PC.aa.C40.5	-0.266109	3.50461e-05	0.00417048
PC.aa.C40.6	-0.201536	0.00128082	0.0102634
PC.aa.C44.12	-0.17602	0.00729595	0.0218336
PC.ae.C30.0	-0.159354	0.00309069	0.0167178
PC.ae.C32.0	-0.124735	0.00752251	0.0218336
PC.ae.C32.1	-0.138944	0.0092581	0.0242105
PC.ae.C32.2	-0.115564	0.0616983	0.0929379
PC.ae.C34.0	-0.137184	0.00468119	0.019895
PC.ae.C34.1	-0.127364	0.00665973	0.0218336
PC.ae.C34.2	-0.130114	0.0367449	0.0624663
PC.ae.C34.3	-0.0981524	0.18785	0.240367
PC.ae.C34.4	-0.0702526	0.131758	0.177777
PC.ae.C36.0	-0.109958	0.0555826	0.088191
PC.ae.C36.1	-0.138472	0.00156315	0.0103341
PC.ae.C36.2	-0.137542	0.0140902	0.0294164
PC.ae.C36.3	-0.167792	0.0102366	0.0252267
PC.ae.C36.4	-0.181816	0.0114041	0.0265389
PC.ae.C36.5	-0.179145	0.0121694	0.0265389
PC.ae.C36.6	-0.0583978	0.33485	0.406604
PC.ae.C38.0	-0.142862	0.0463723	0.076643
PC.ae.C38.3	-0.184628	0.00198488	0.01181
PC.ae.C38.4	-0.213474	0.00337961	0.0167572
PC.ae.C38.5	-0.205631	0.0040069	0.01766
PC.ae.C38.6	-0.201135	0.00608082	0.0218336
PC.ae.C40.0	-0.266963	8.67528e-05	0.00516179
PC.ae.C40.1	-0.154773	0.0173418	0.0343945
PC.ae.C40.2	-0.130763	0.00935866	0.0242105
PC.ae.C40.4	-0.198363	0.0103875	0.0252267
PC.ae.C40.5	-0.212631	0.00324554	0.0167572
PC.ae.C40.6	-0.189211	0.0110793	0.0263688
PC.ae.C42.6	-0.241194	0.000859486	0.0102634
SM.a.C30.1	-0.134915	0.0065739	0.0218336
SM.a.C31.1	-0.15458	0.00128463	0.0102634
SM.a.C32.1	-0.172926	0.00692554	0.0218336
SM.a.C32.2	-0.182754	0.00110054	0.0102634
SM.a.C33.1	-0.132326	0.0236444	0.045382
SM.a.C33.2	-0.12083	0.00846497	0.0234263
SM.a.C33.3	-0.126703	0.0585346	0.0908236
SM.a.C34.1	-0.127862	0.065099	0.0944729
SM.a.C34.2	-0.140039	0.0595315	0.0908236
SM.a.C35.0	-0.135438	0.0592845	0.0908236
SM.a.C35.1	-0.172724	0.00605075	0.0218336
SM.a.C35.2	-0.172829	0.00138752	0.0103197
SM.a.C36.1	-0.179149	0.0122659	0.0265389
SM.a.C36.2	-0.203792	0.0064411	0.0218336
SM.a.C36.3	-0.172897	0.0286526	0.0516614
SM.a.C38.1	-0.189318	0.00867183	0.0234533
SM.a.C38.2	-0.184281	0.0190189	0.0371024
SM.a.C39.1	-0.153474	0.0166917	0.0342468
SM.a.C40.2	-0.156698	0.0330161	0.0569408
SM.a.C41.1	-0.136536	0.0419542	0.0703177
SM.a.C41.2	-0.181146	0.0121308	0.0265389
SM.a.C42.1	-0.149485	0.0641641	0.0944729
SM.a.C42.2	-0.179658	0.0138524	0.0294164
SM.a.C42.3	-0.224848	0.00152731	0.0103341
SM.a.C42.4	-0.241644	0.000421622	0.0102634
SM.a.C42.6	-0.181739	0.0102872	0.0252267
ΣLyso.PC.a	-0.0283246	0.669546	0.724327
ΣLyso.PC.e	-0.084135	0.131201	0.177777
ΣLyso.PC	-0.0295444	0.655355	0.721508
ΣPC.aa	-0.174381	0.00799951	0.0226653
ΣPC.ae	-0.189281	0.00362363	0.0170384
ΣPC	-0.176547	0.00708657	0.0218336
ΣSM	-0.159621	0.026765	0.0505561
